# Supplementary material for: Sesquiterpenoids and Their Anti-Inflammatory Activity: Evaluation of Ainsliaea yunnanensis
Source: MDPI journal article supplement (doi:10.3390/molecules24091701), 2019-05-01

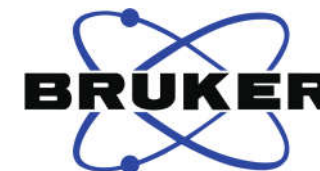

Current Data Parameters  
NAME 20190128-TRF-26  
EXPNO 2  
PROCNO 1

0.5 F2 - Acquisition Parameters  
Date\_ 20190130  
Time\_ 6.02  
INSTRUM spect  
1.0 PROBHD 5 mm CPPTCI 1H  
PULPROG roesyphpp.2  
TD 2048  
SOLVENT DMSO  
NS 32  
DS 32  
1.5 SWH 3501.401 Hz  
FIDRES 1.709668 Hz  
AQ 0.2924544 sec  
2.0 RG 64  
DW 142.800 usec  
DE 10.00 usec  
TE 298.2 K  
2.5 D0 0.00013371 sec  
D1 1.00000000 sec  
D11 0.03000000 sec  
D12 0.00002000 sec  
3.0 IN0 0.00028560 sec  
L4 1000  
P15 200000.00 usec

===== CHANNEL f1 =====  
3.5 SFO1 500.0616502 MHz  
NUC1 1H  
P1 8.00 usec  
P17 2500.00 usec  
4.0 P25 100.00 usec  
PLW1 8.69999981 W  
PLW10 0.61866999 W  
PLW27 0.22272000 W

4.5 F1 - Acquisition parameters  
TD 256  
SFO1 500.0617 MHz  
5.0 FIDRES 13.677346 Hz  
SW 7.002 ppm  
FnMODE States-TPPI

5.5 F2 - Processing parameters  
SI 1024  
SF 500.0600091 MHz  
WDW QSINE  
SSB 2  
6.0 LB 0 Hz  
GB 0  
PC 1.00

6.5 F1 - Processing parameters  
SI 1024  
MC2 States-TPPI  
SF 500.0600091 MHz  
WDW QSINE  
7.0 SSB 2  
LB 0 Hz  
GB 0

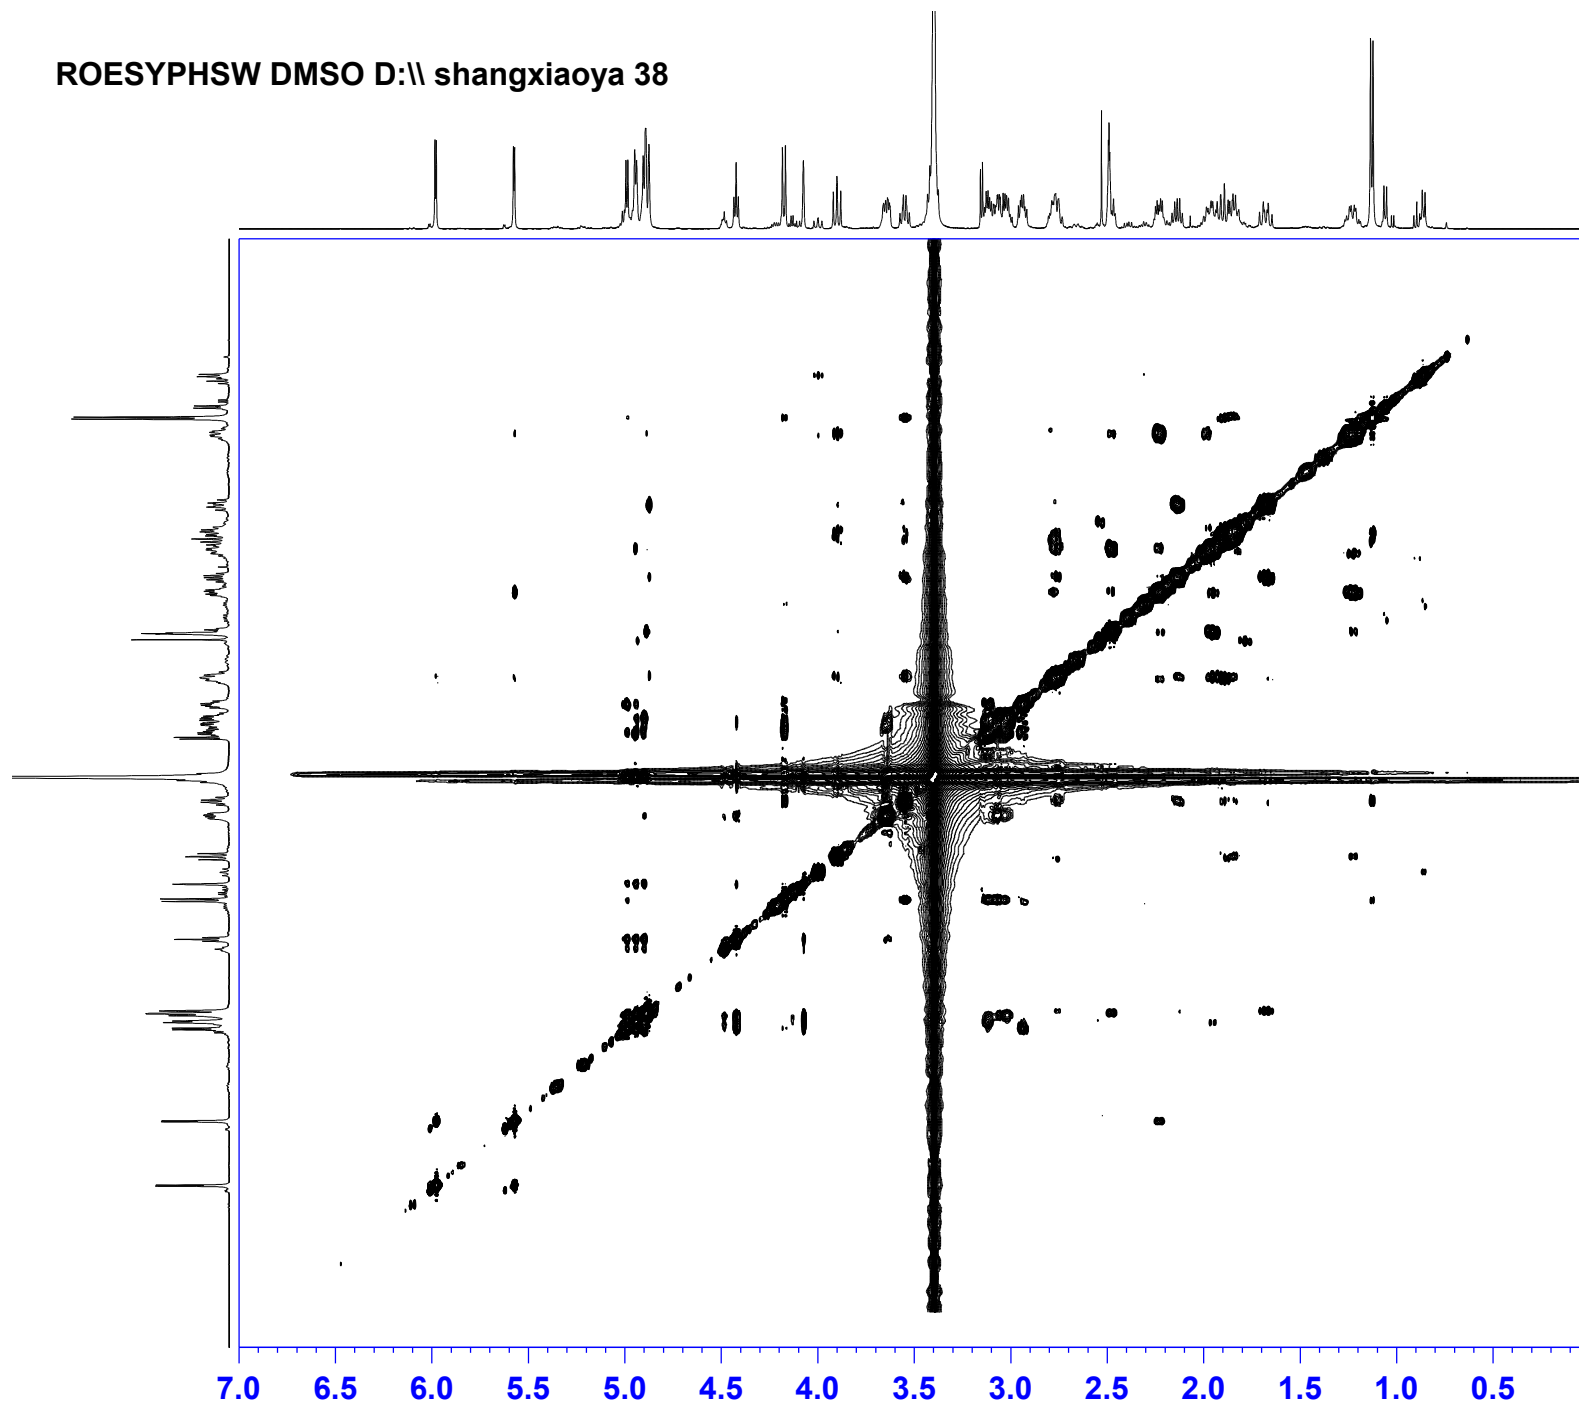

Supplement: s1 [file s1]
