# Supplementary material for: Sesquiterpenoids and Their Anti-Inflammatory Activity: Evaluation of Ainsliaea yunnanensis
Source: MDPI journal article supplement (doi:10.3390/molecules24091701), 2019-05-01
Supplement: s1 [file s1]

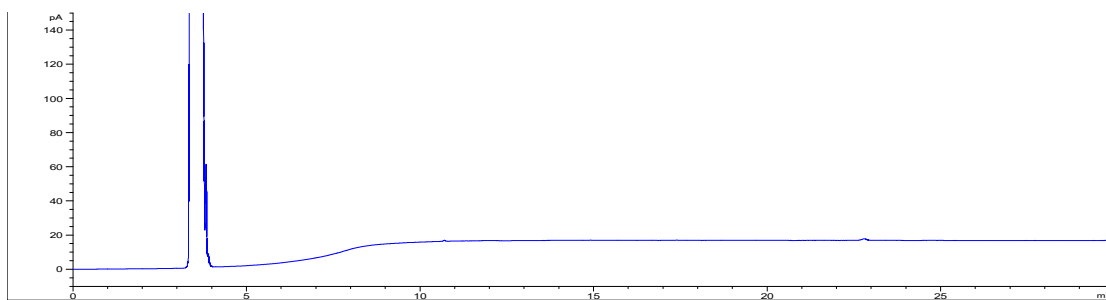

**Figure 1: Chromatogram of blank solvent**

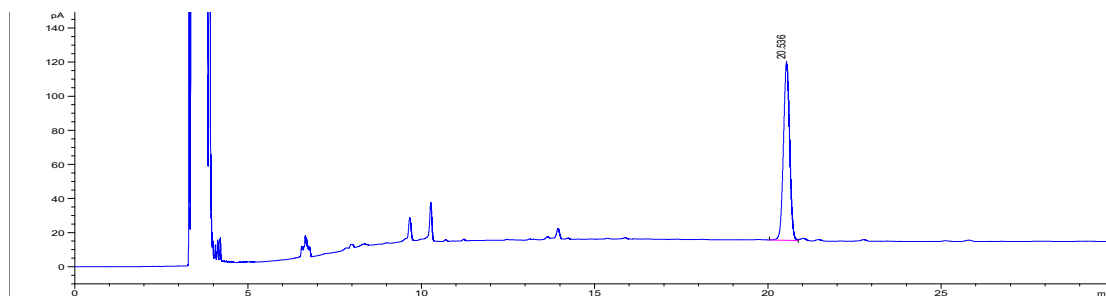

**Figure 2: Chromatogram of D-glucose**

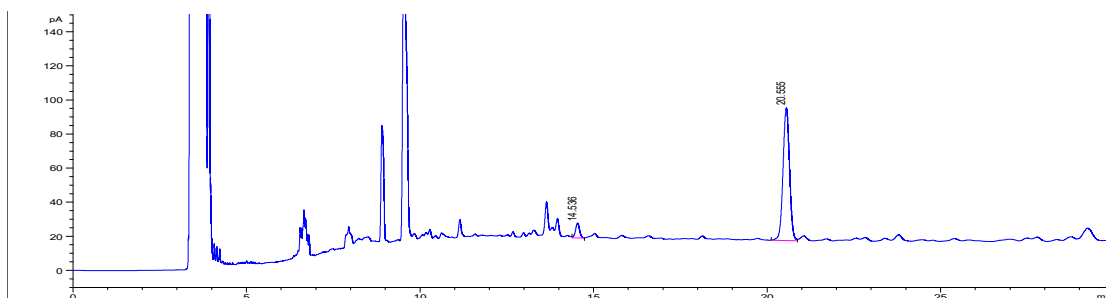

**Figure 3: Chromatogram of Compound 1**

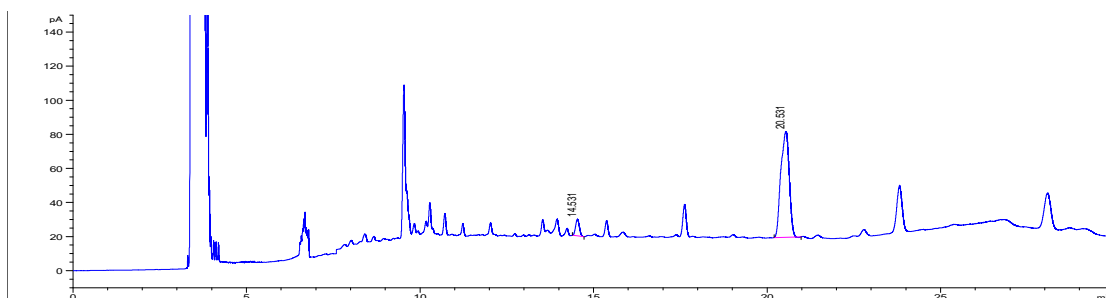

**Figure 4: Chromatogram of Compound 2**

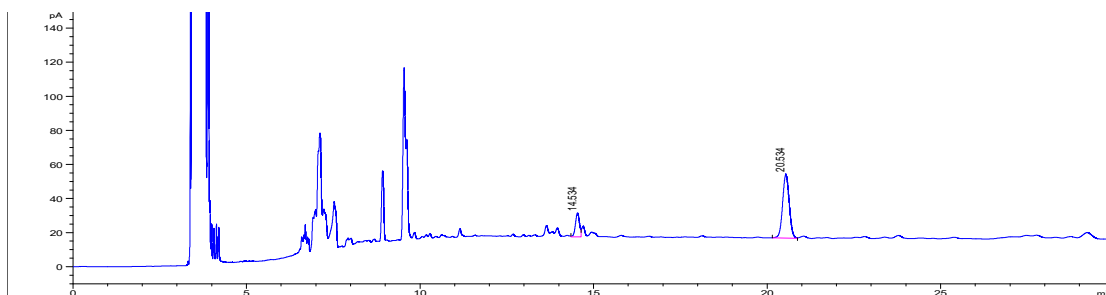

**Figure 5: Chromatogram of Compound 3**
