# Supplementary figures and images for: Sesquiterpenoids and Their Anti-Inflammatory Activity: Evaluation of Ainsliaea yunnanensis
Source: MDPI journal article supplement (doi:10.3390/molecules24091701), 2019-05-01

20171218-TRF-40  
1H-NMR DMSO D:  
\\ spangxiaoya 9

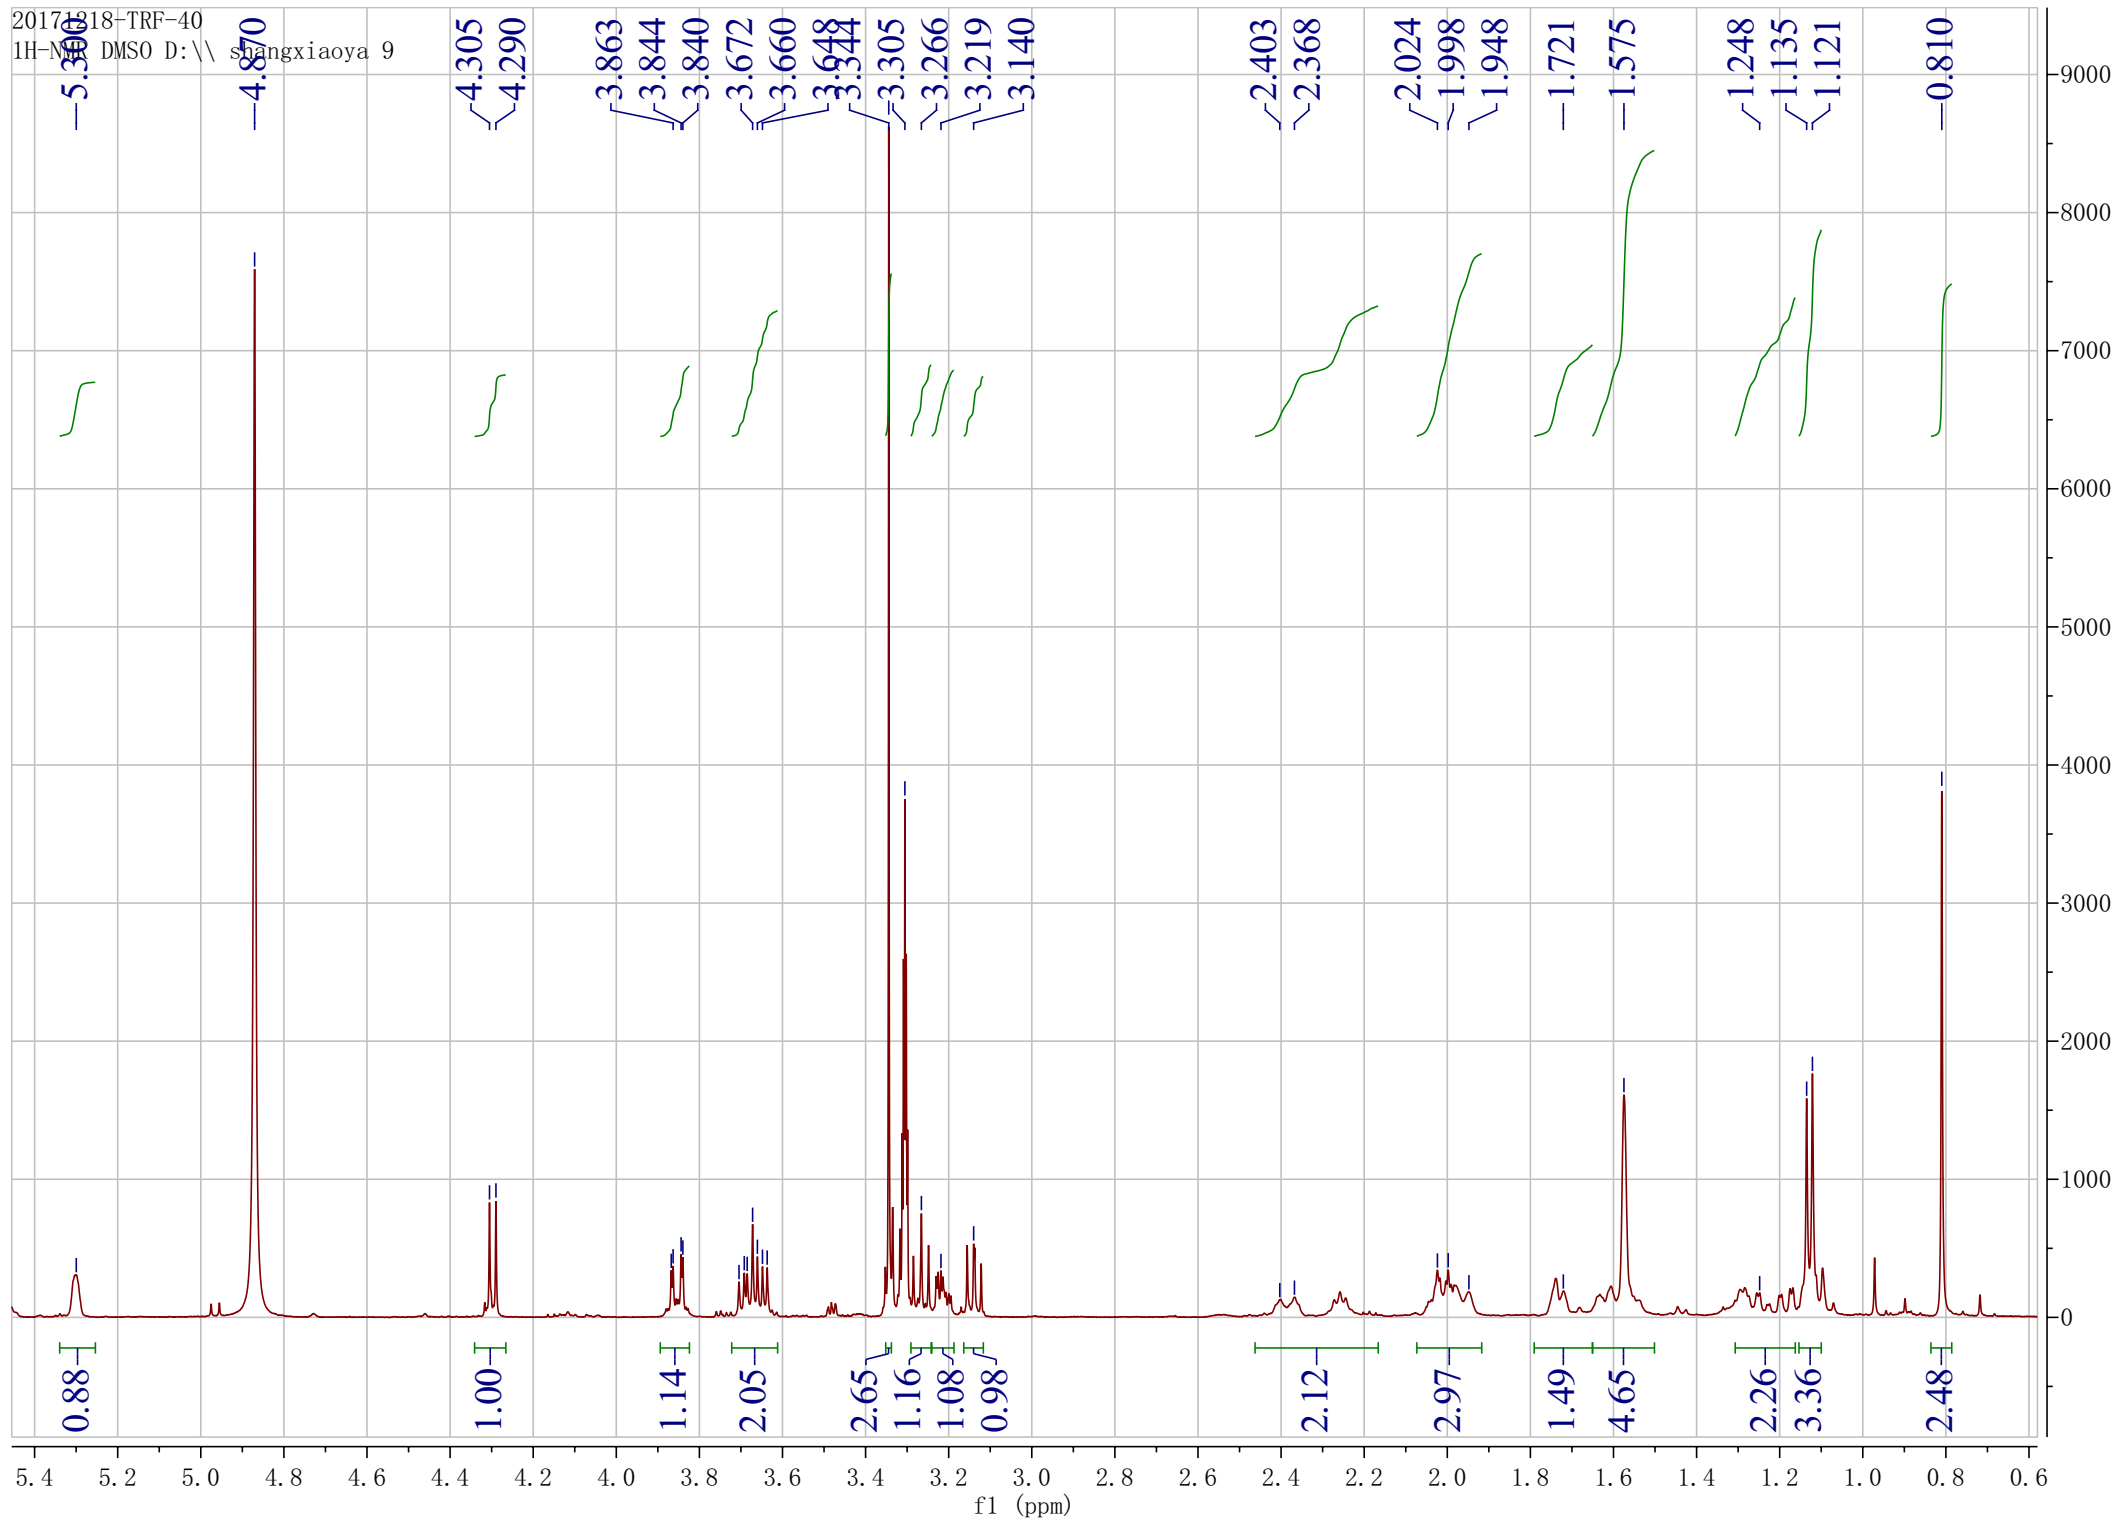

Supplement: s1 [file s1]

20170908-TRF-25  
BRUKER AVIII-500 1H-NMR TRF-25 IN DMSO 2017.09.08  
1H-NMR DMSO D:\shangxiaoya 17

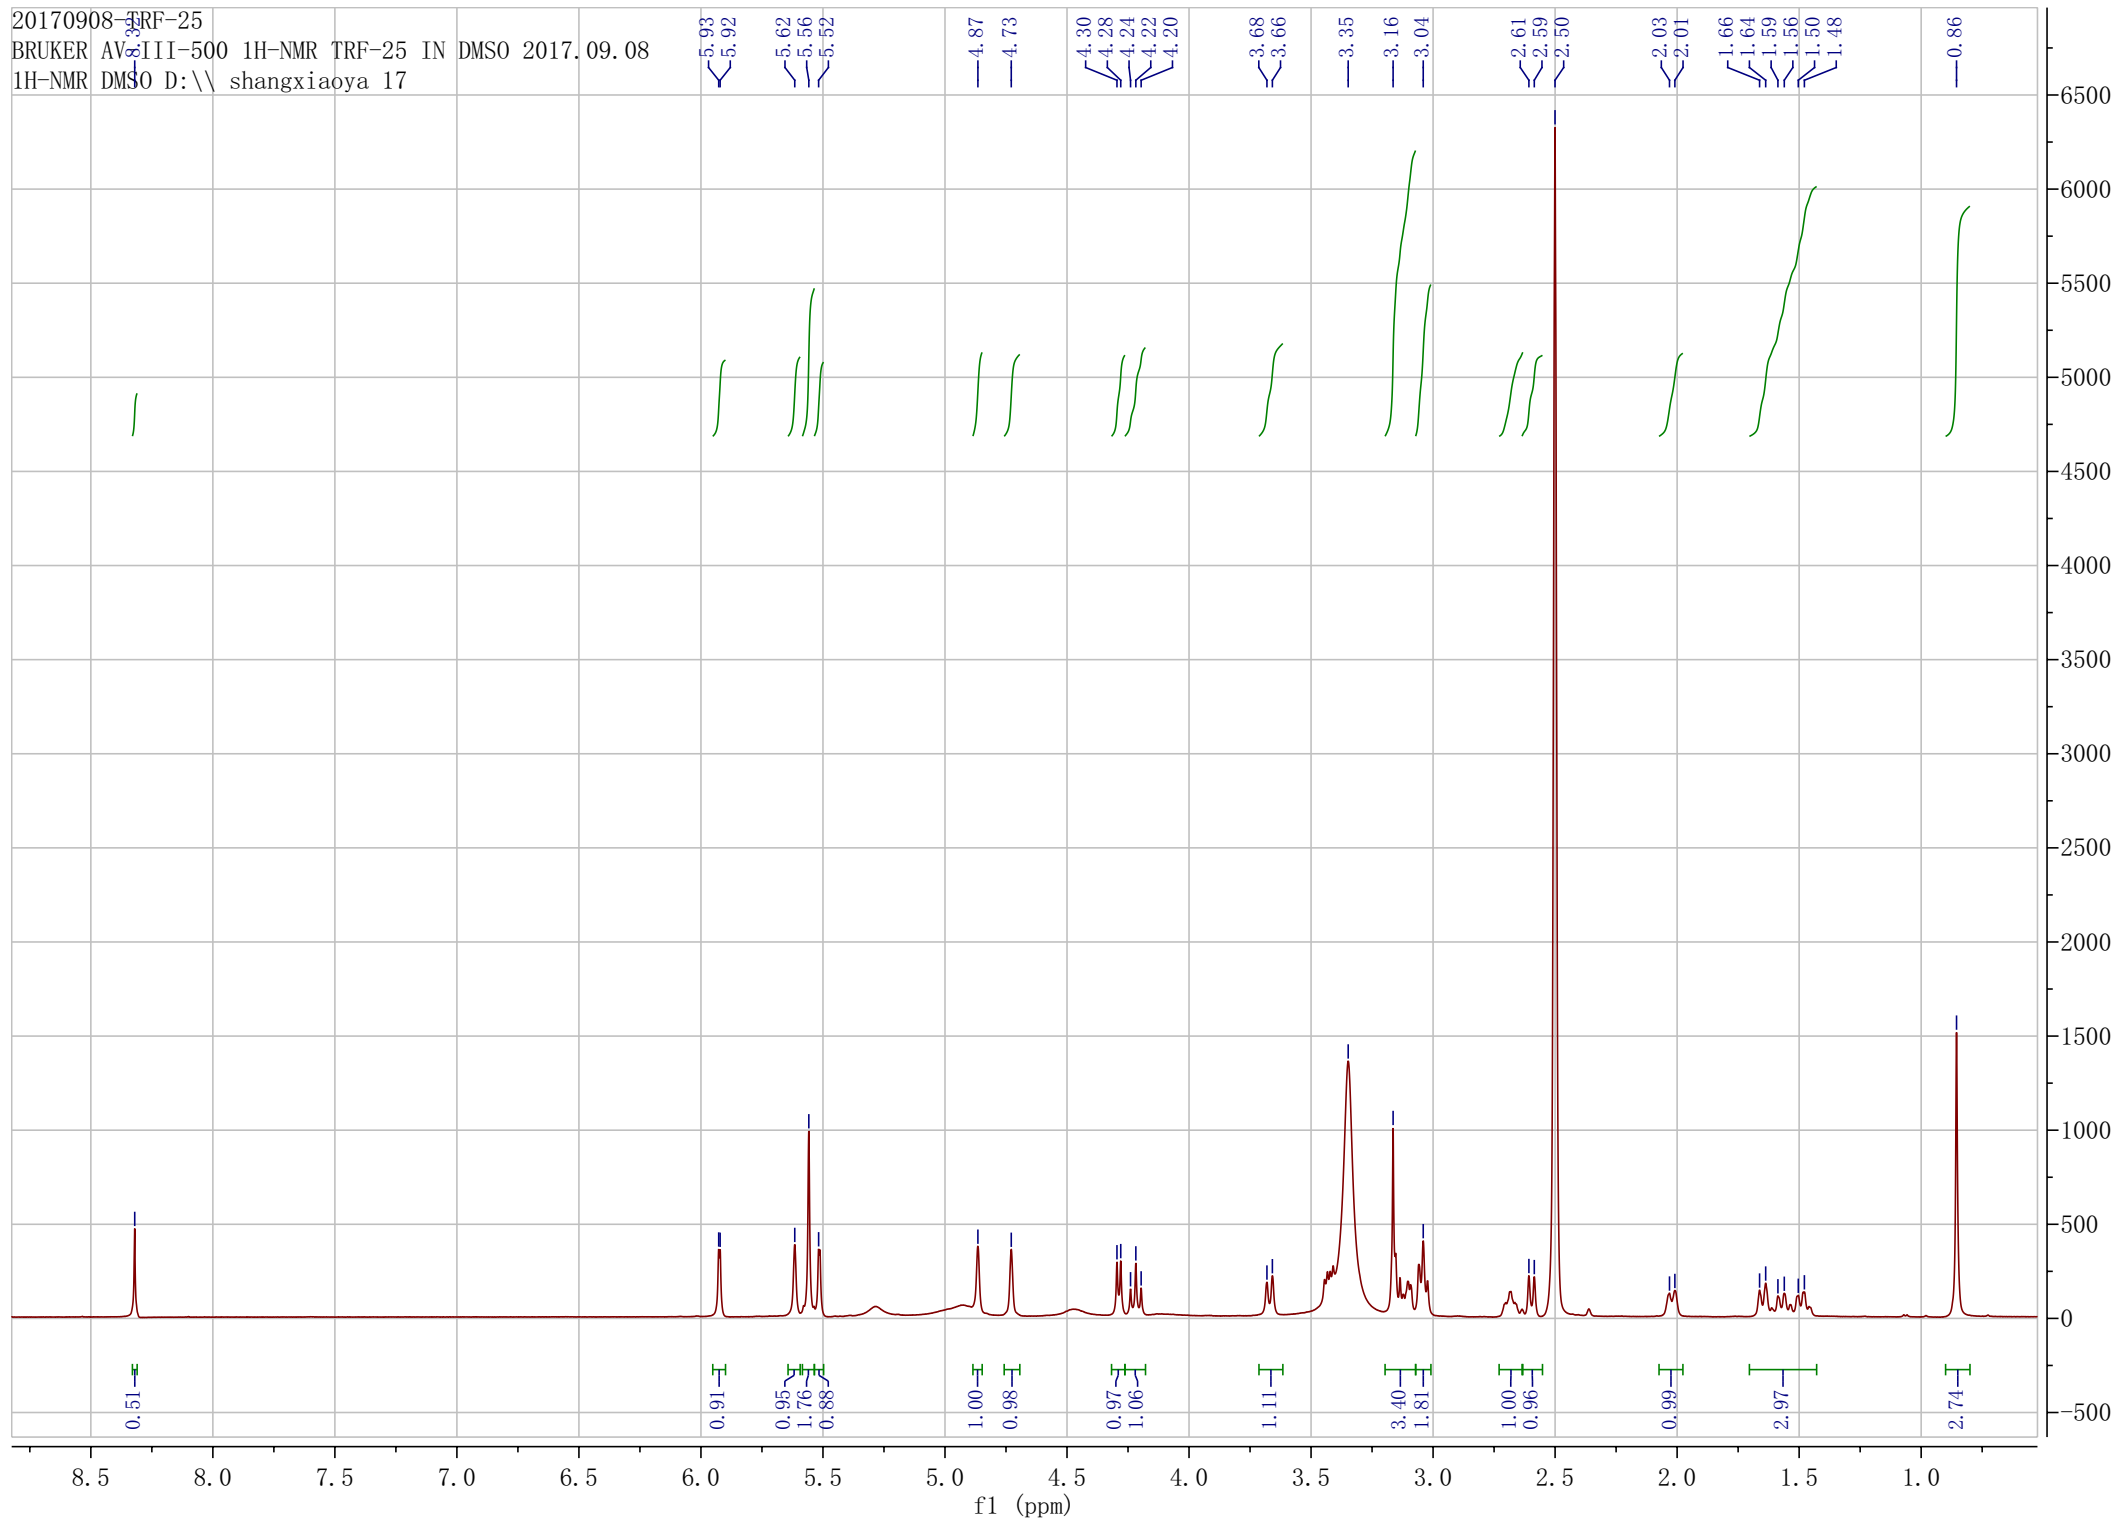

Supplement: s1 [file s1]

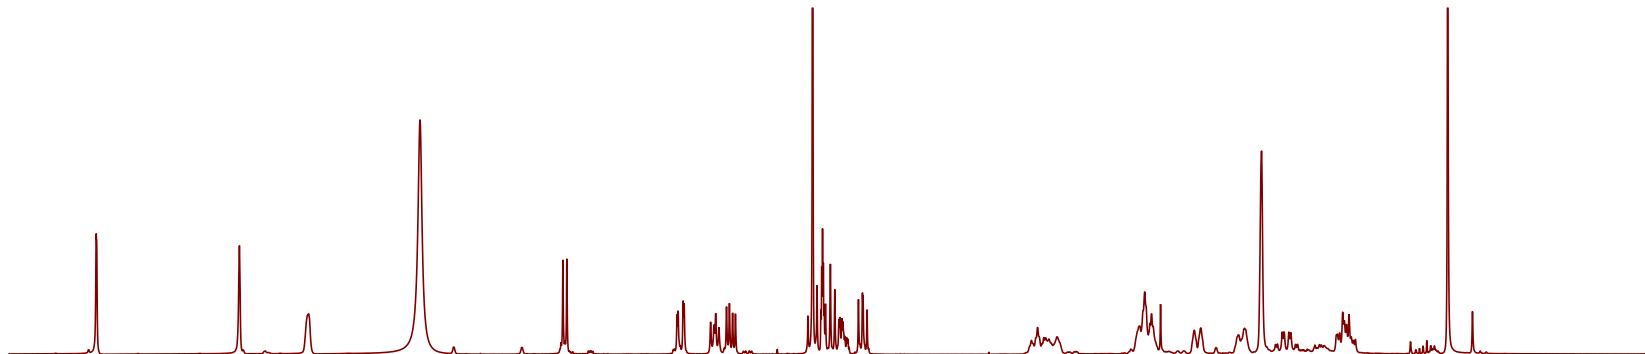

20180601-TRF-38

HMBCGPND MeOD D:\\ shanxiaoya 37

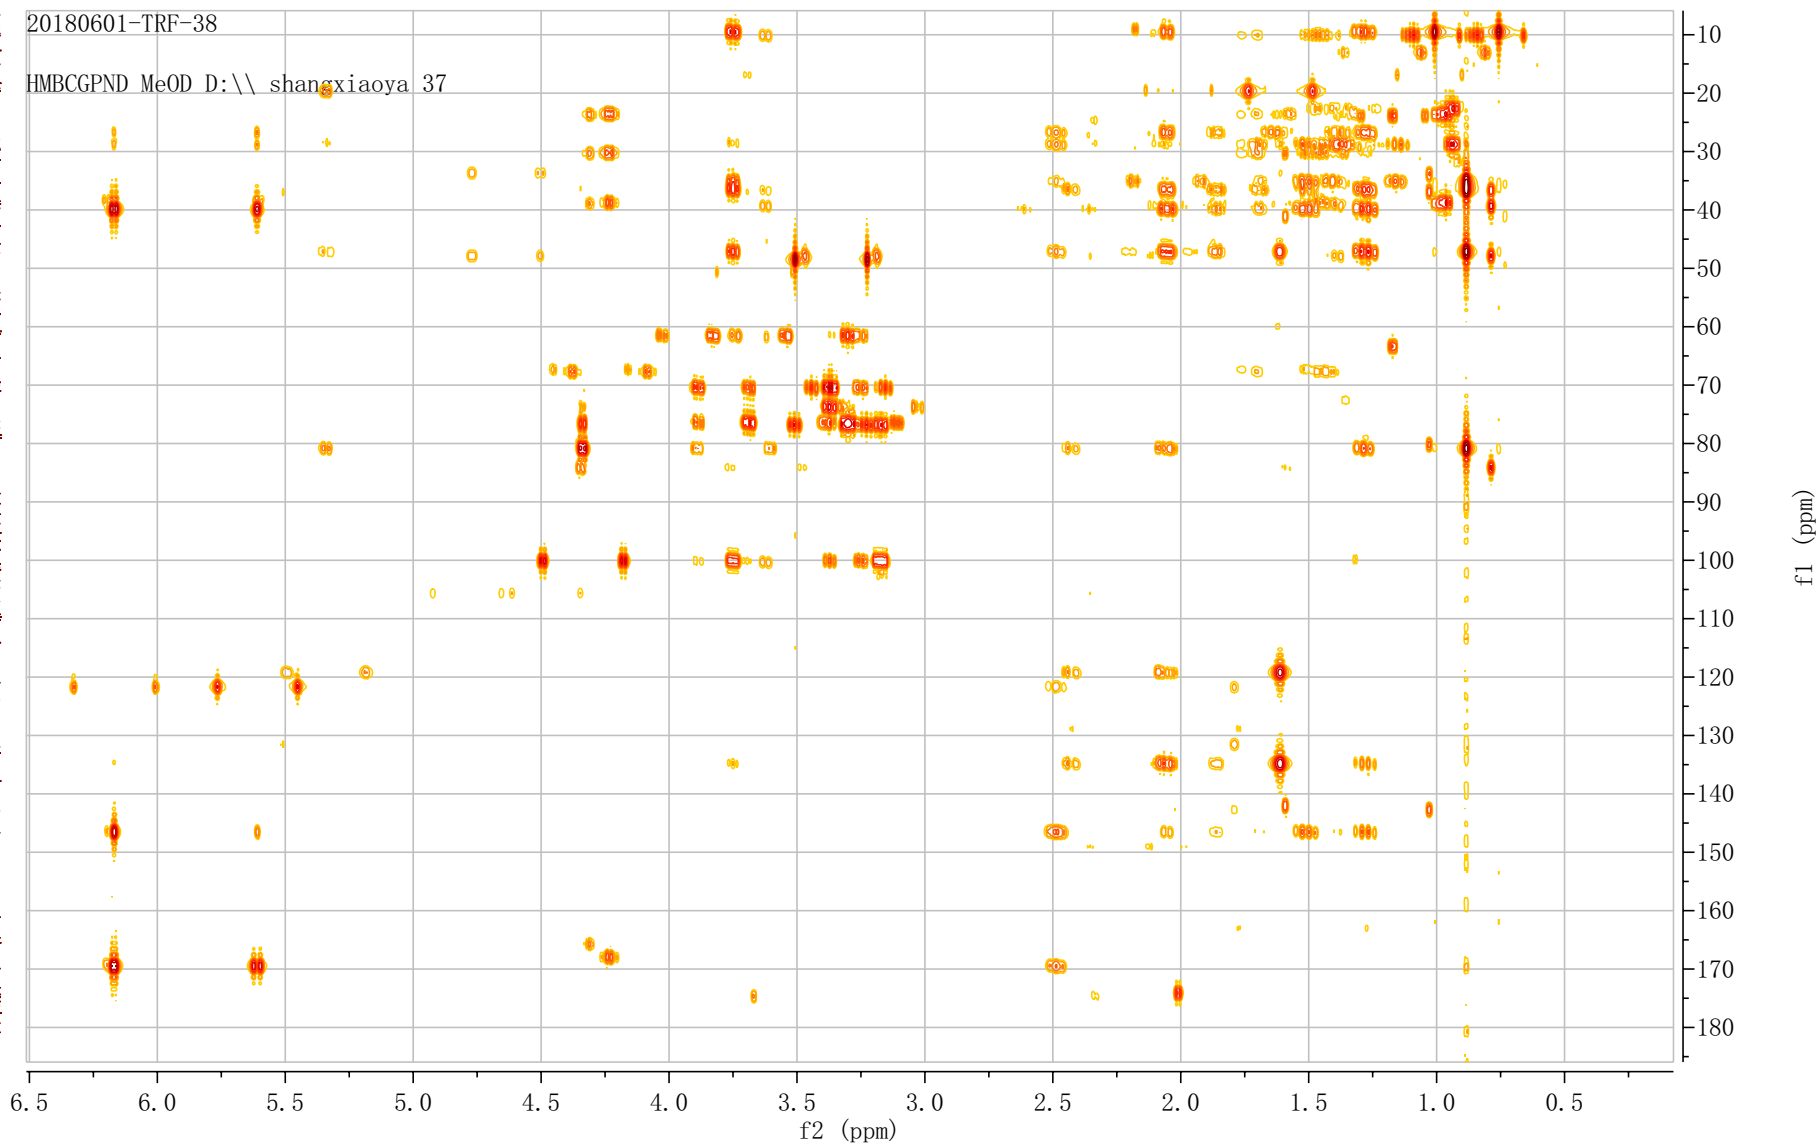

Supplement: s1 [file s1]

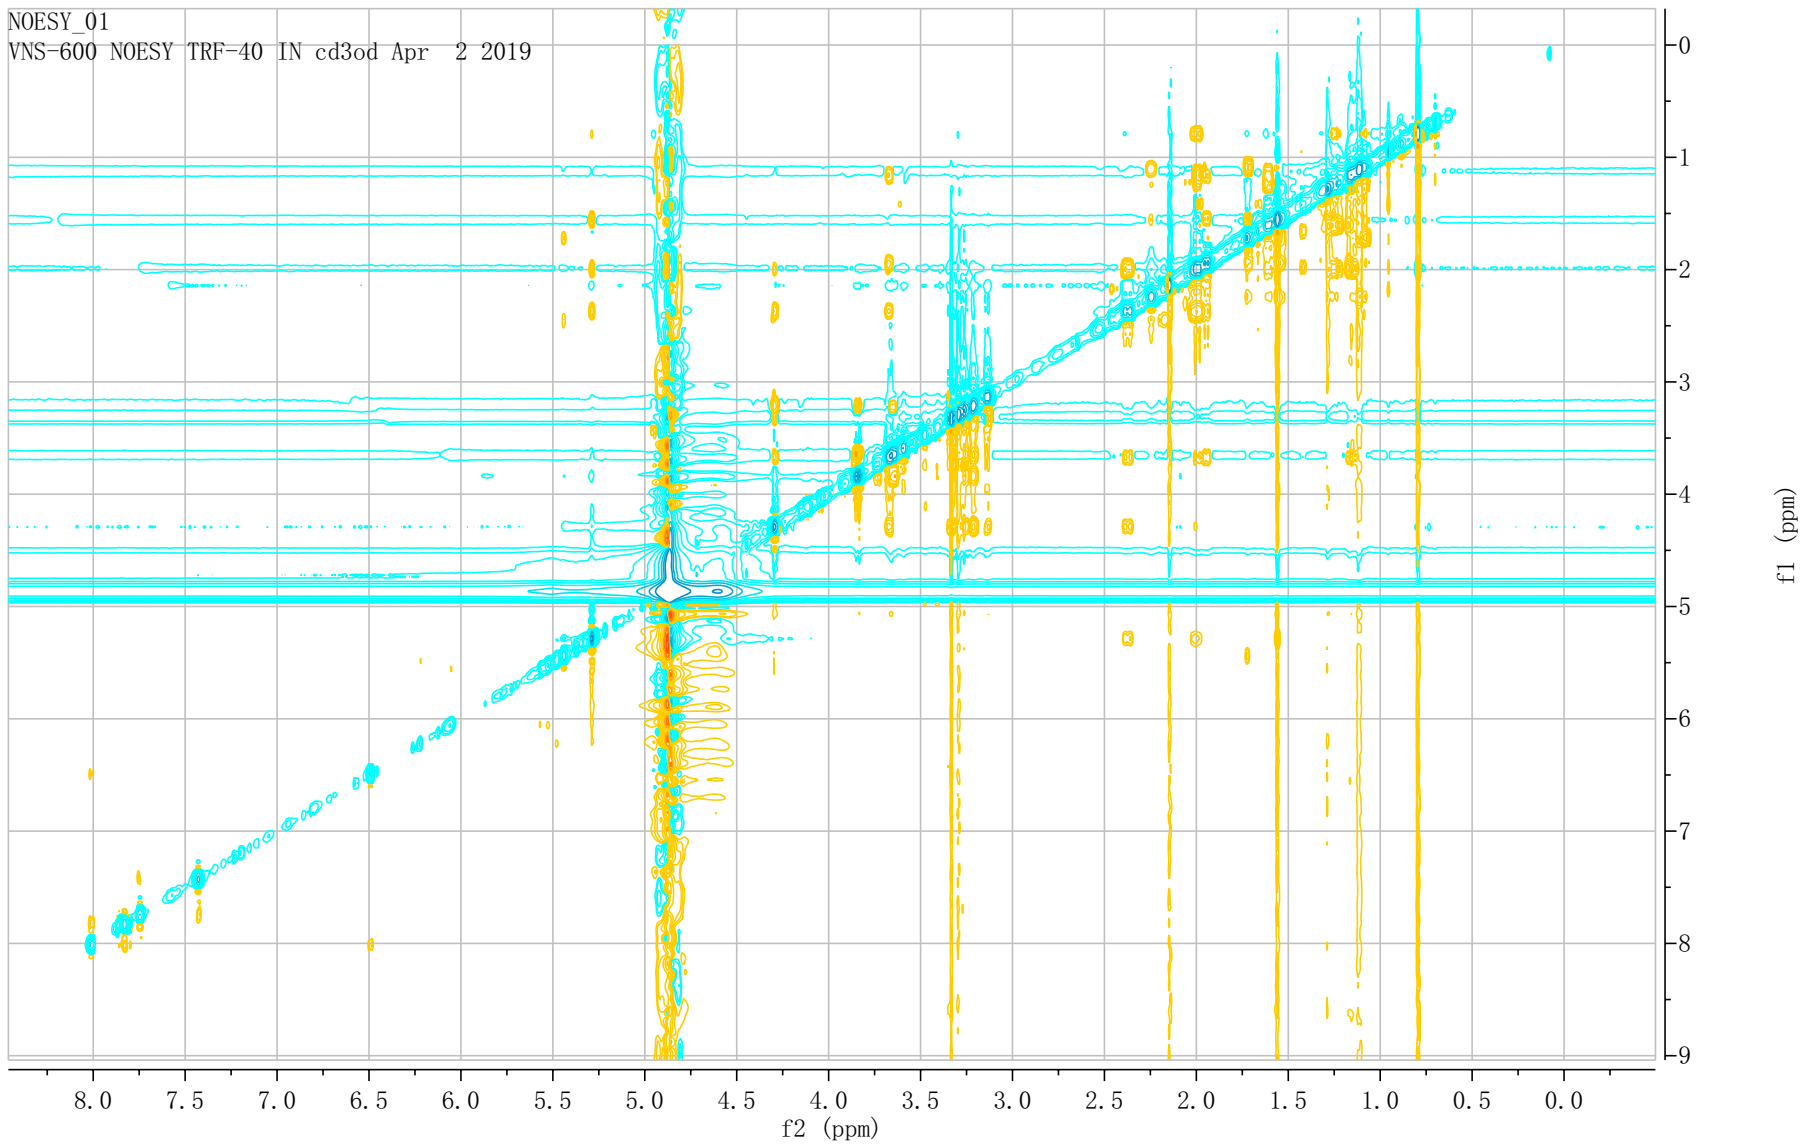

Supplement: s1 [file s1]

20171218-TRF-38

<sup>13</sup>C-NMR MeOD D:\shangxiagya 7

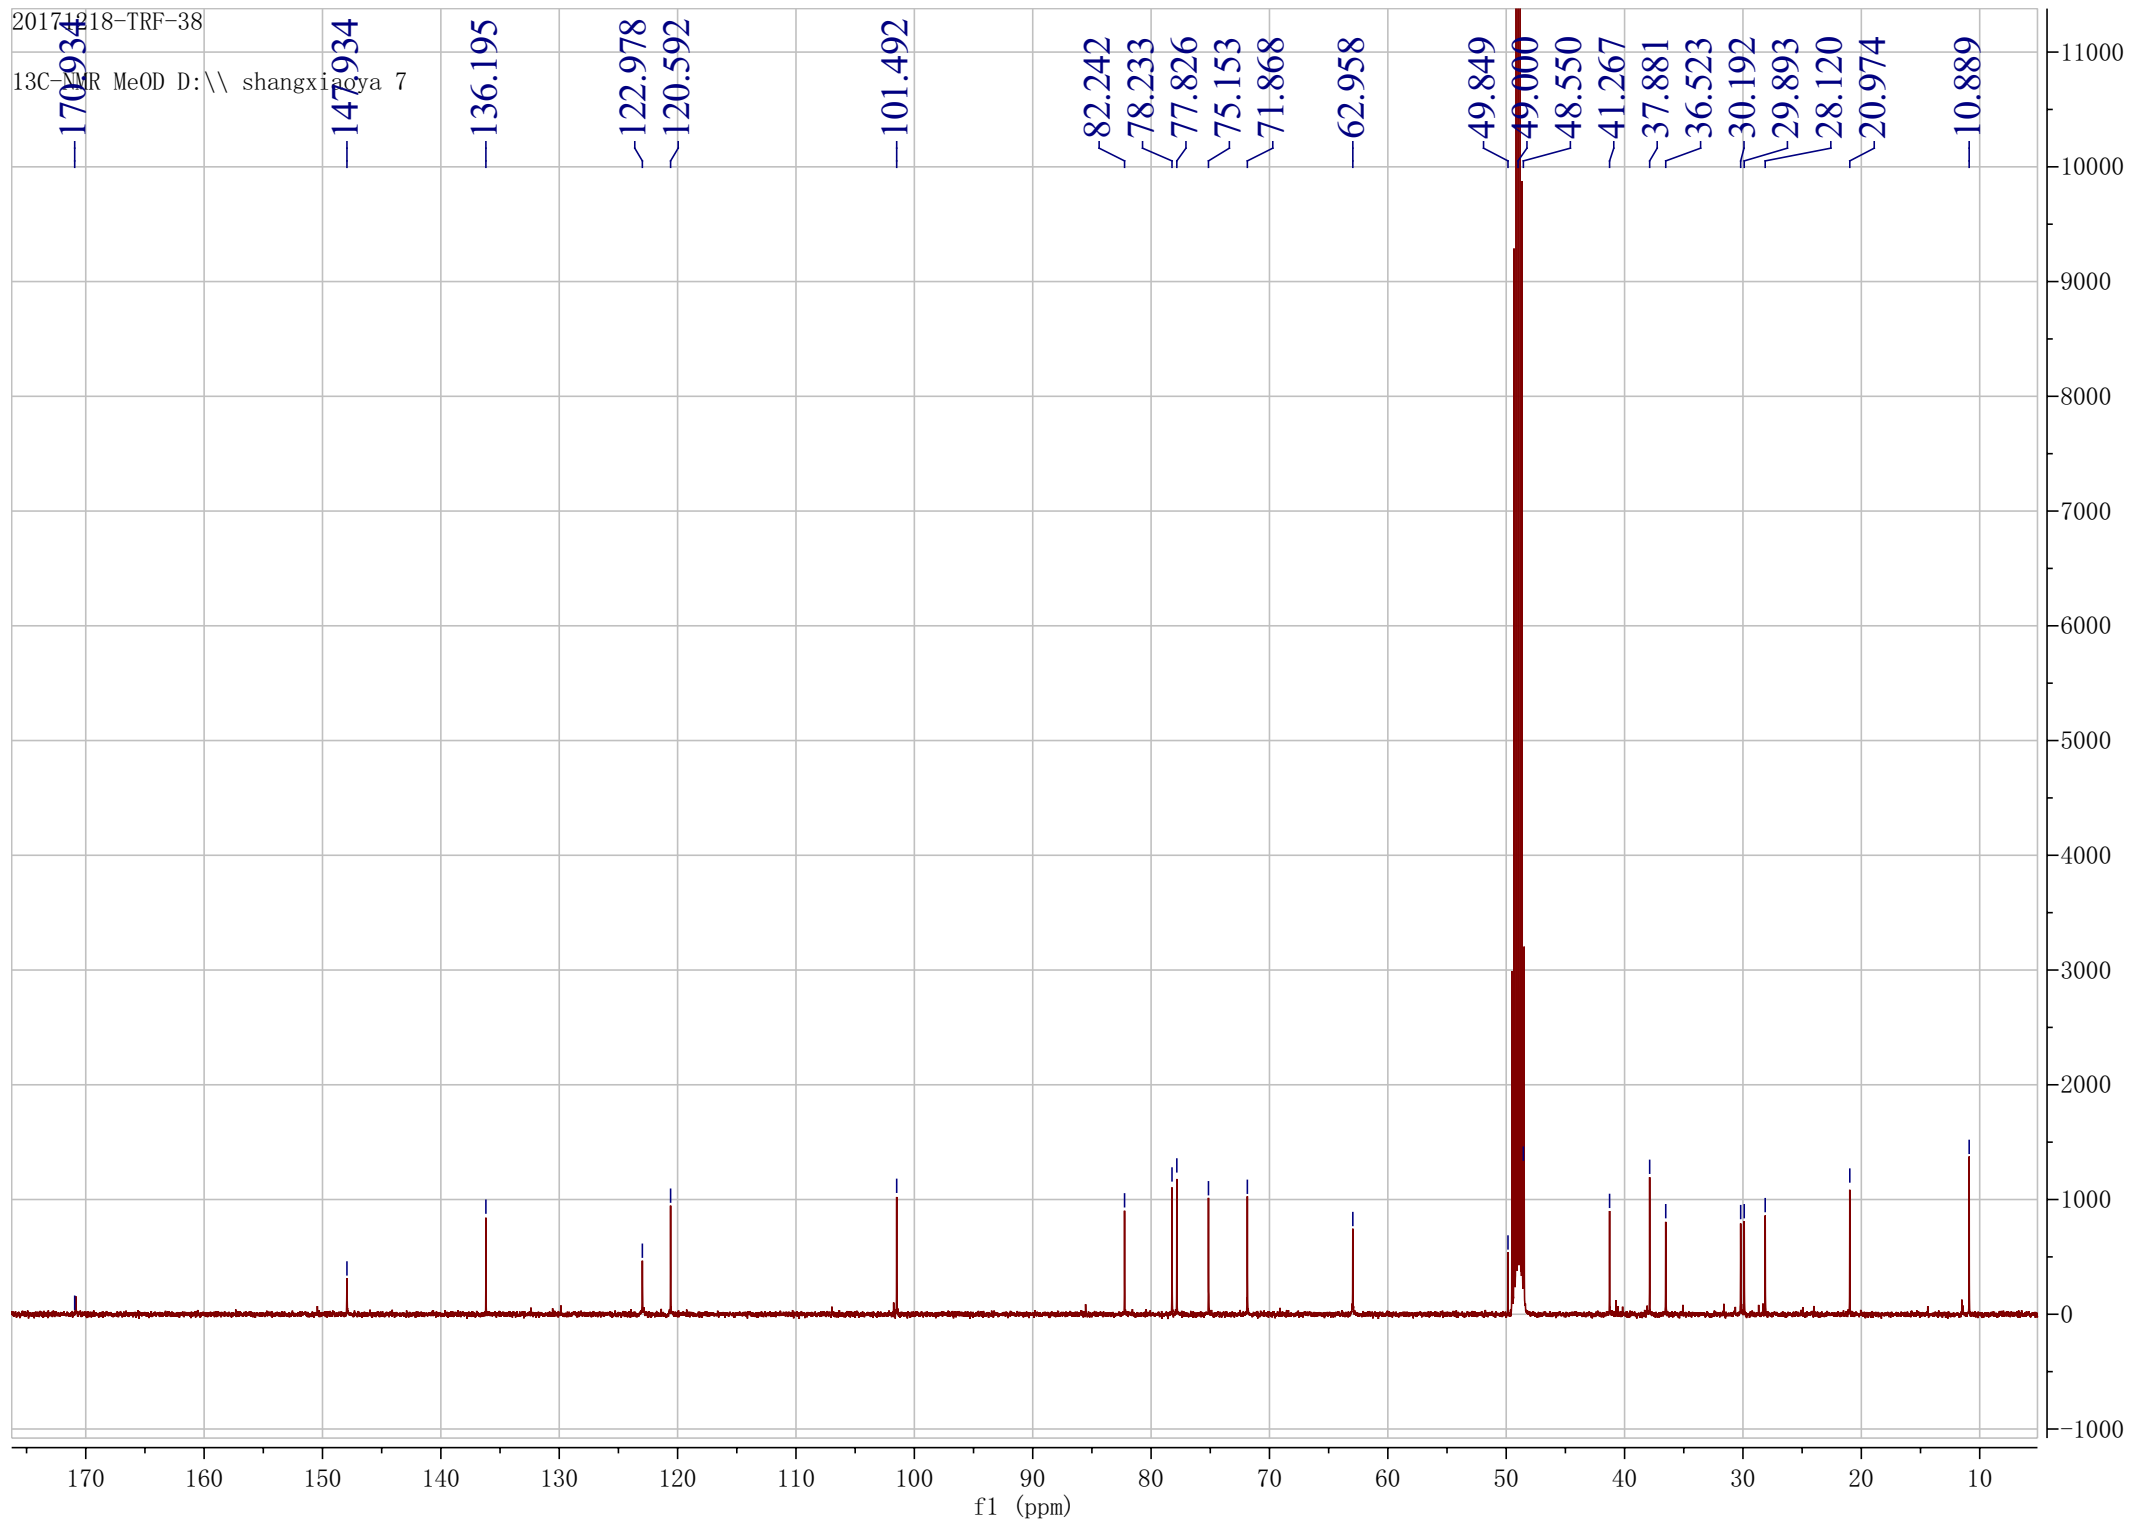

Supplement: s1 [file s1]

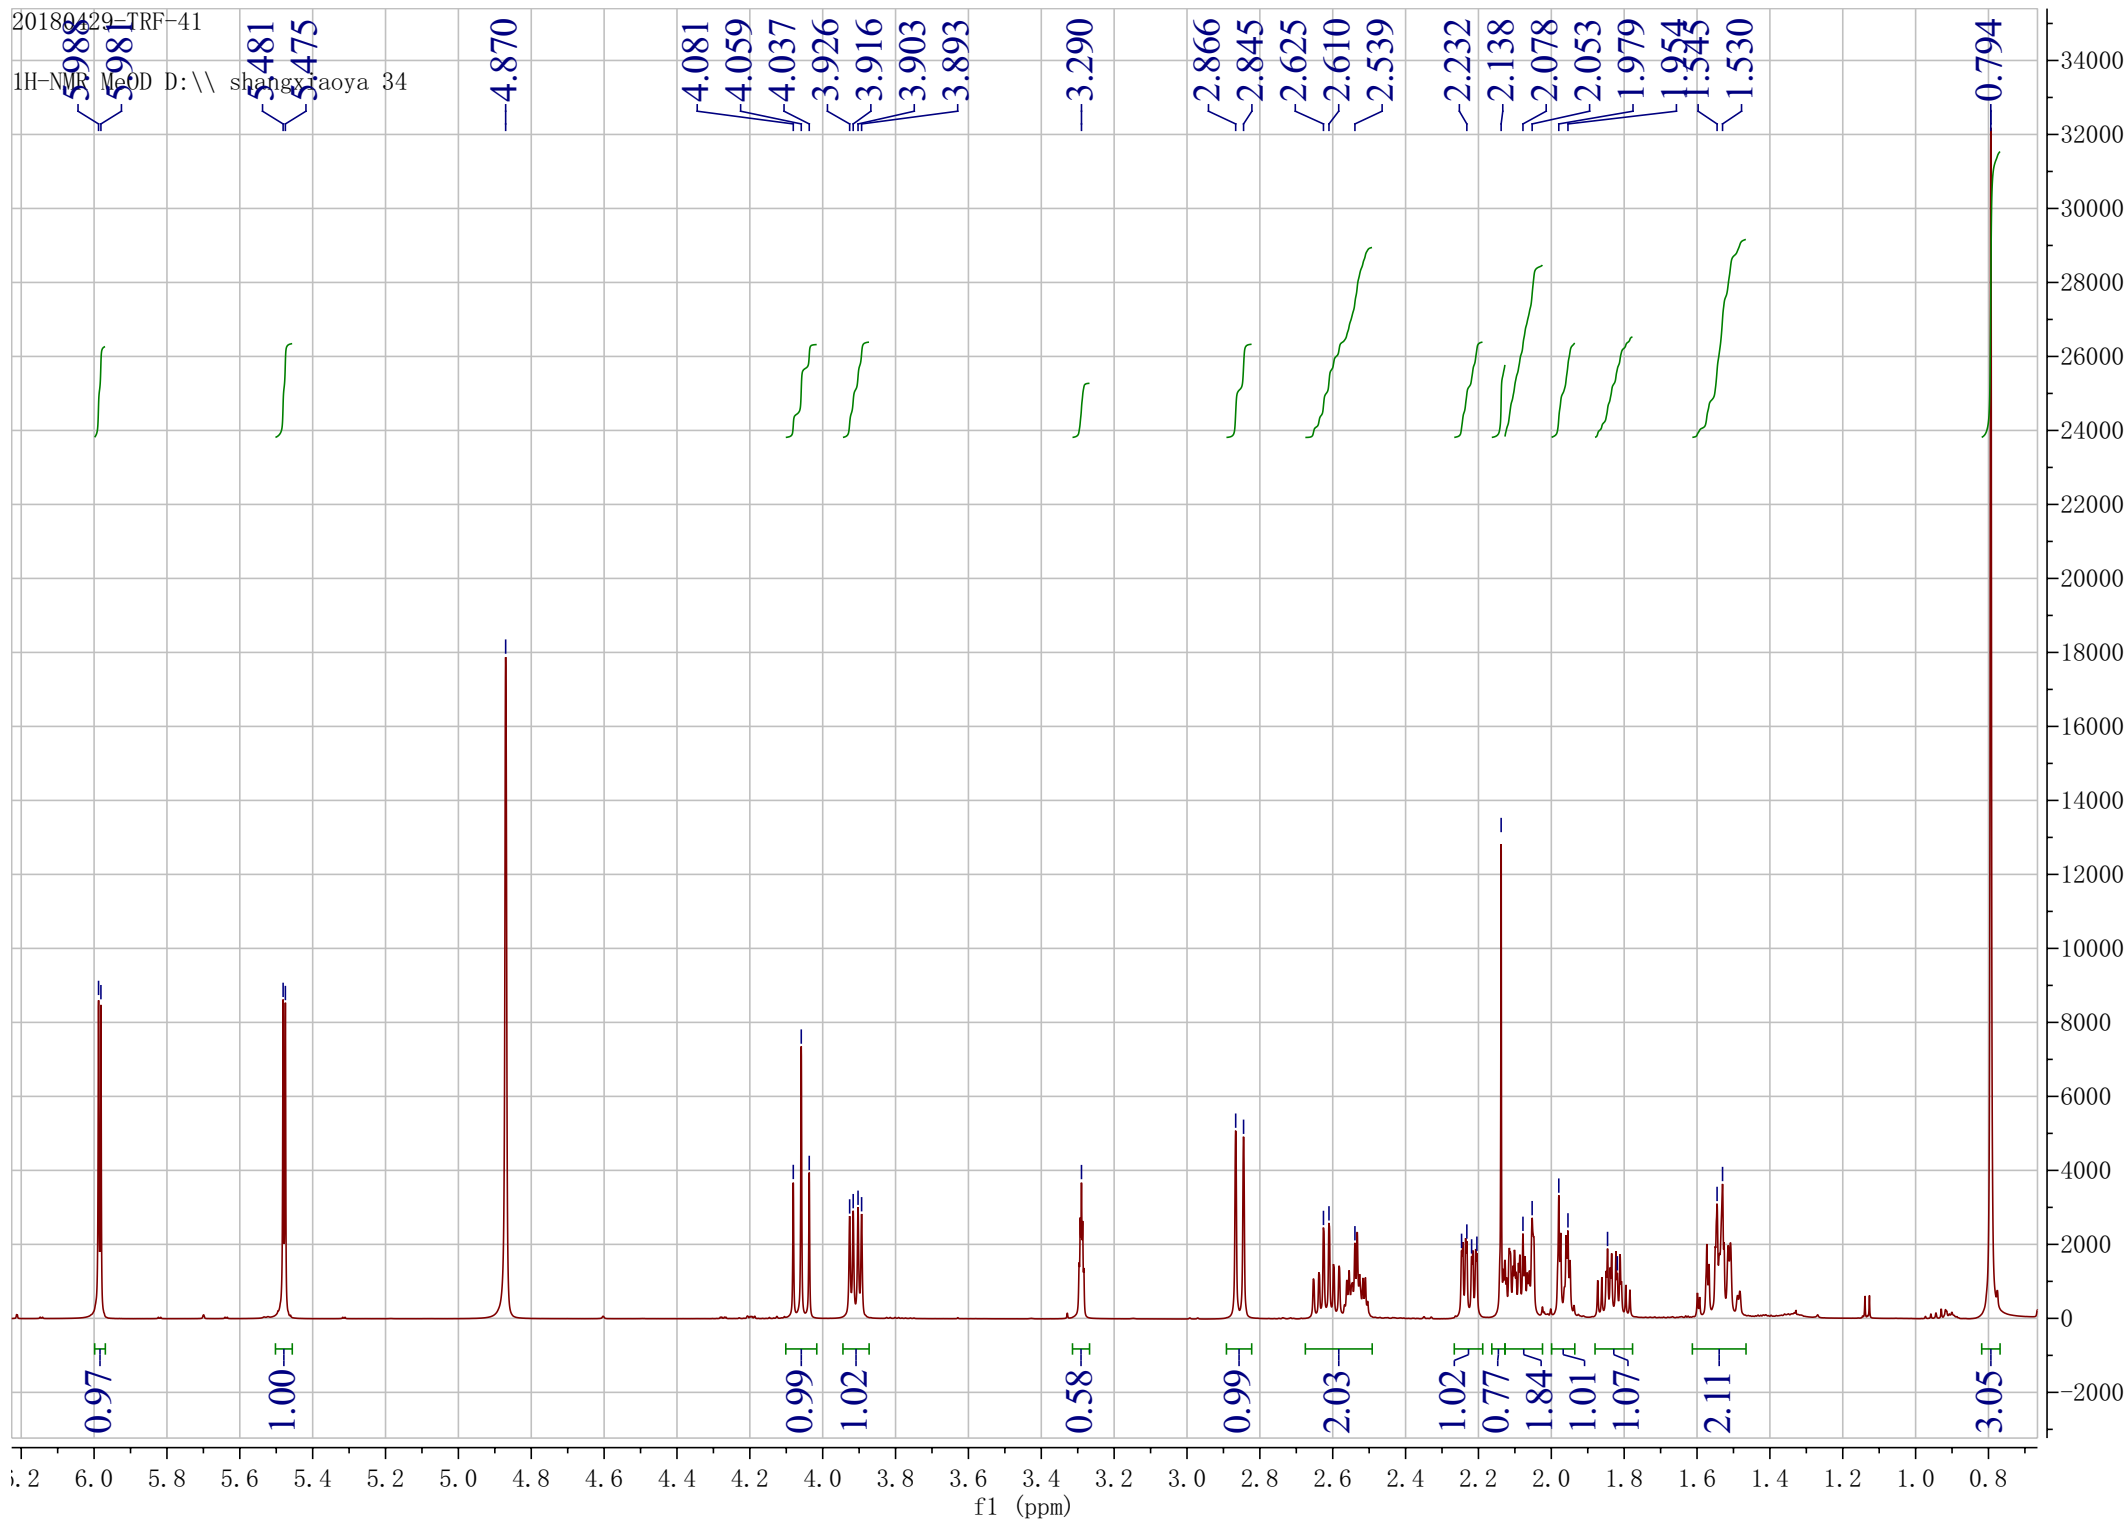

Supplement: s1 [file s1]

20180429-TRF-43

<sup>13</sup>C-NMR MeOD D:\ shangxiaoya 36

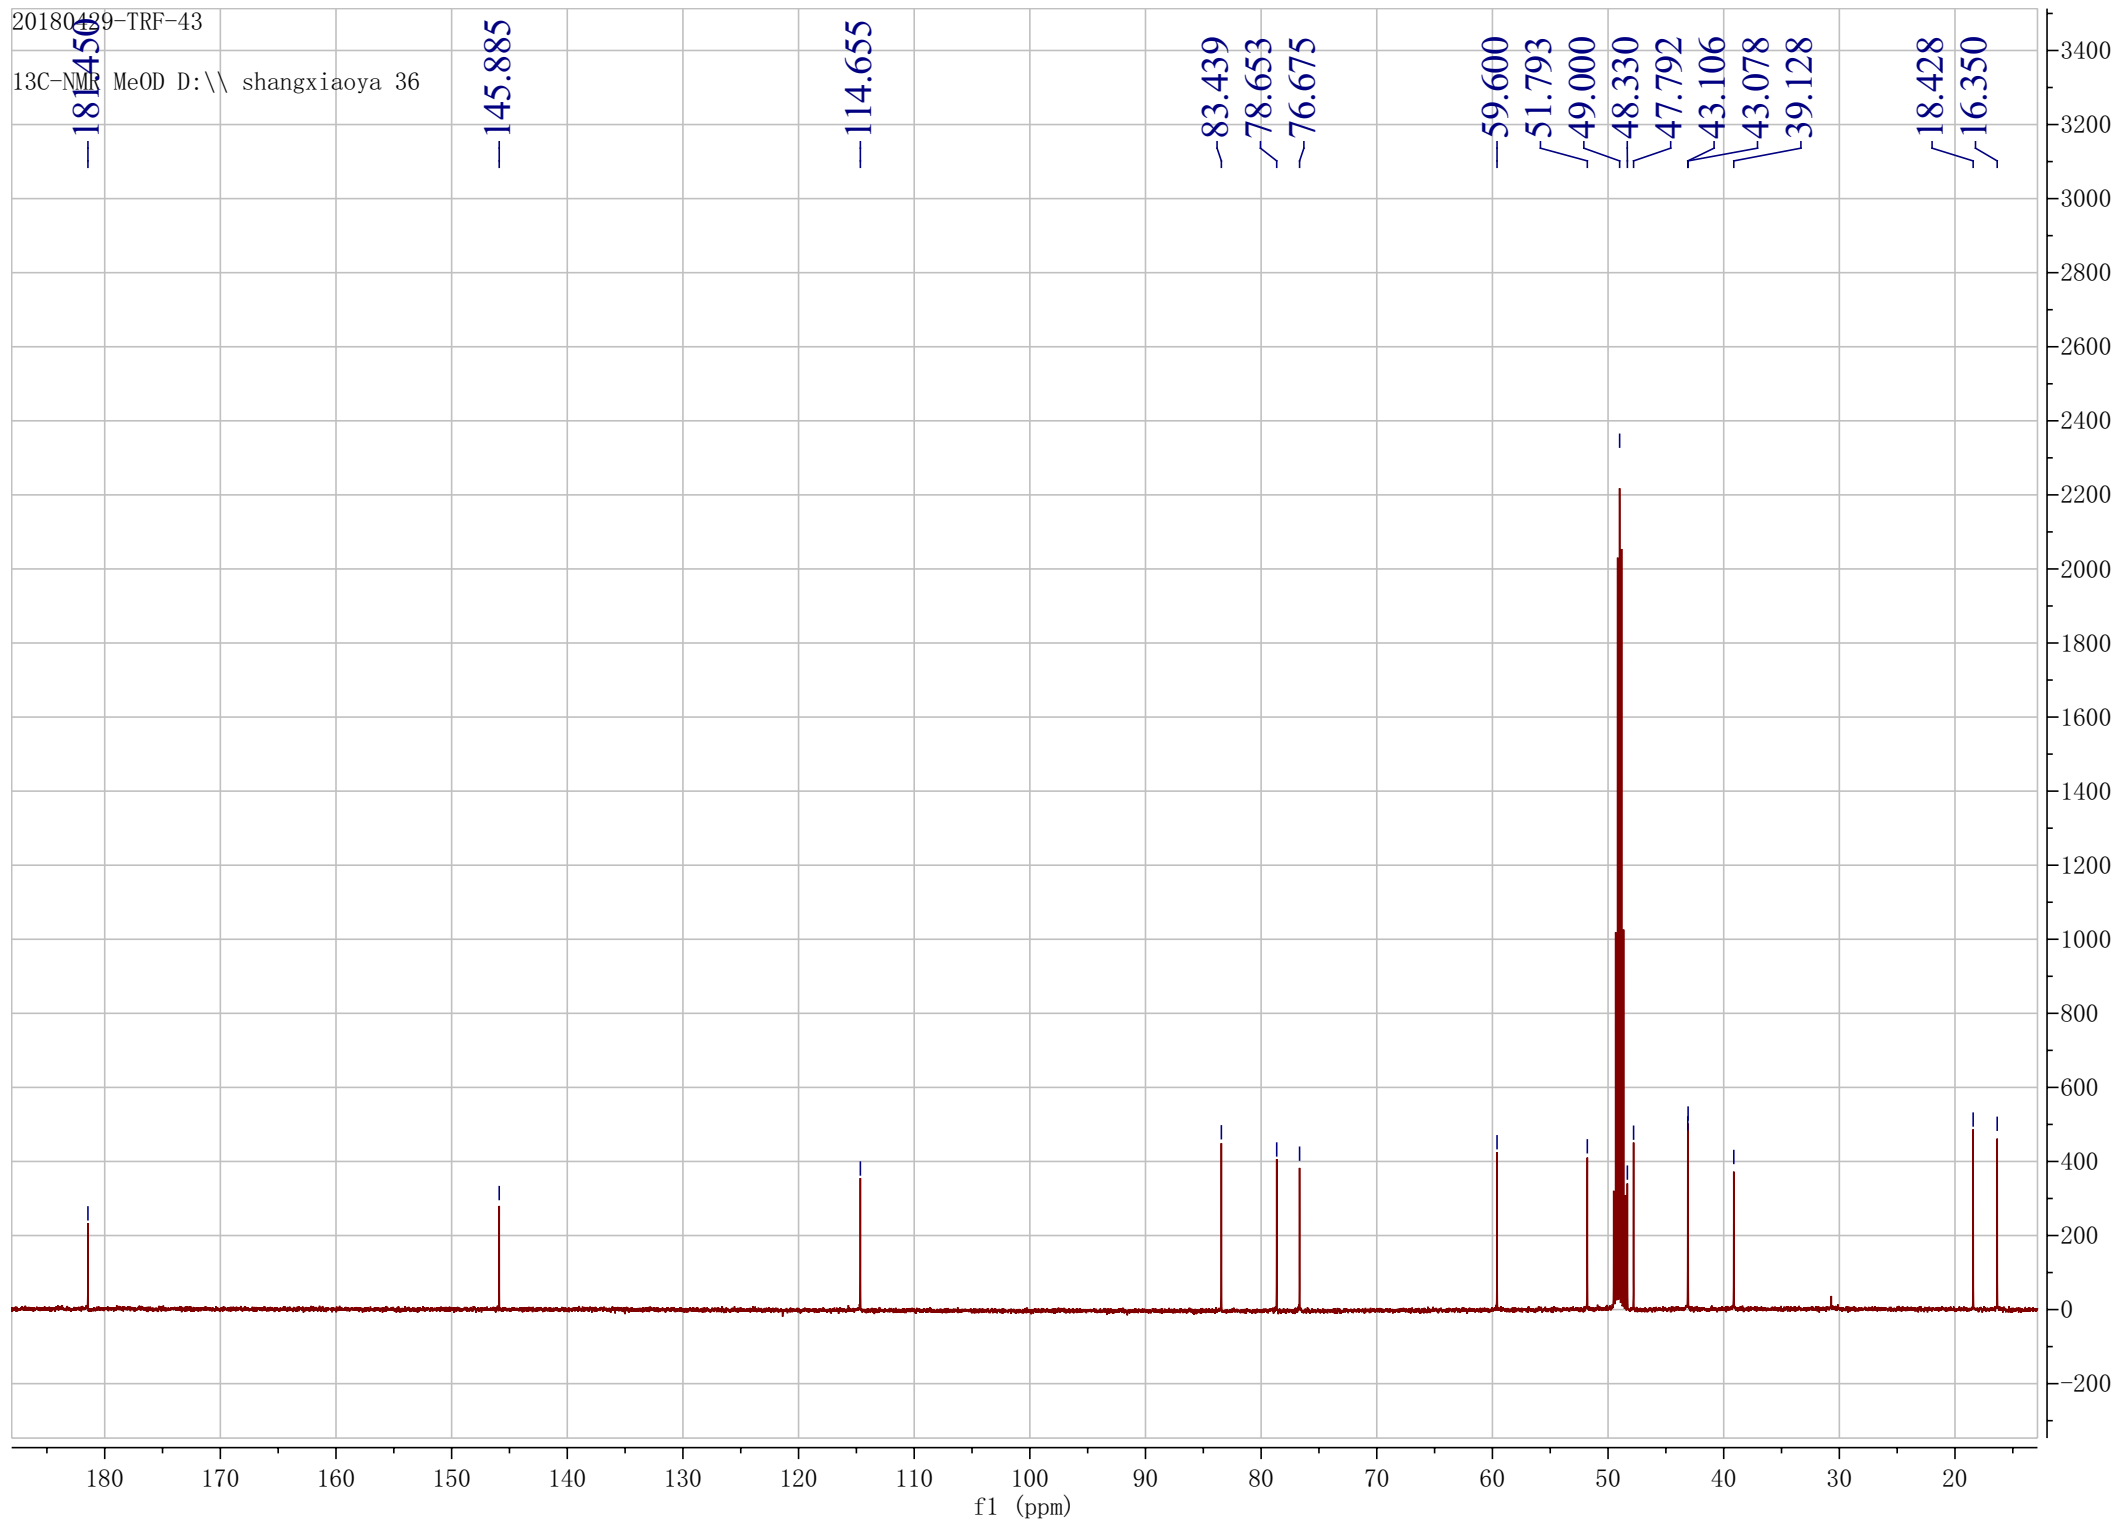

Supplement: s1 [file s1]

20170908-TRF-25  
BRUKER AVIII-500 13C-NMR TRF-25 IN DMSO 2017.09.08  
13C-NMR DMSO D:\shangxiaoya 17

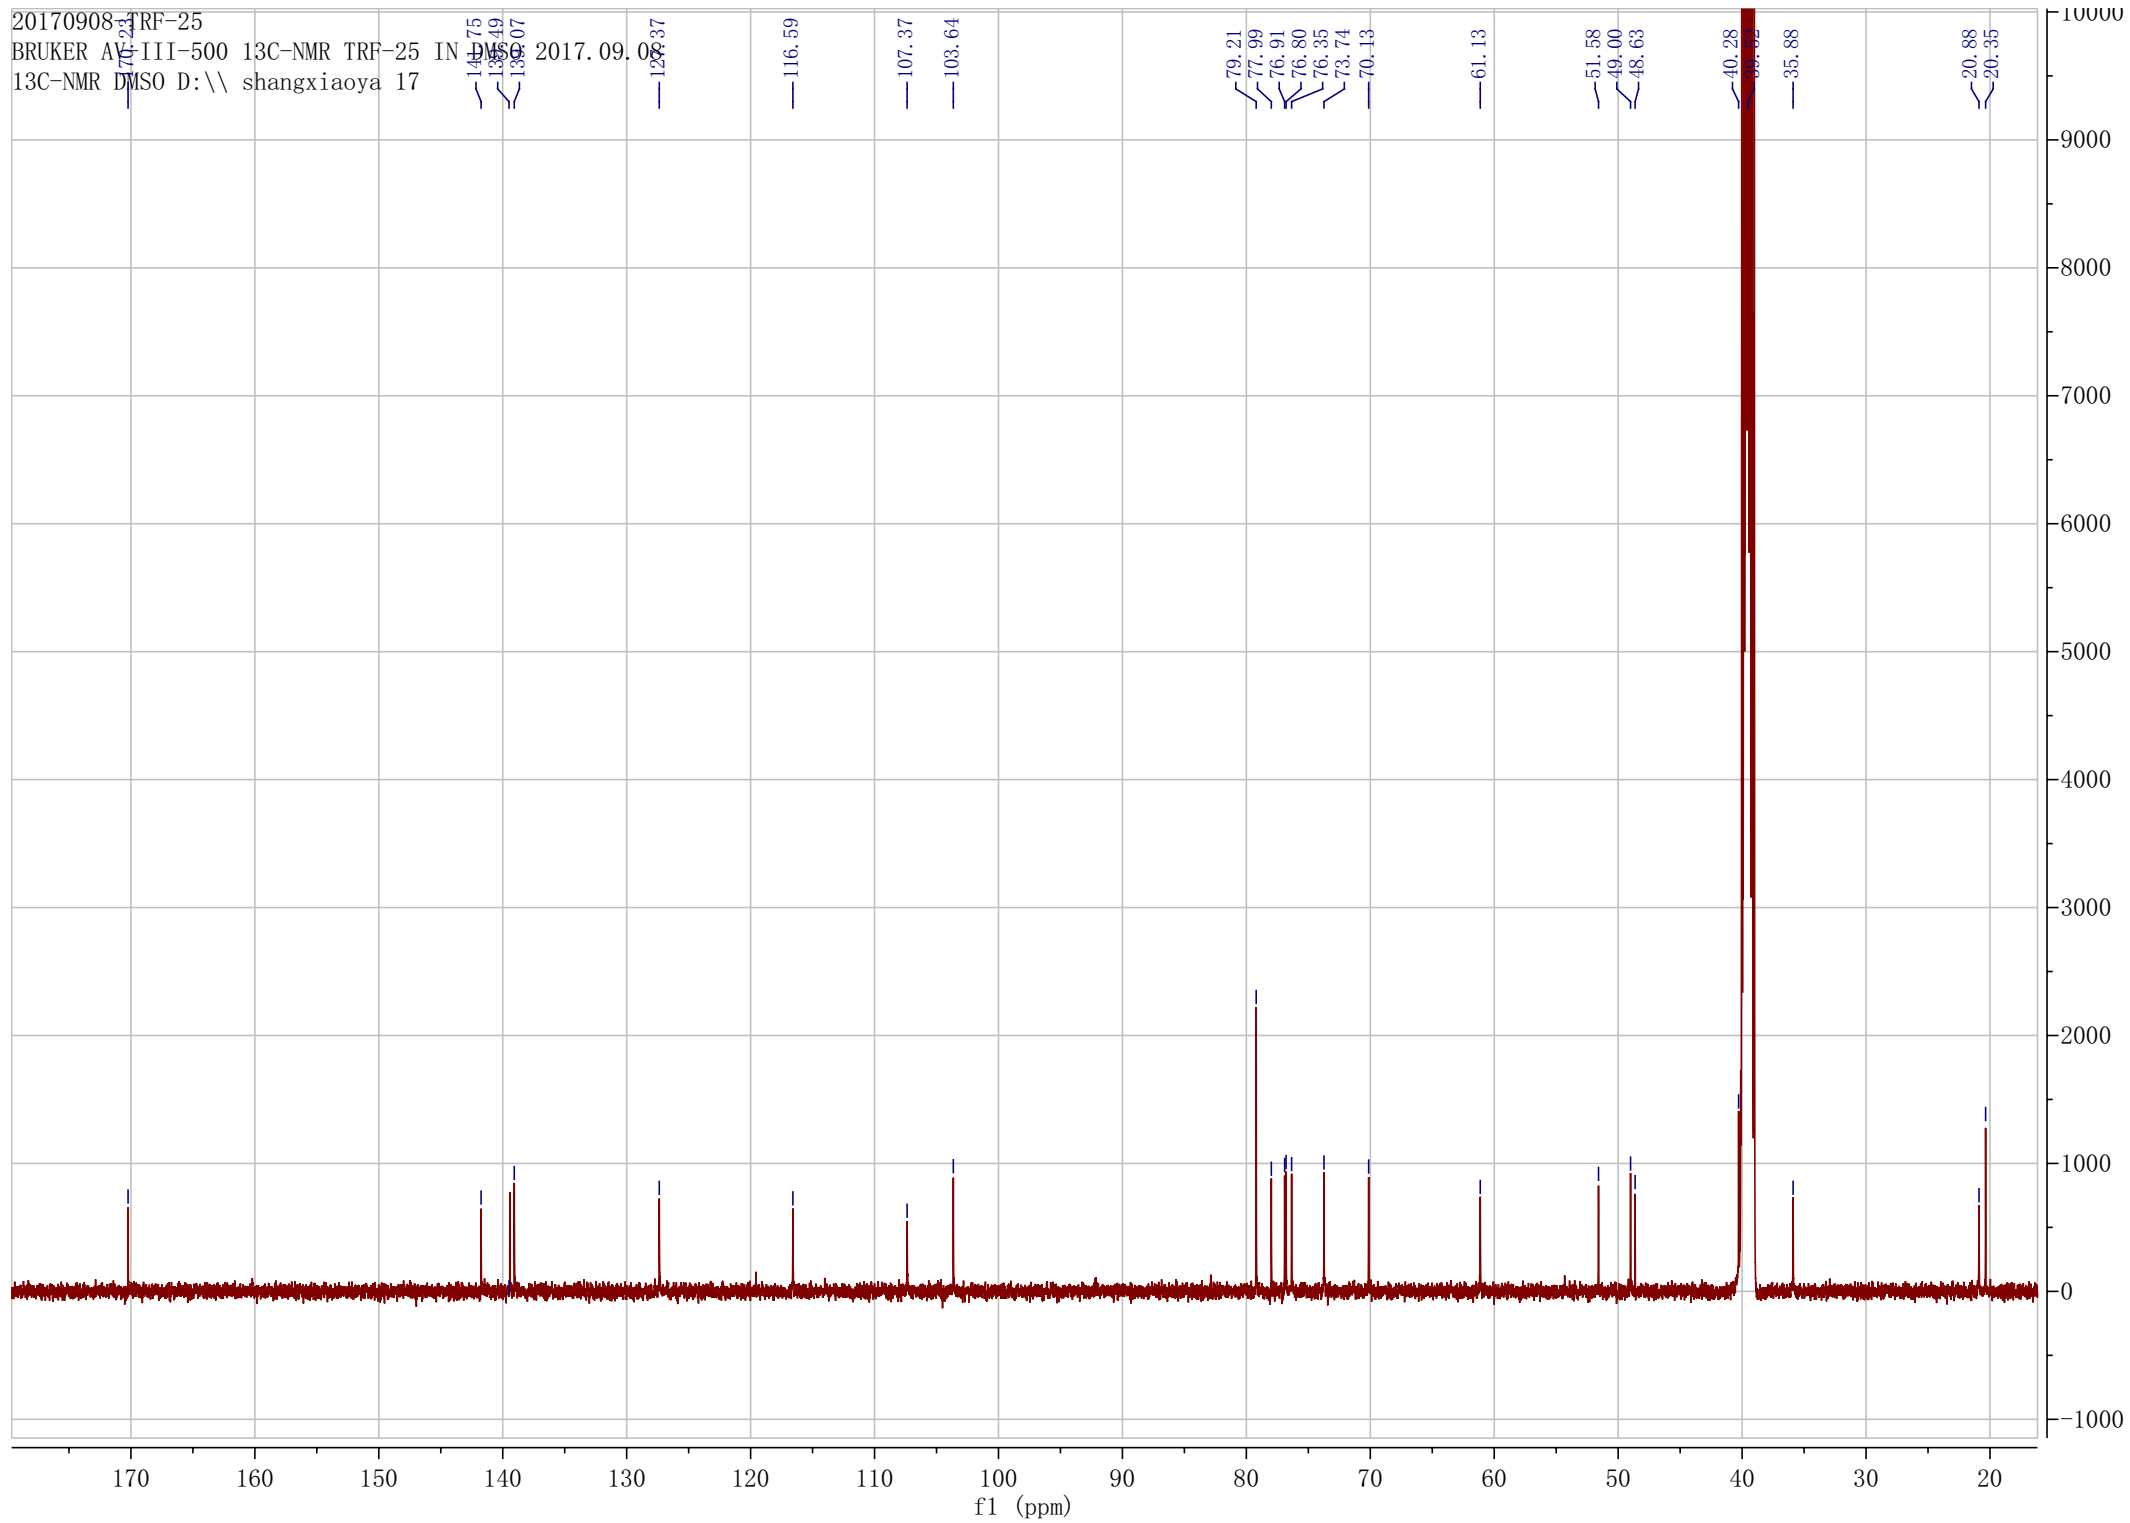

Supplement: s1 [file s1]

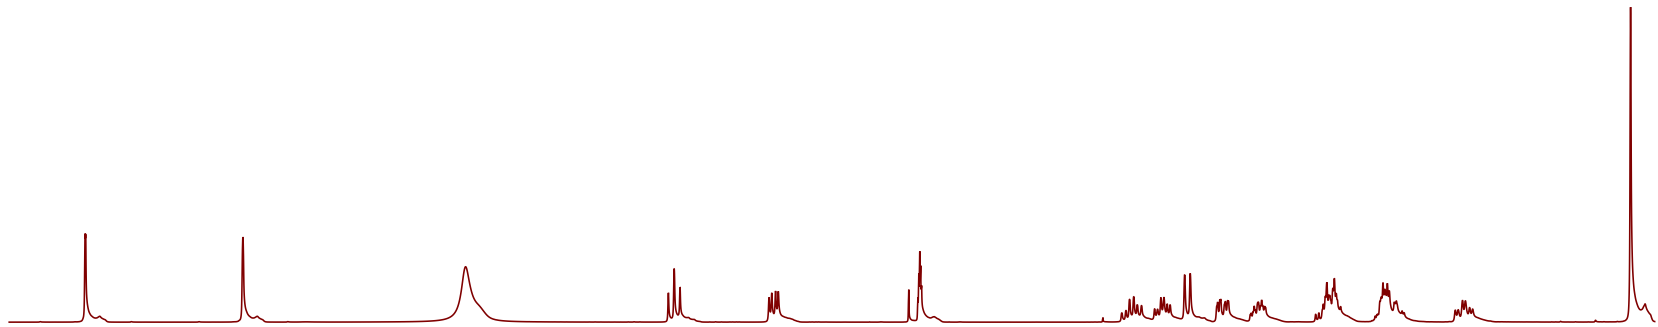

20171101-TRF-29  
BRUKER AV-III-500 COSY-NMR TRF-29 IN DMSO 2017.11.01  
HSQCETGPGSI DMSO D:\\ shangxiaoya 12

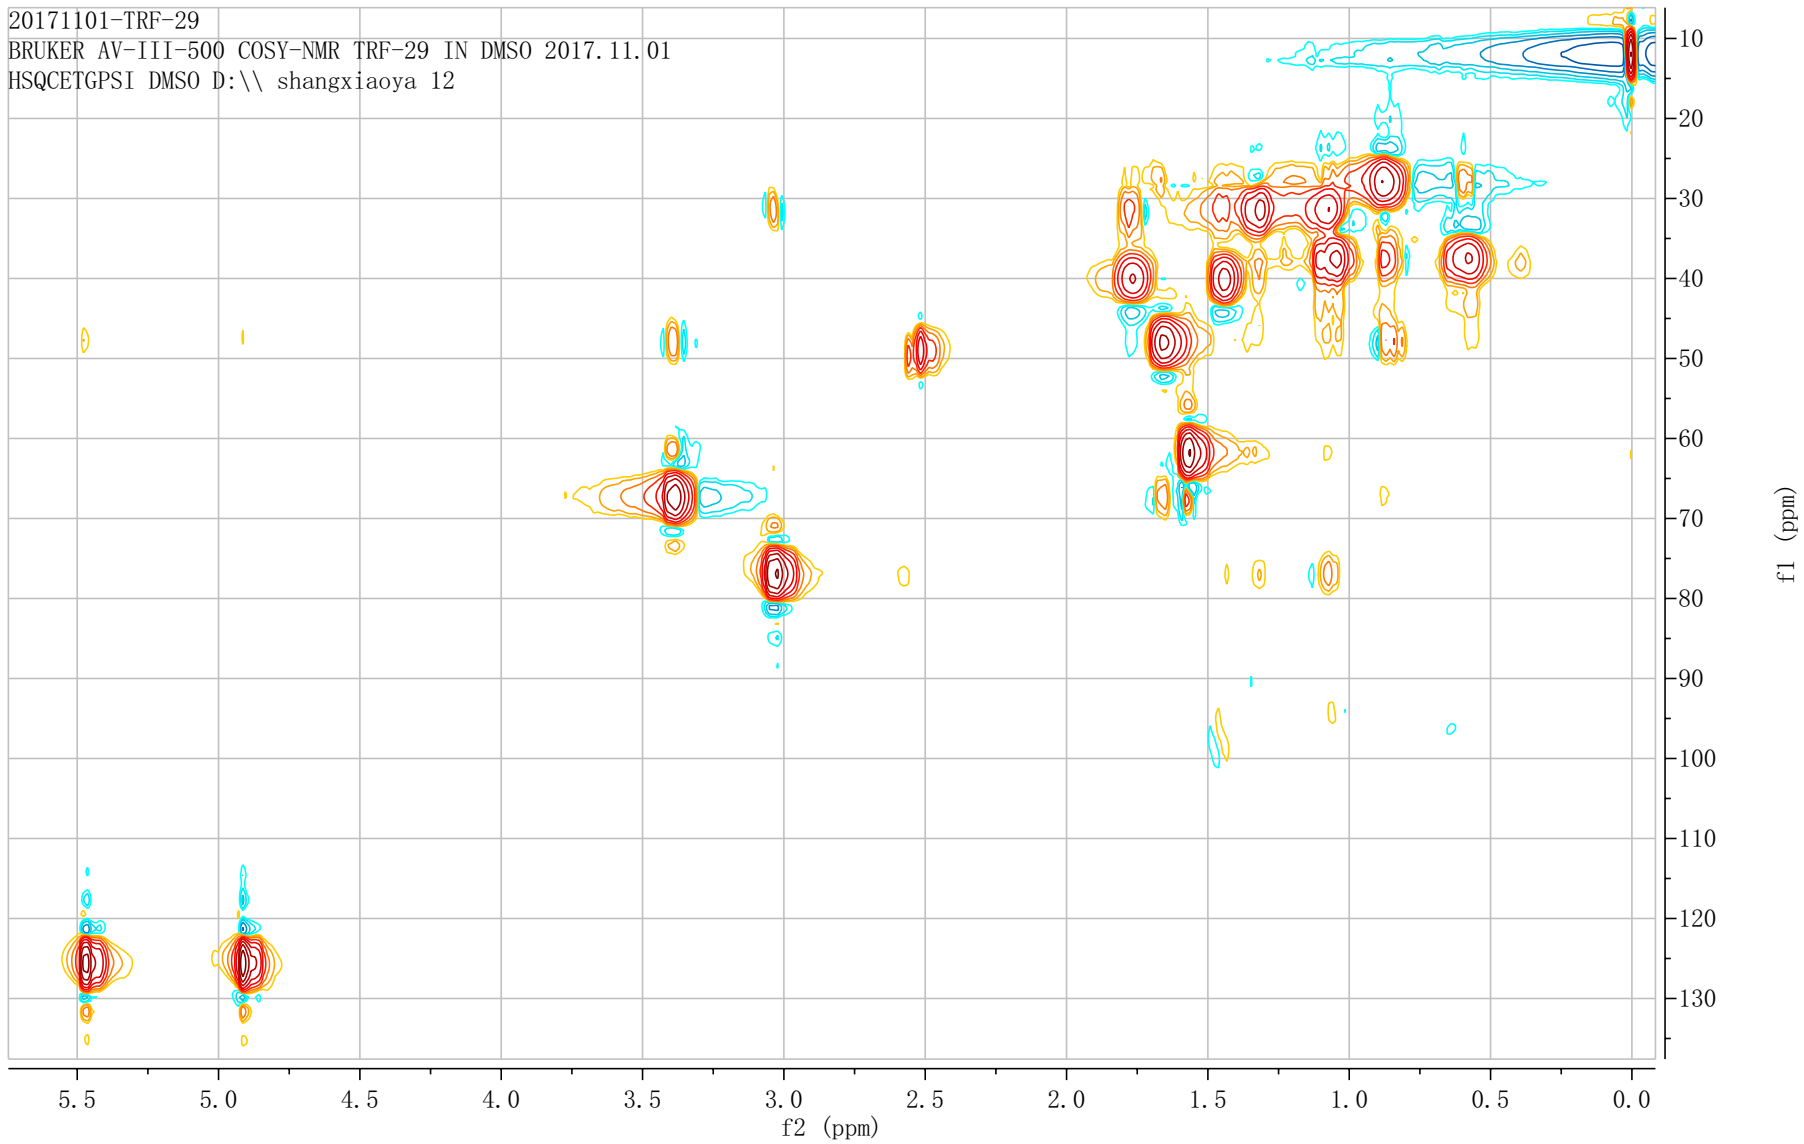

Supplement: s1 [file s1]

20171218-TRF-40  
BRUKER AV-III-500 13C NMR TRF-40 IN CD3OD 2017.11.2  
13C NMR MeOD D:\\ shangxiaoya 17

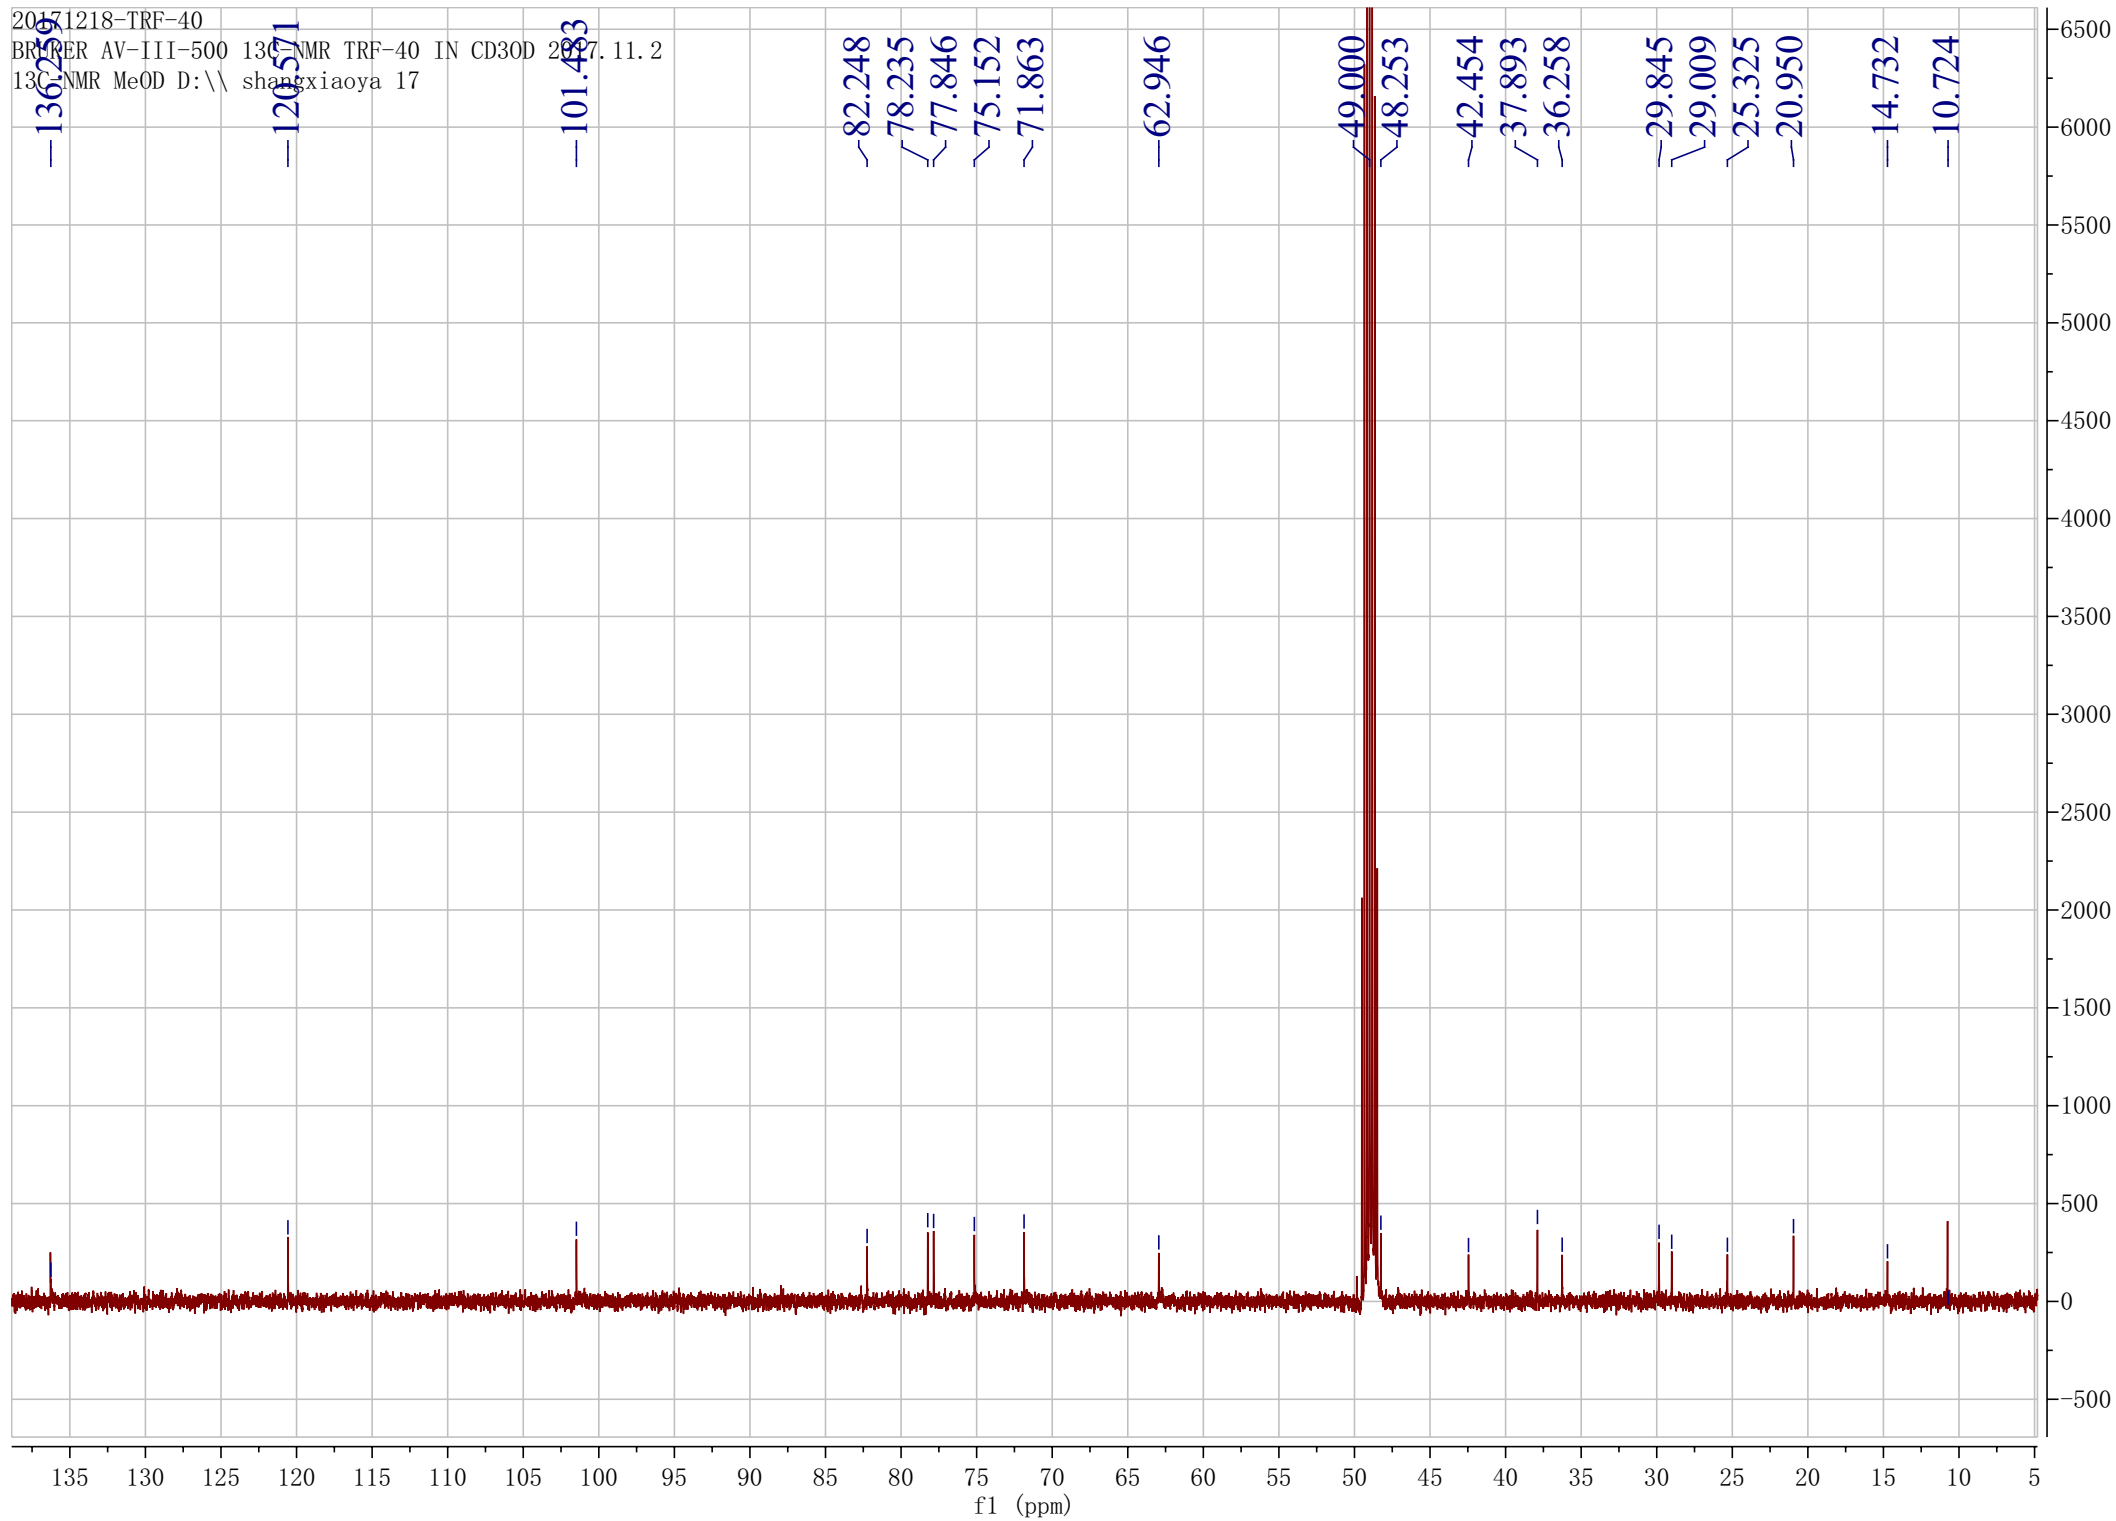

Supplement: s1 [file s1]

20190128-TRF-29

ROESYPHSW MeOD D:\\ shangxiaoya 37

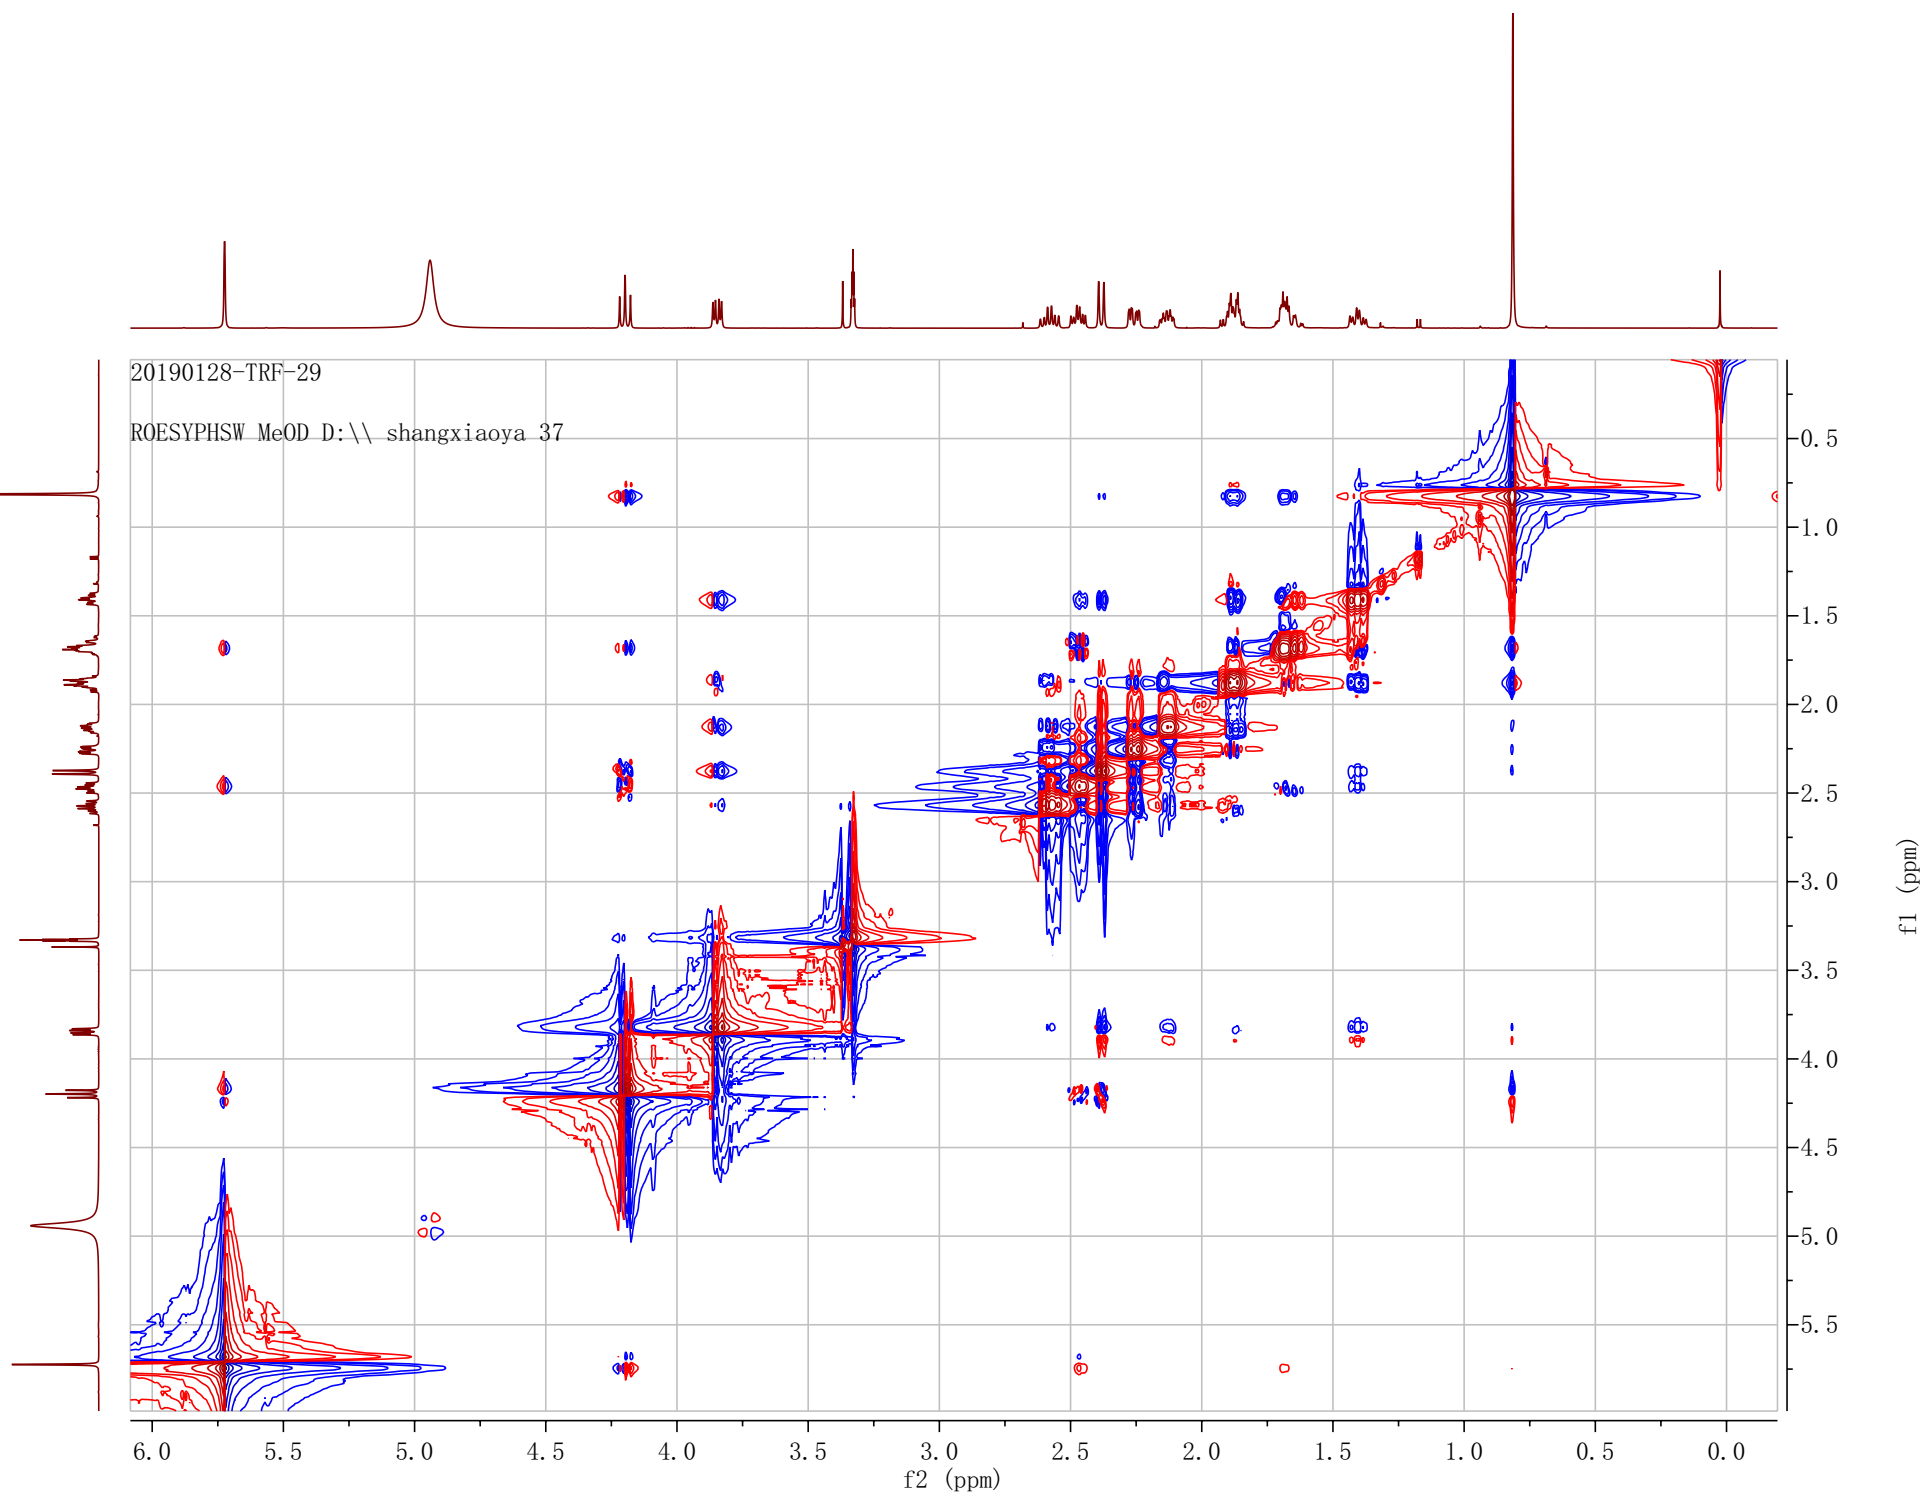

Supplement: s1 [file s1]

TRF-40\_HC\_Pos\_FullIMS#1001 RT: 4.38 AV: 1 NL: 6.19E6  
T: FTMS + p ESI Full ms [100.0000-750.0000]

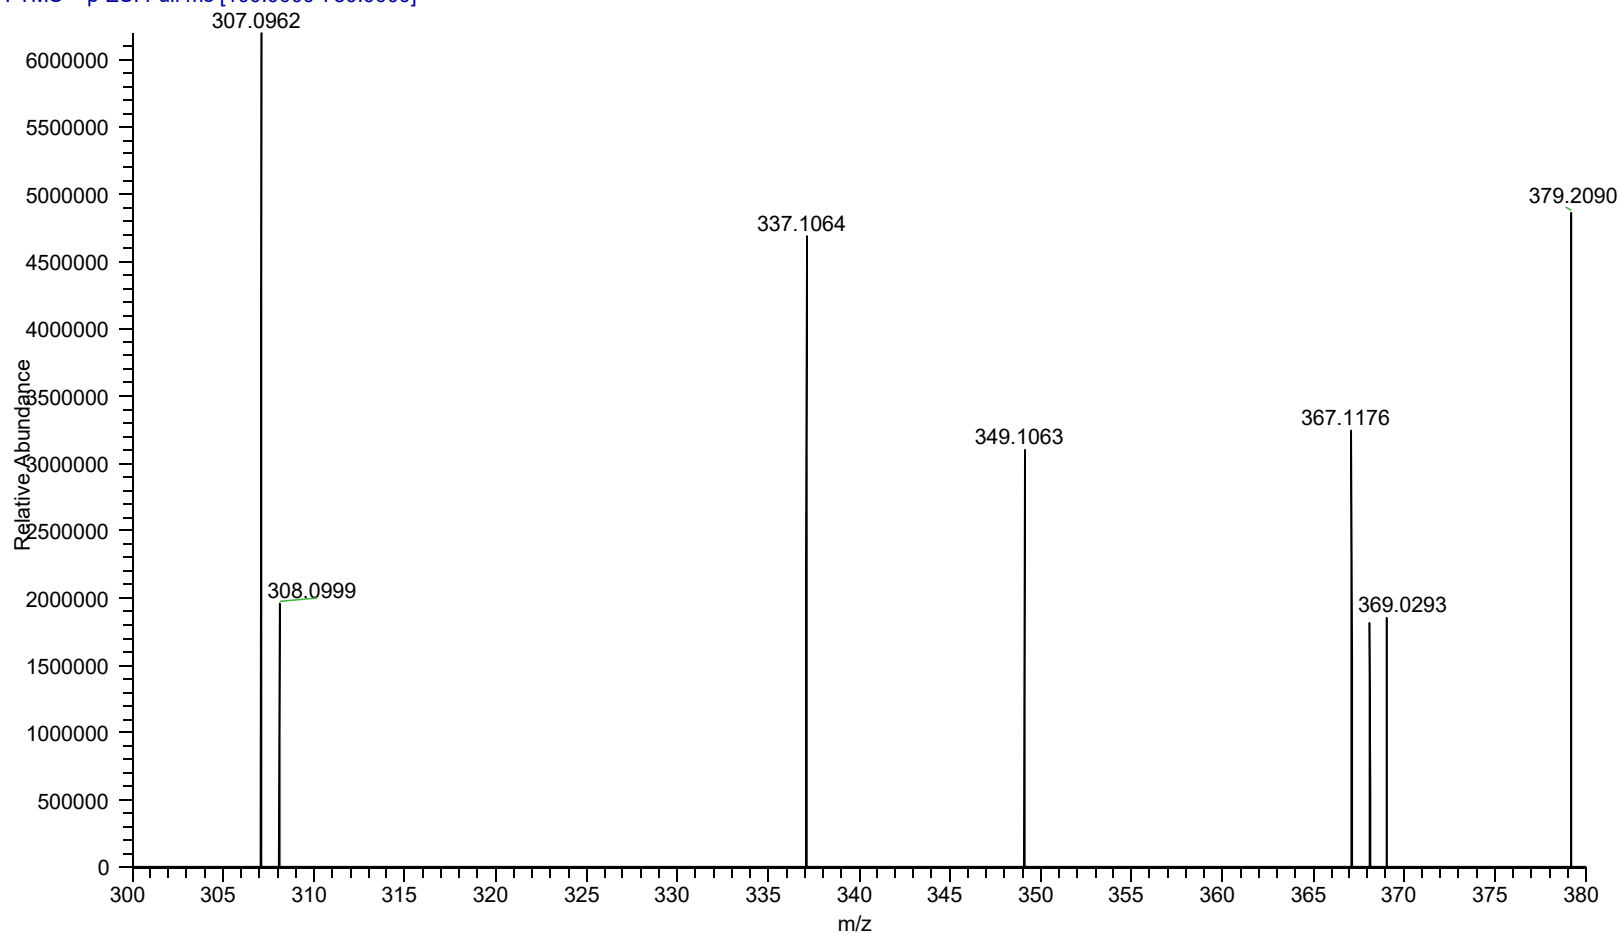

Supplement: s1 [file s1]

20170908-TRF-29  
BRUKER AV-III-500 13C-NMR TRF-29 IN MeOD 2017.09.08  
13C-NMR MeOD D:\\ shangxiaoya 21

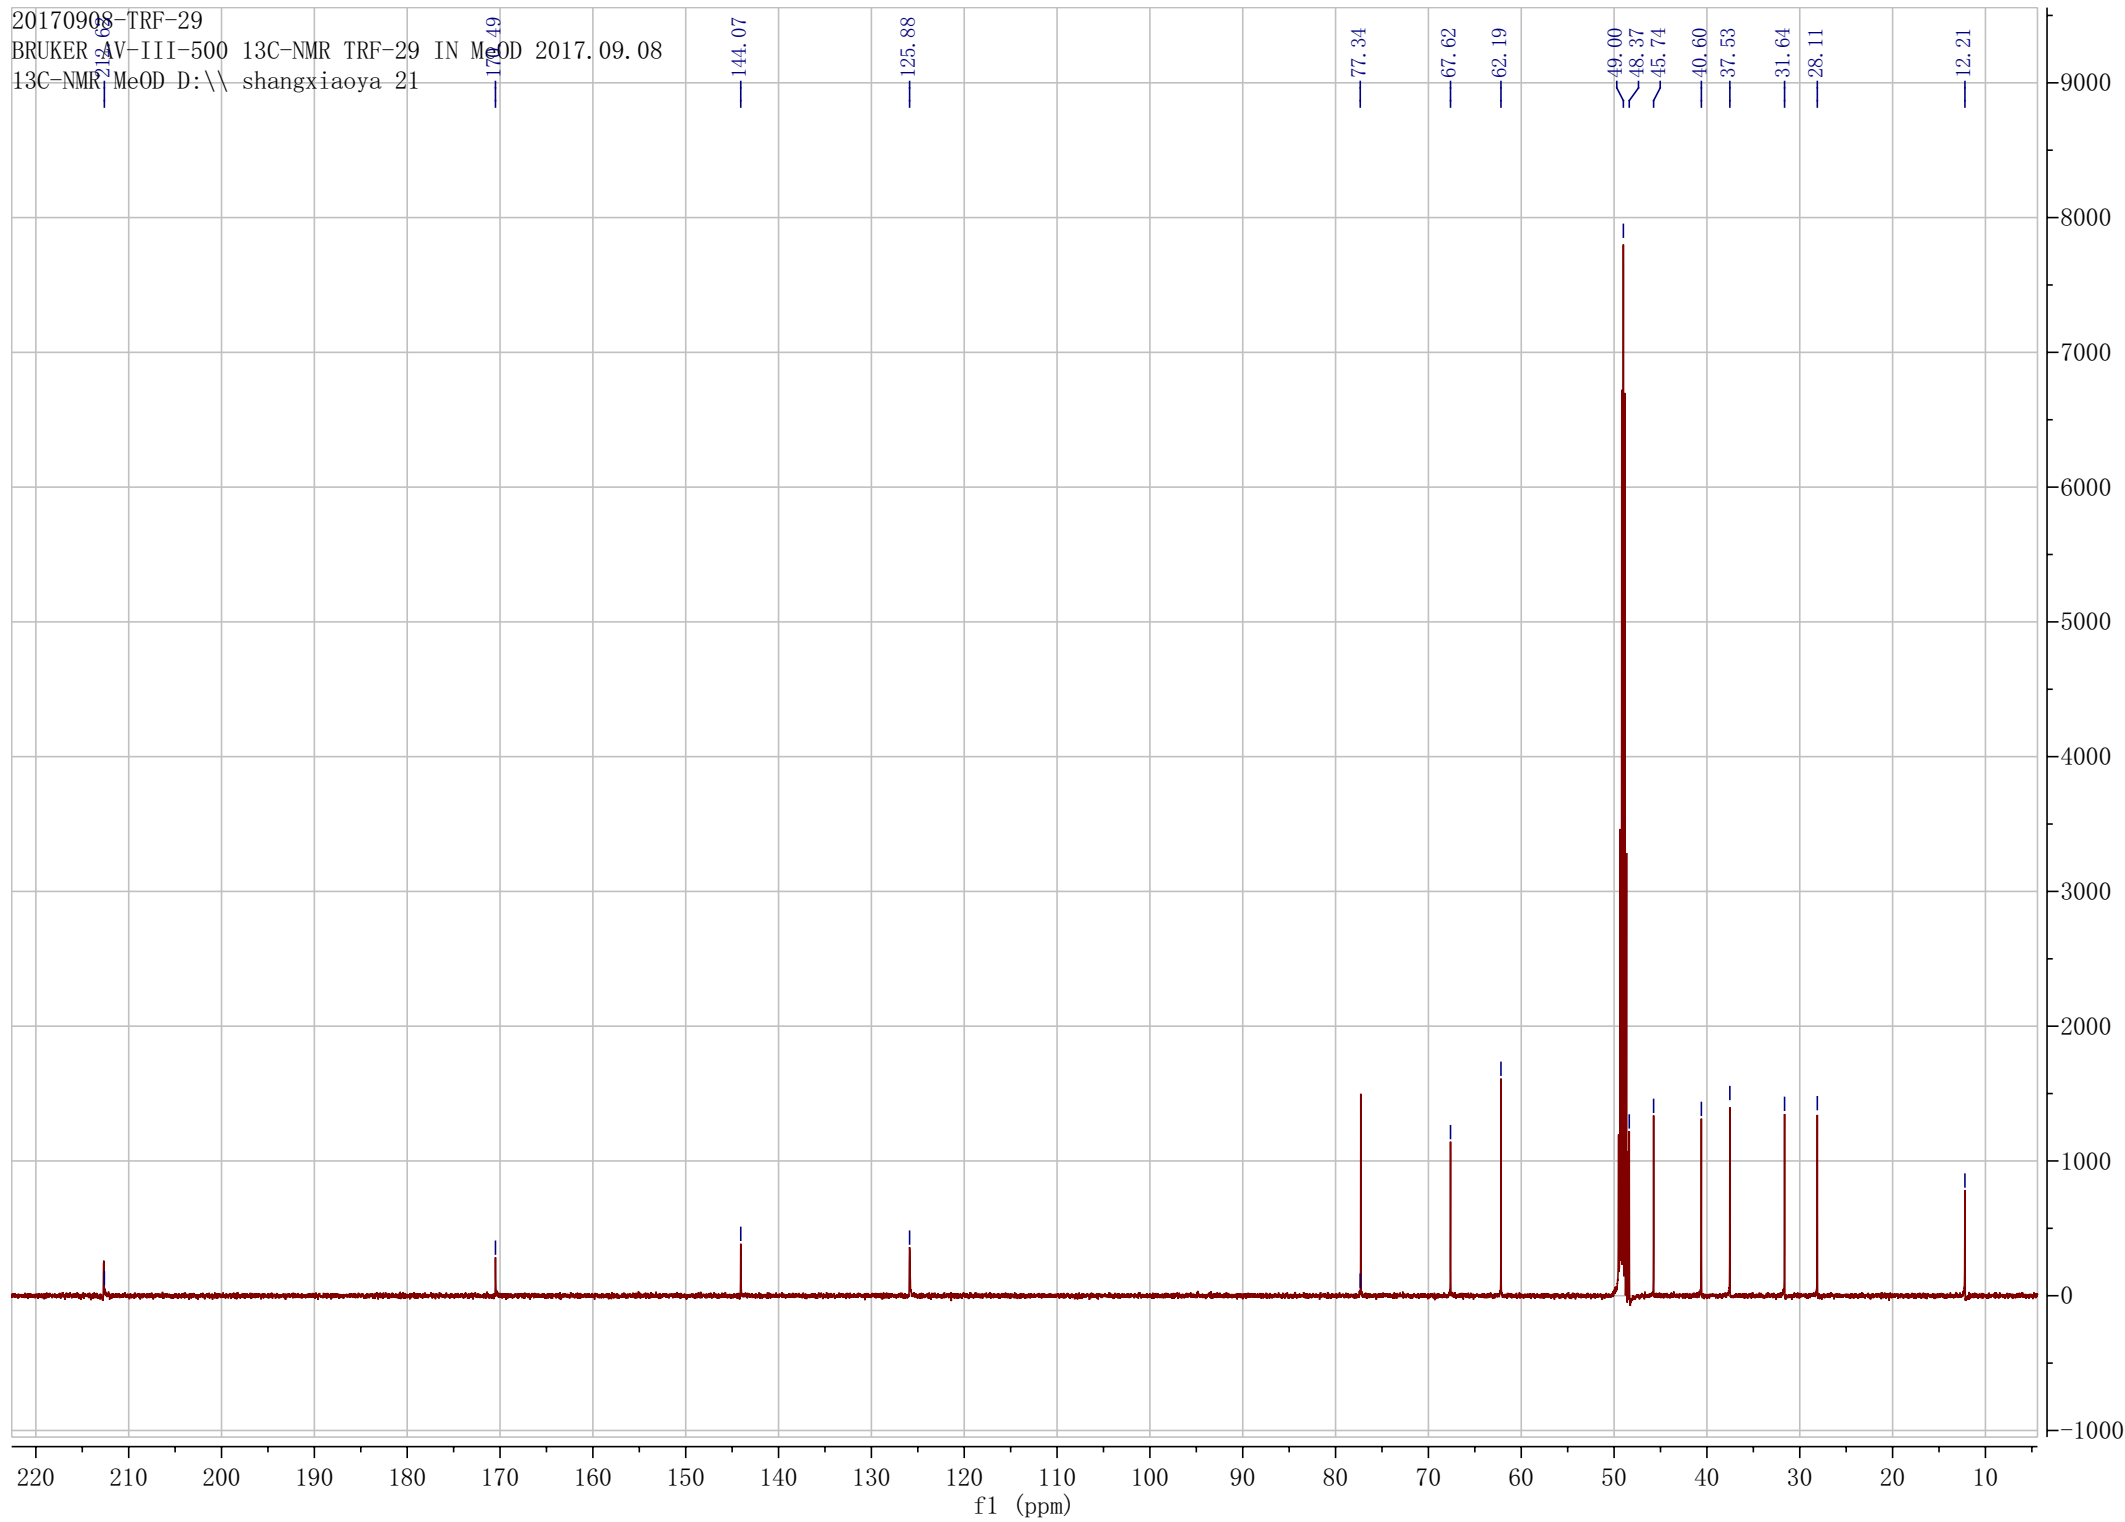

Supplement: s1 [file s1]

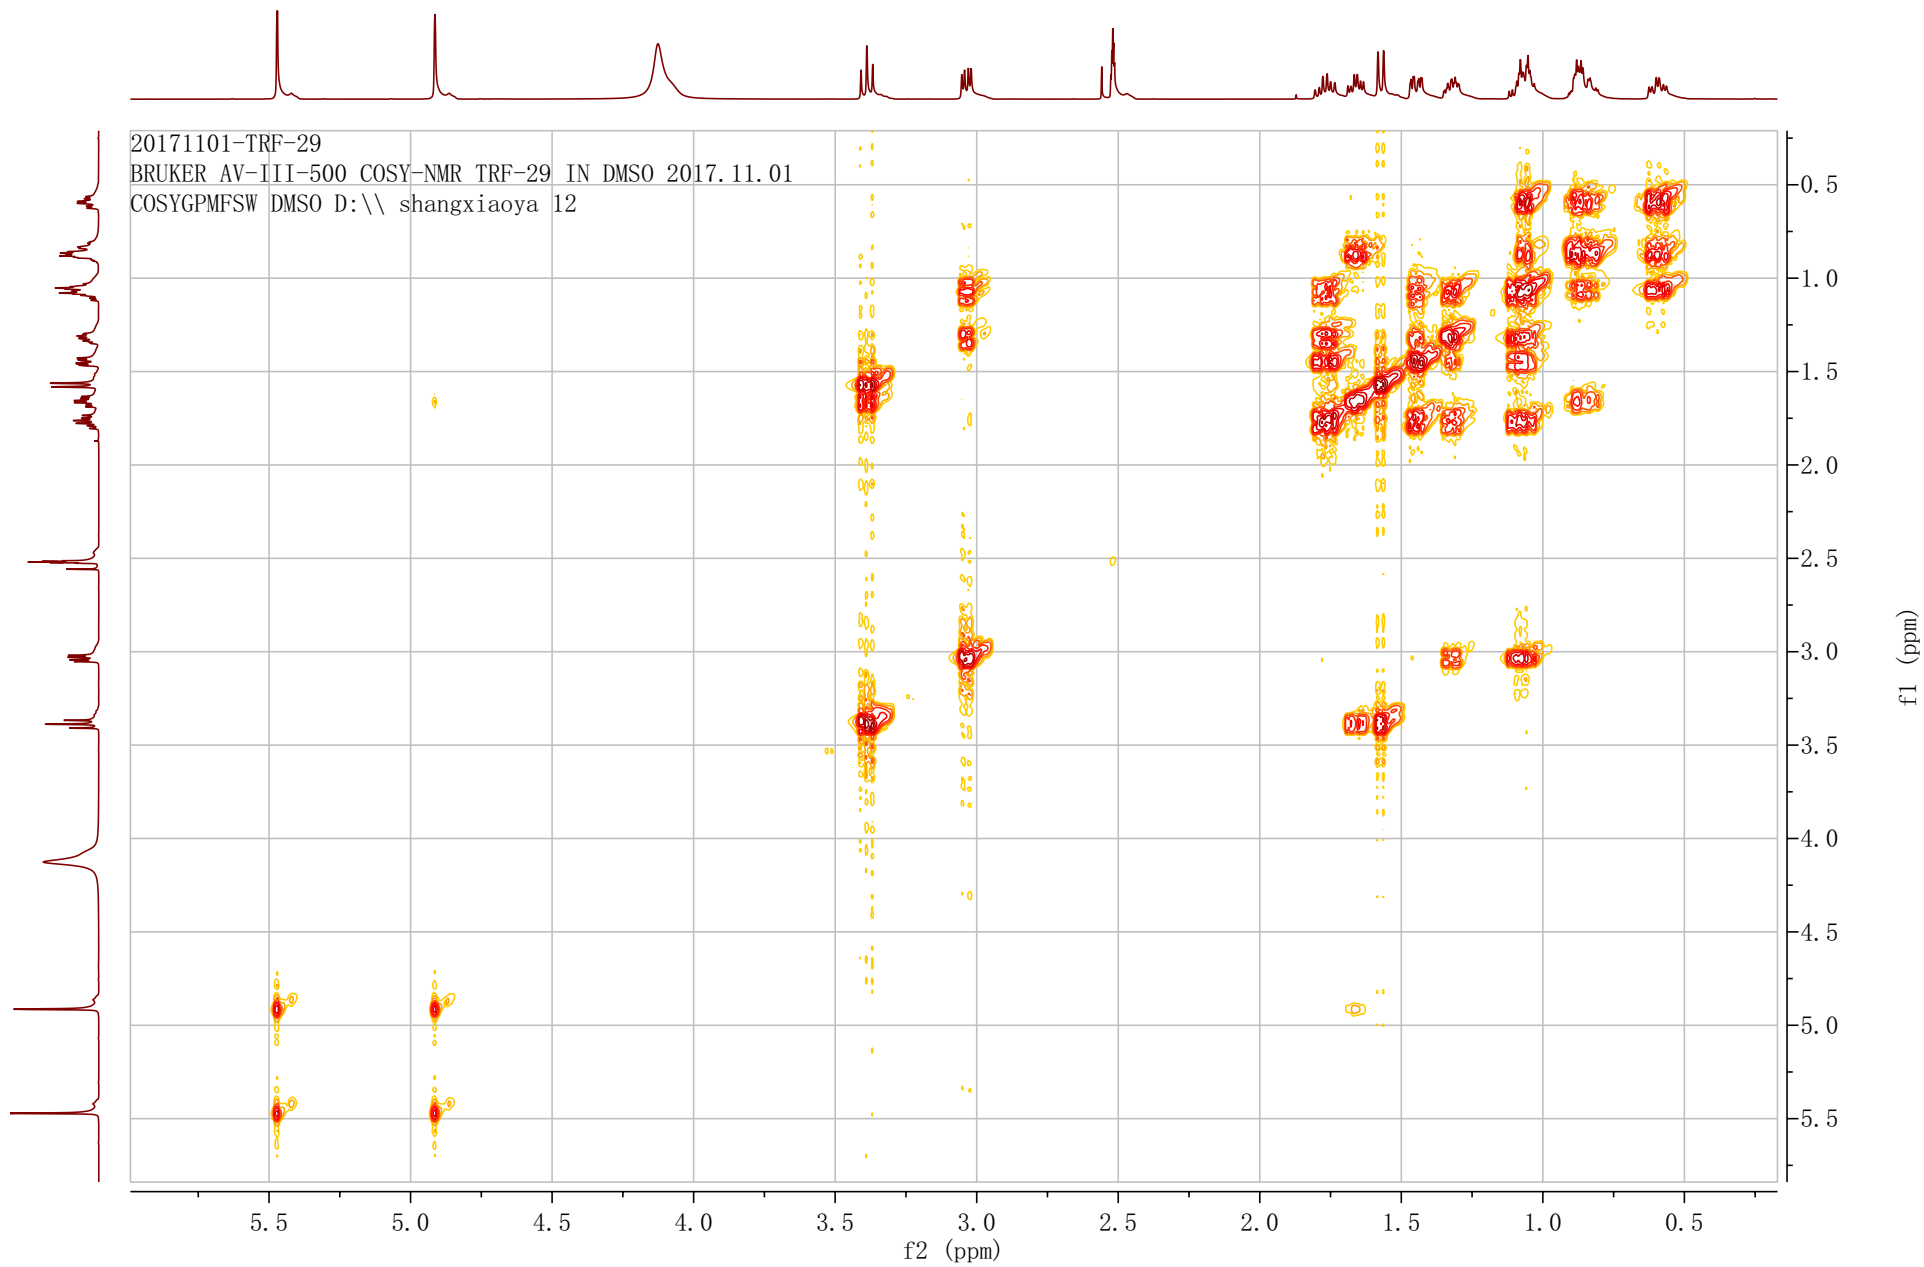

Supplement: s1 [file s1]

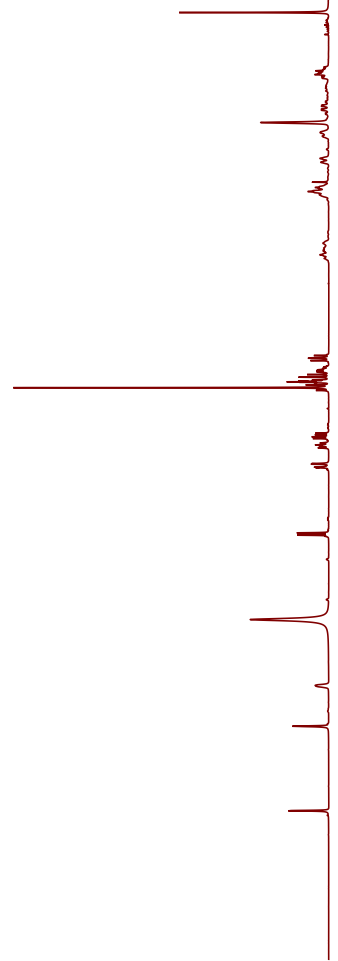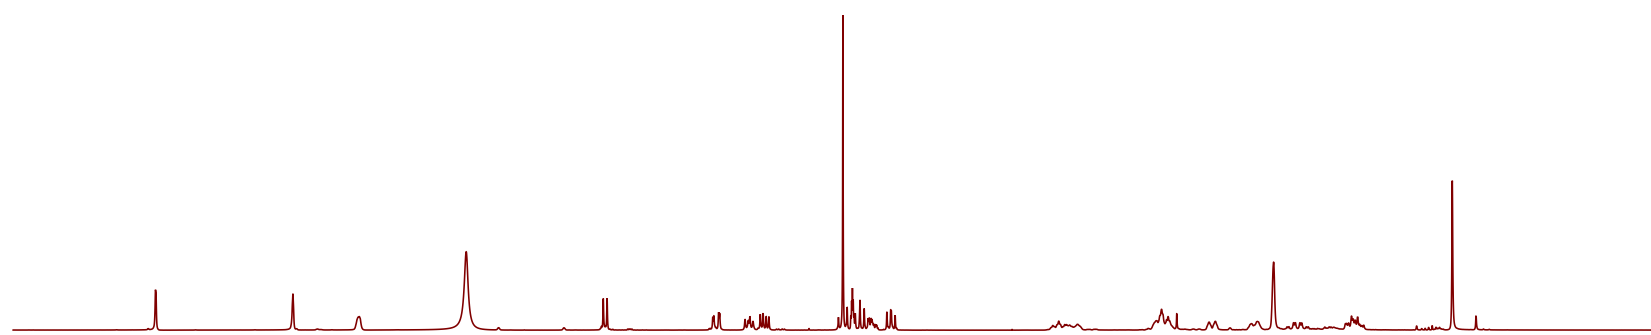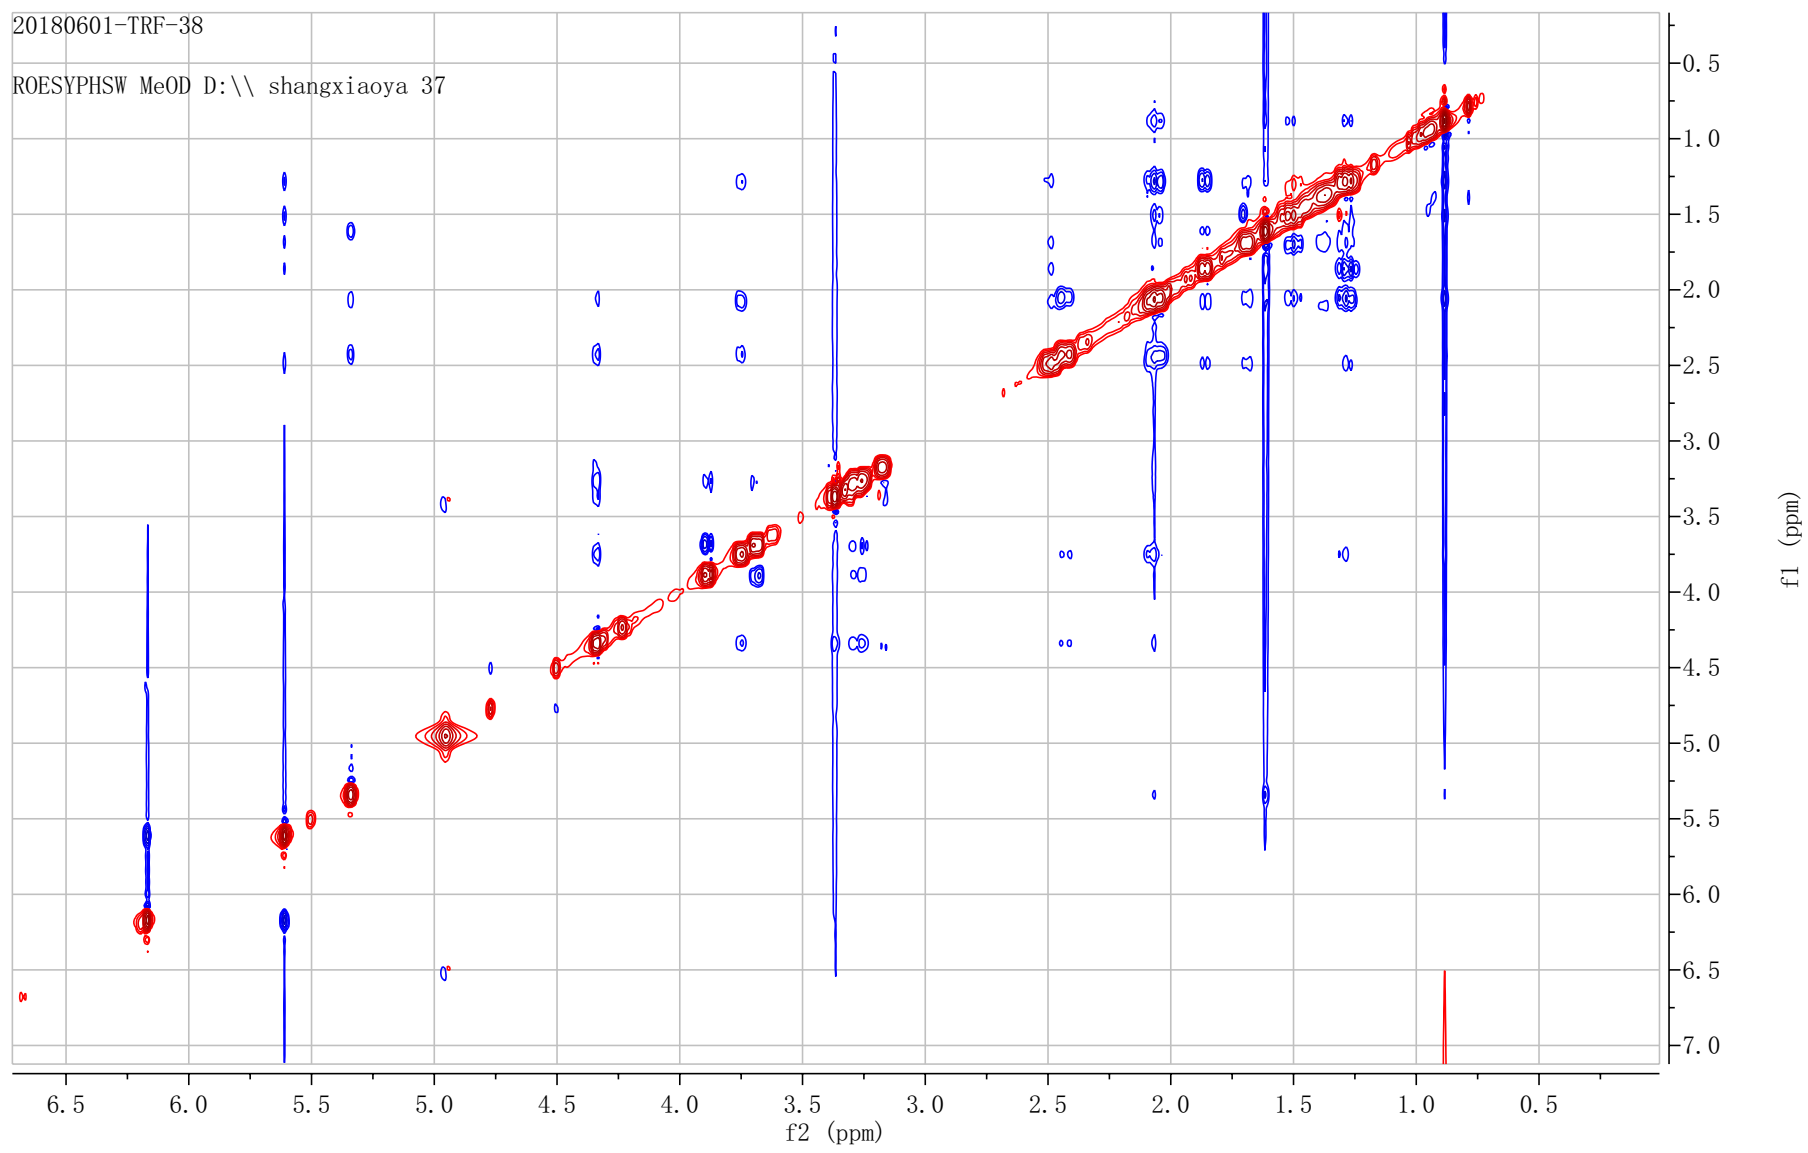

Supplement: s1 [file s1]

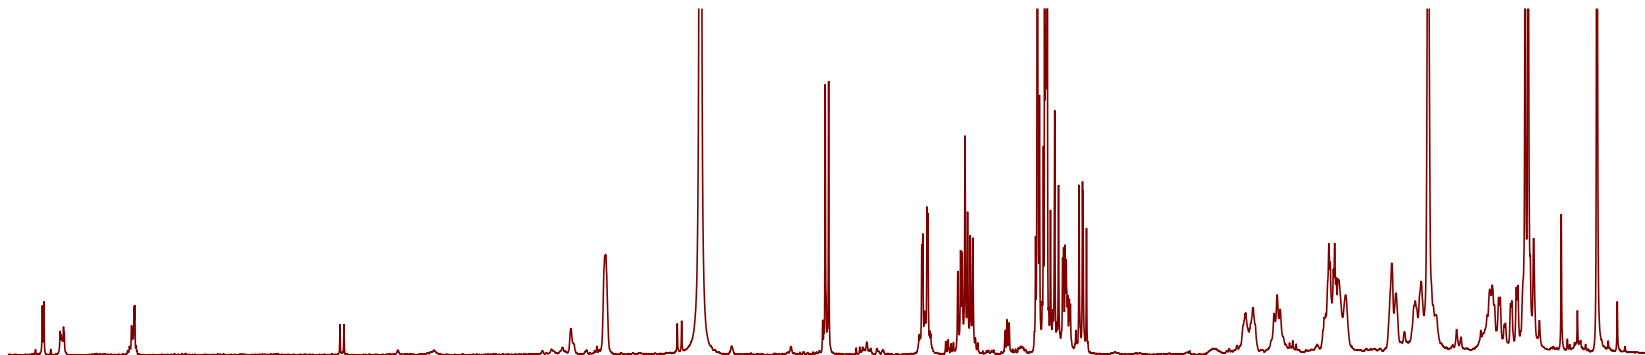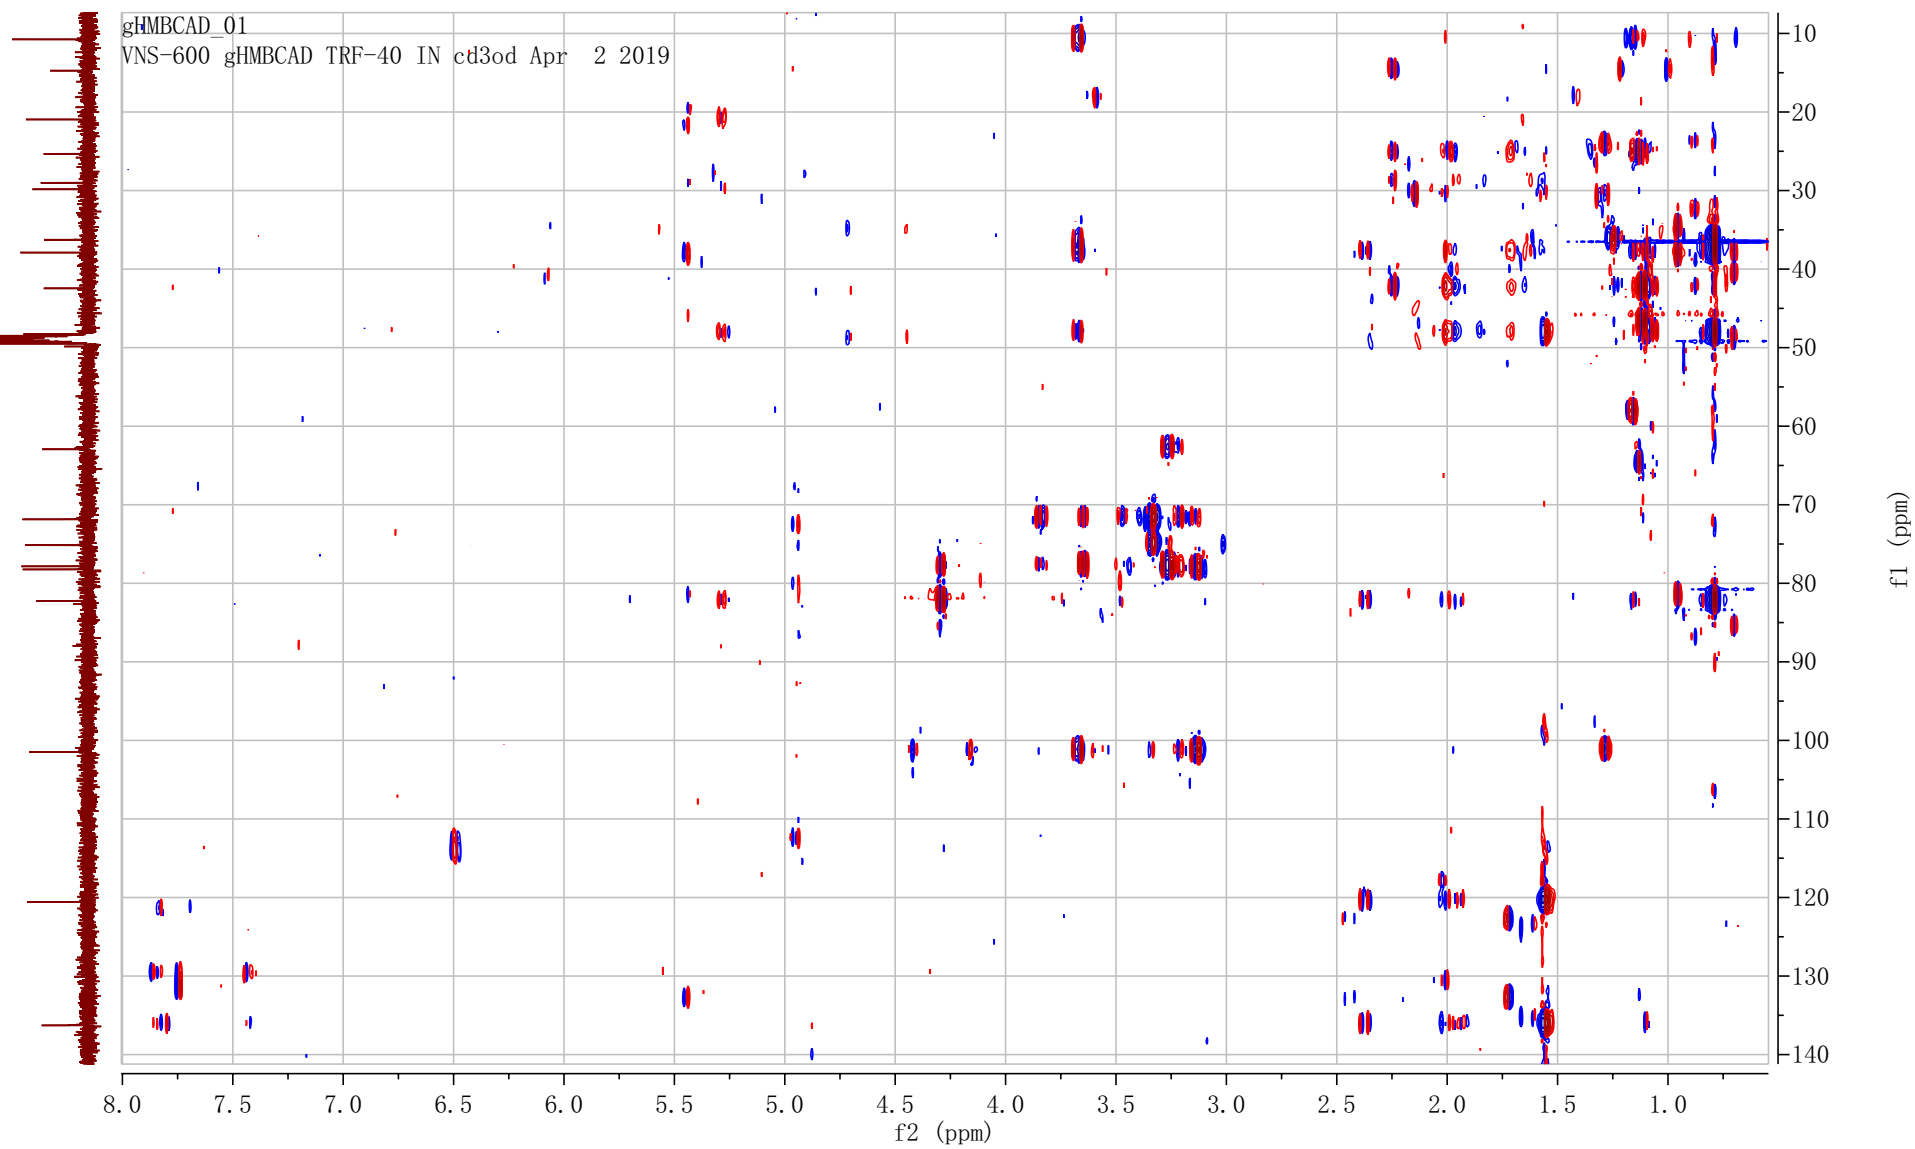

Supplement: s1 [file s1]

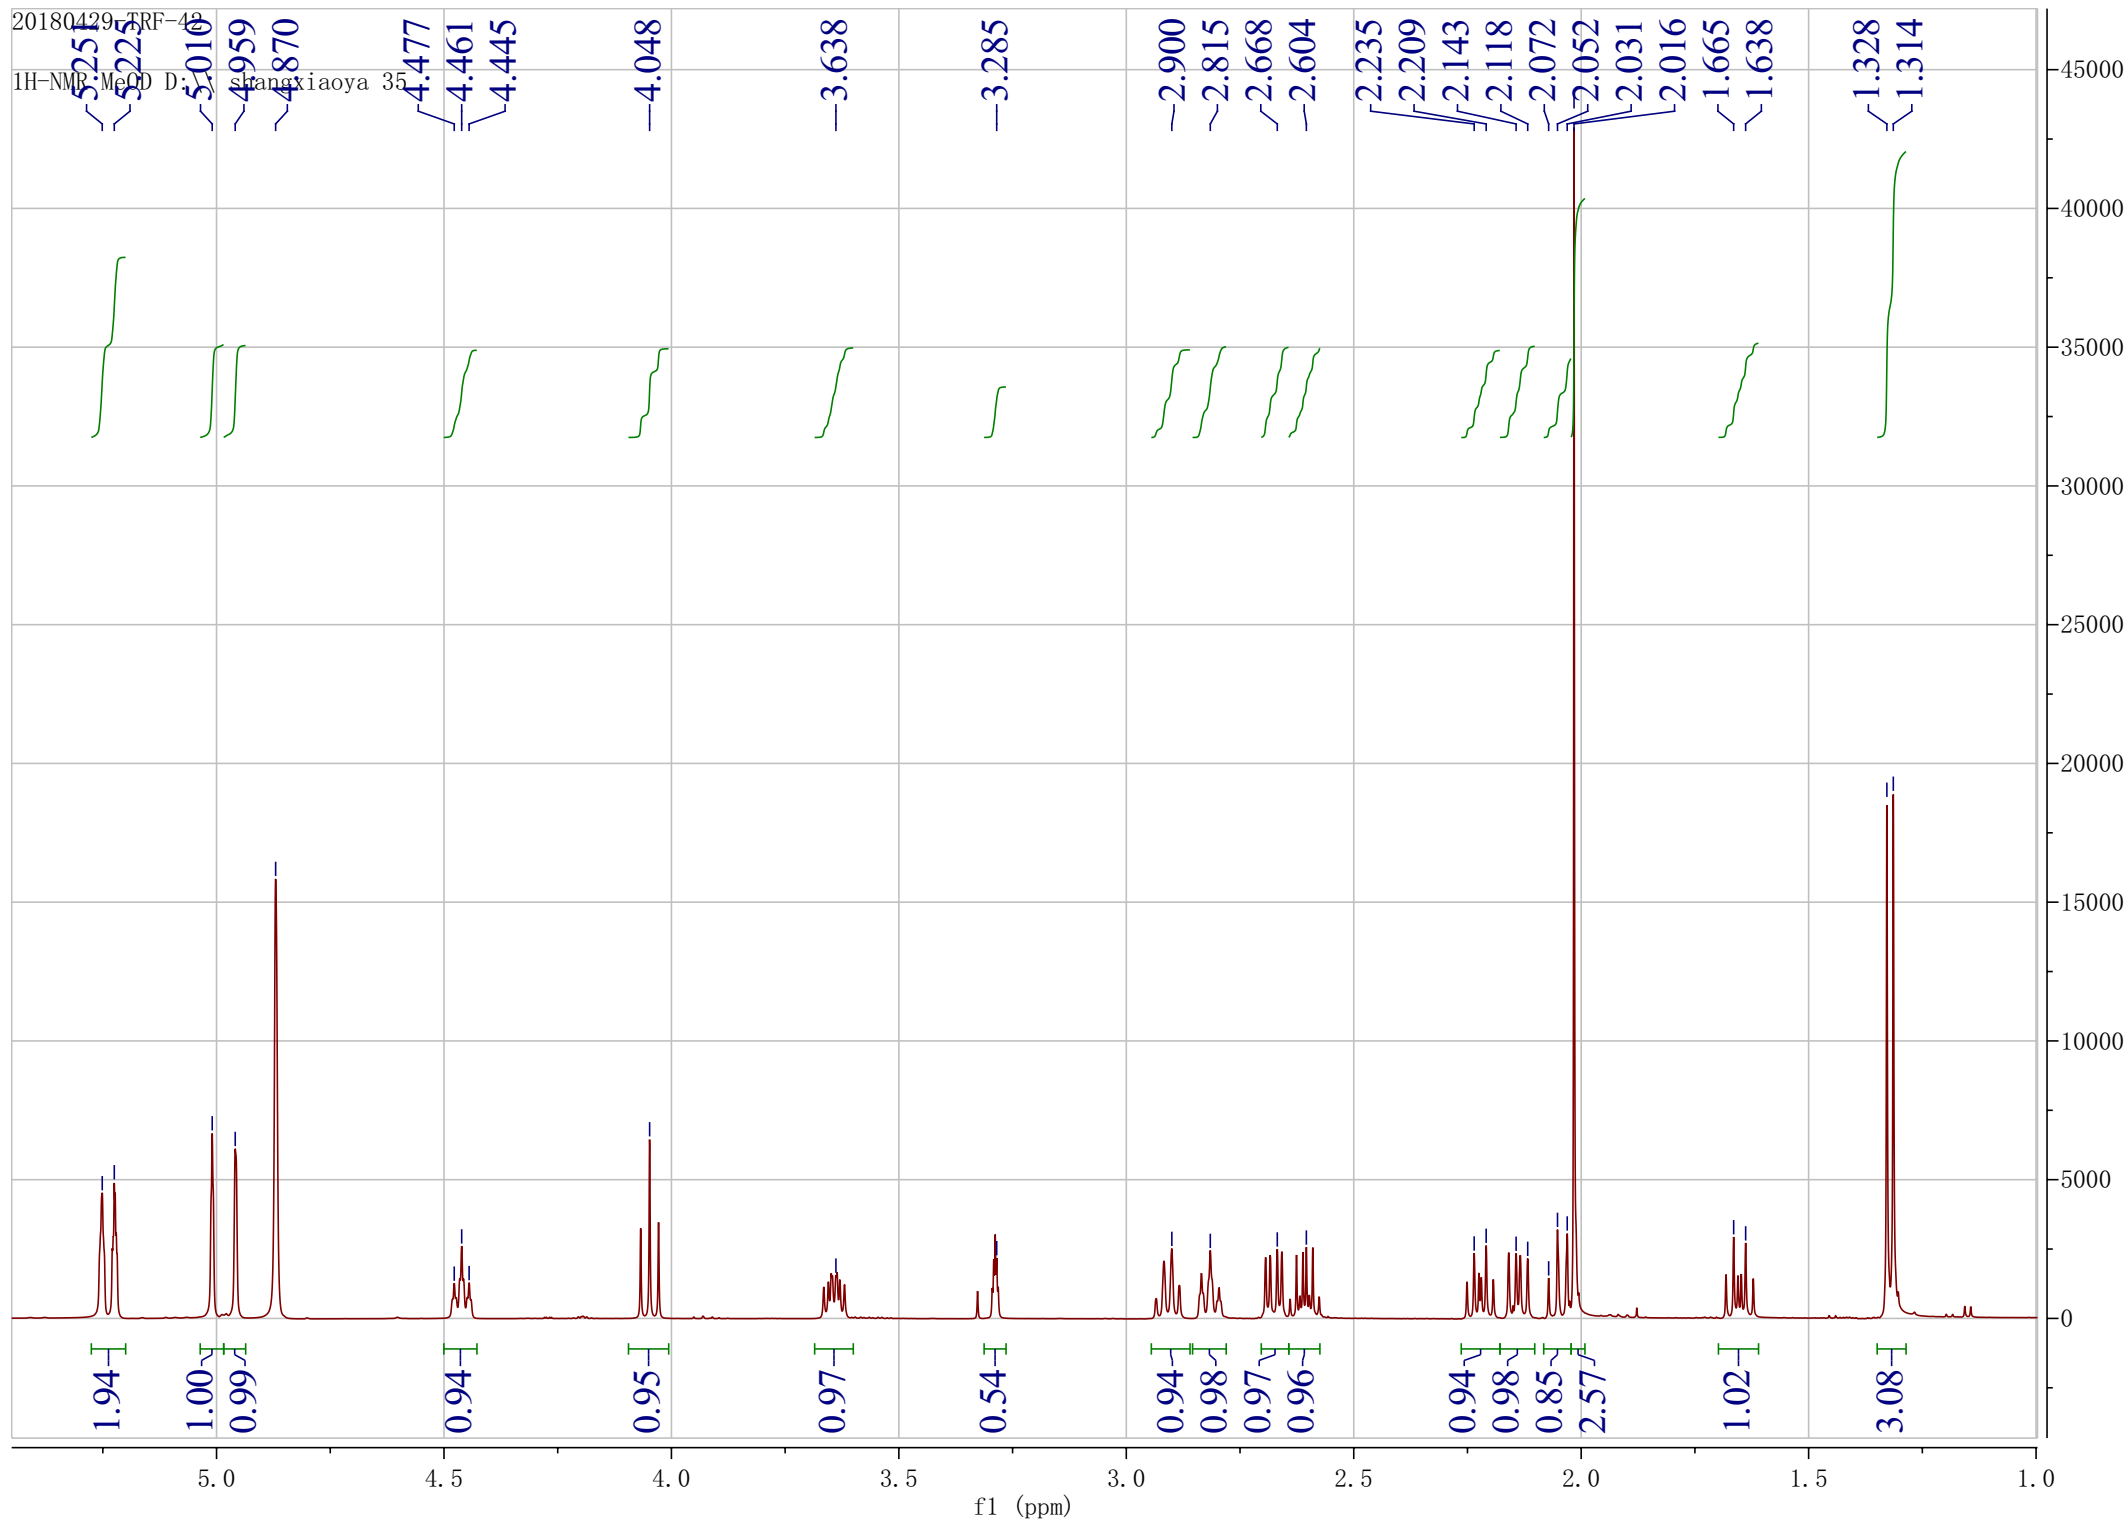

Supplement: s1 [file s1]

TRF-38\_Pos\_FullMs #317 RT: 1.61 AV: 1 NL: 1.02E9  
T: FTMS + p ESI Full ms [50.0000-750.0000]

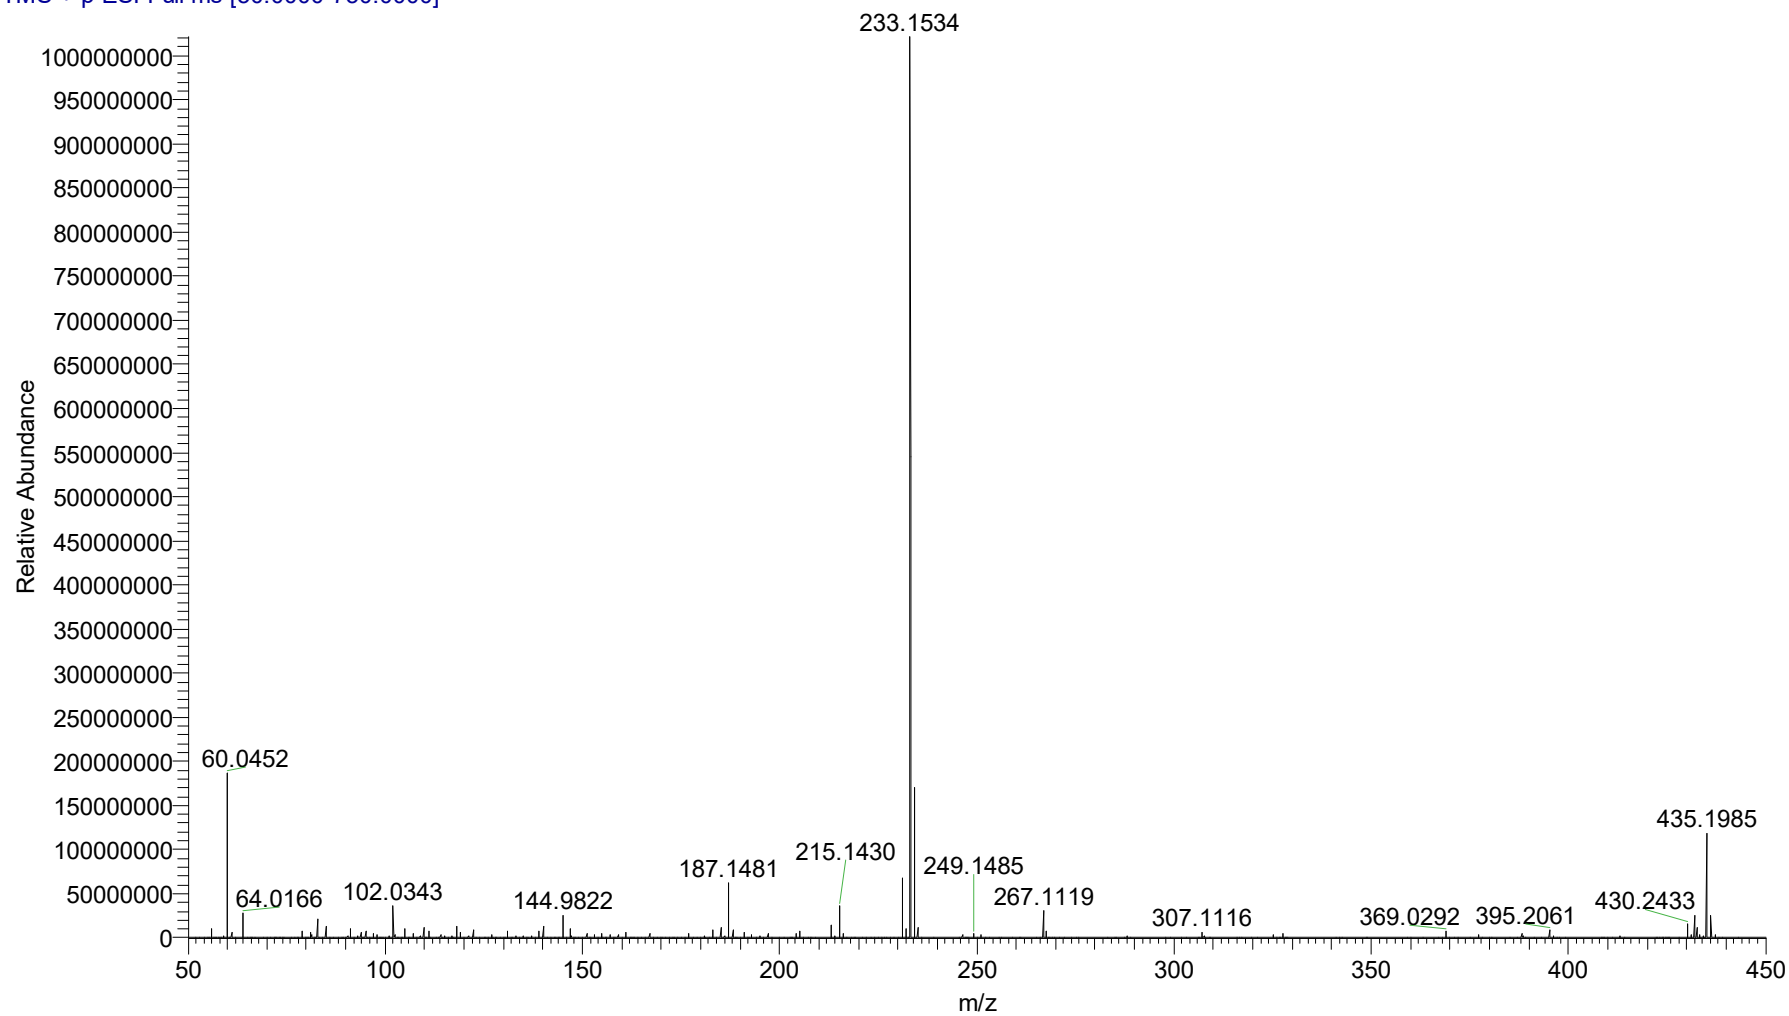

Supplement: s1 [file s1]

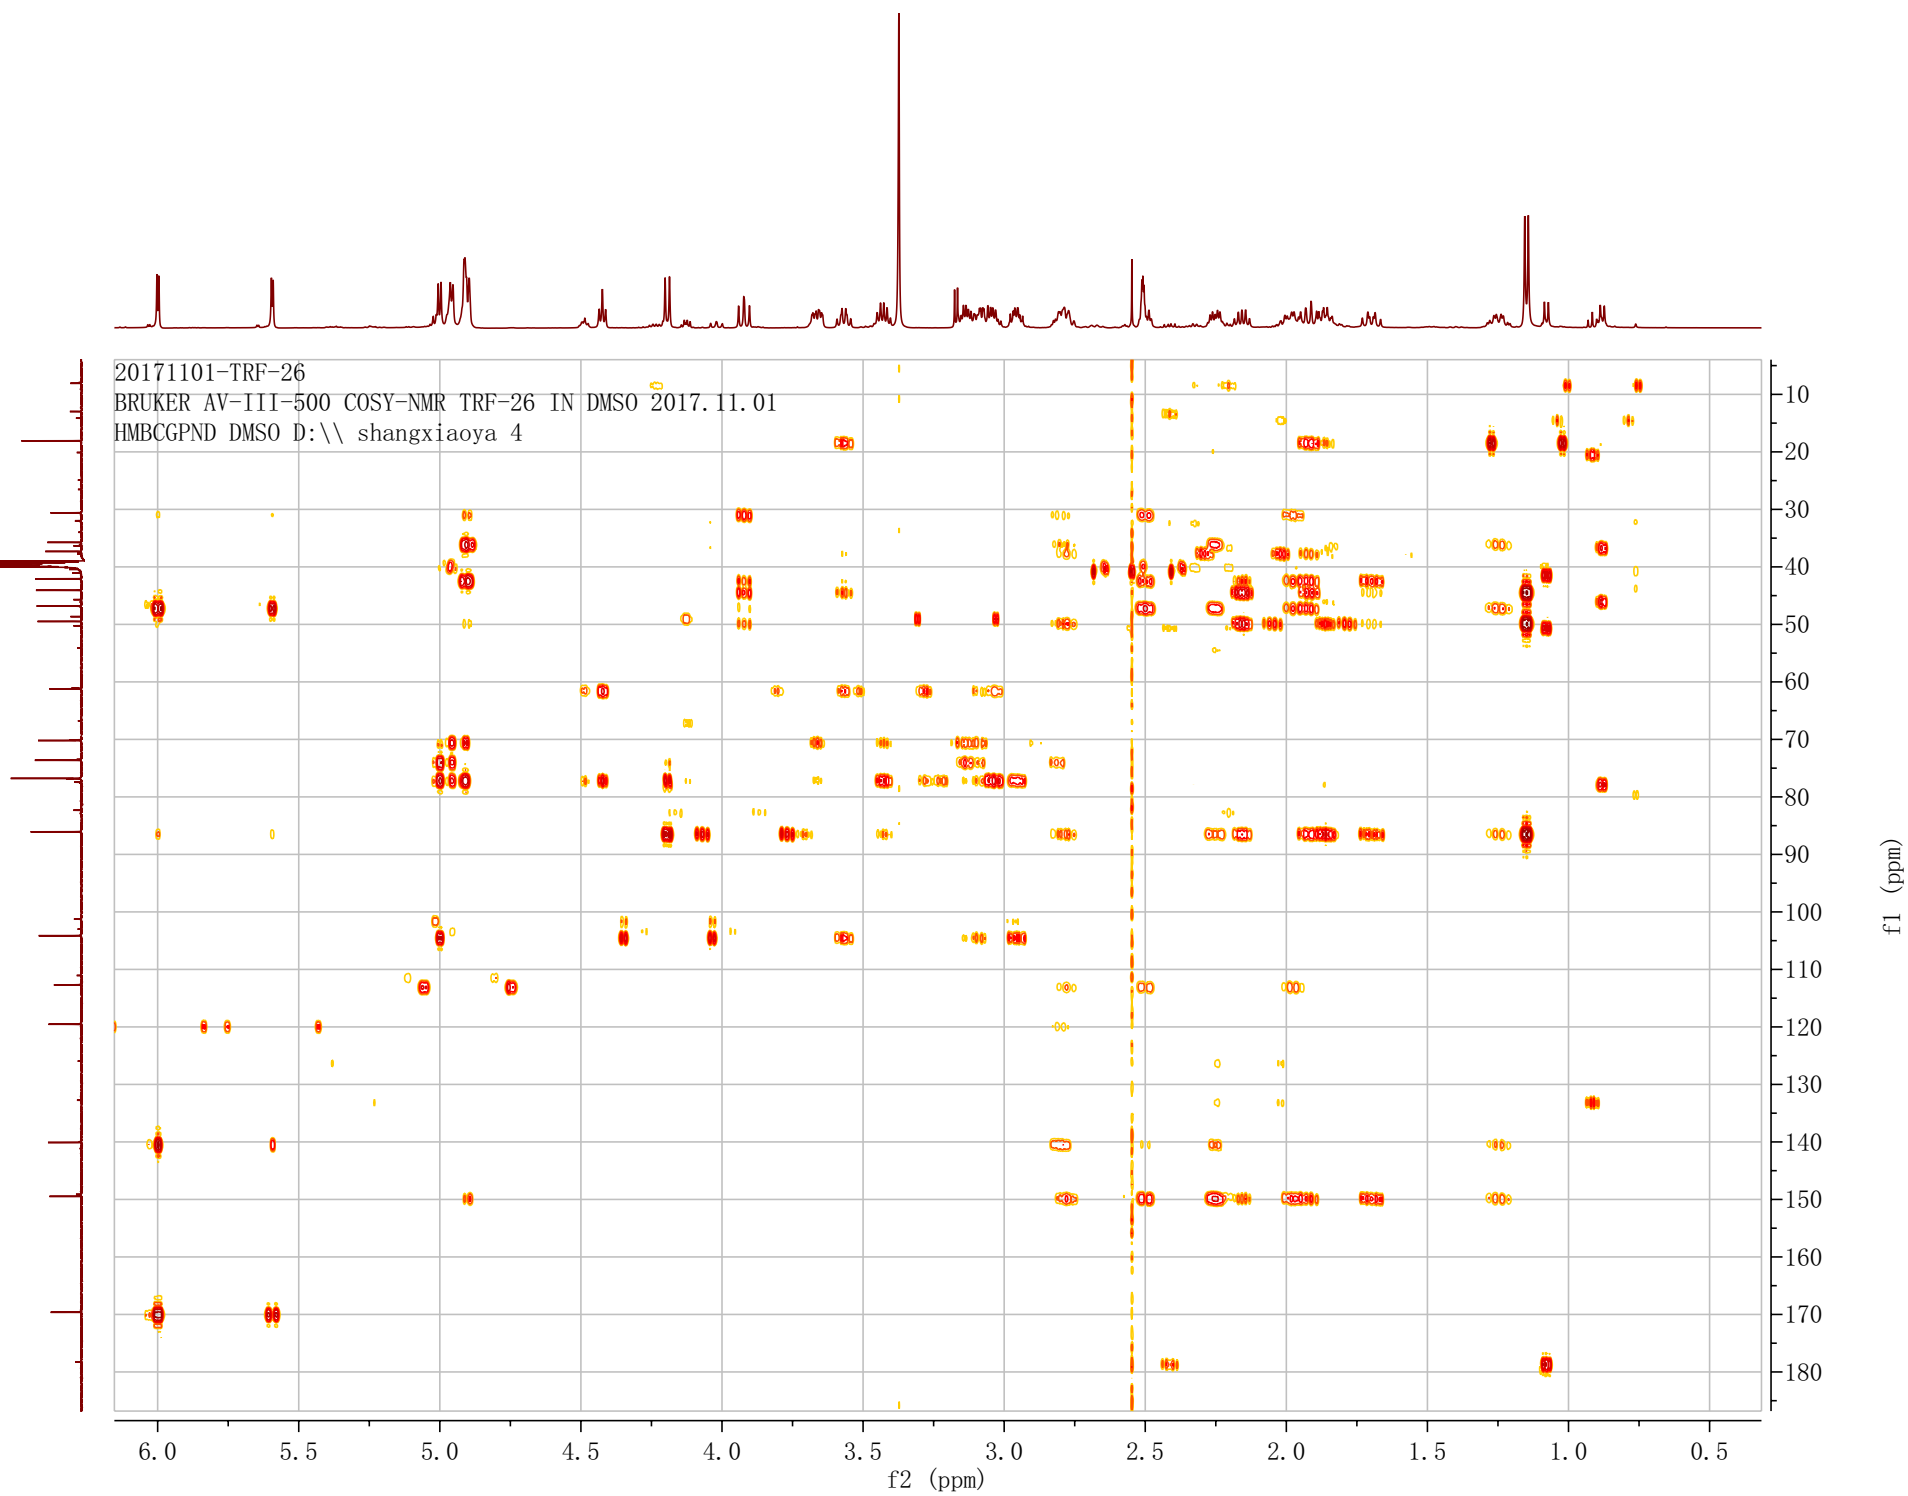

Supplement: s1 [file s1]

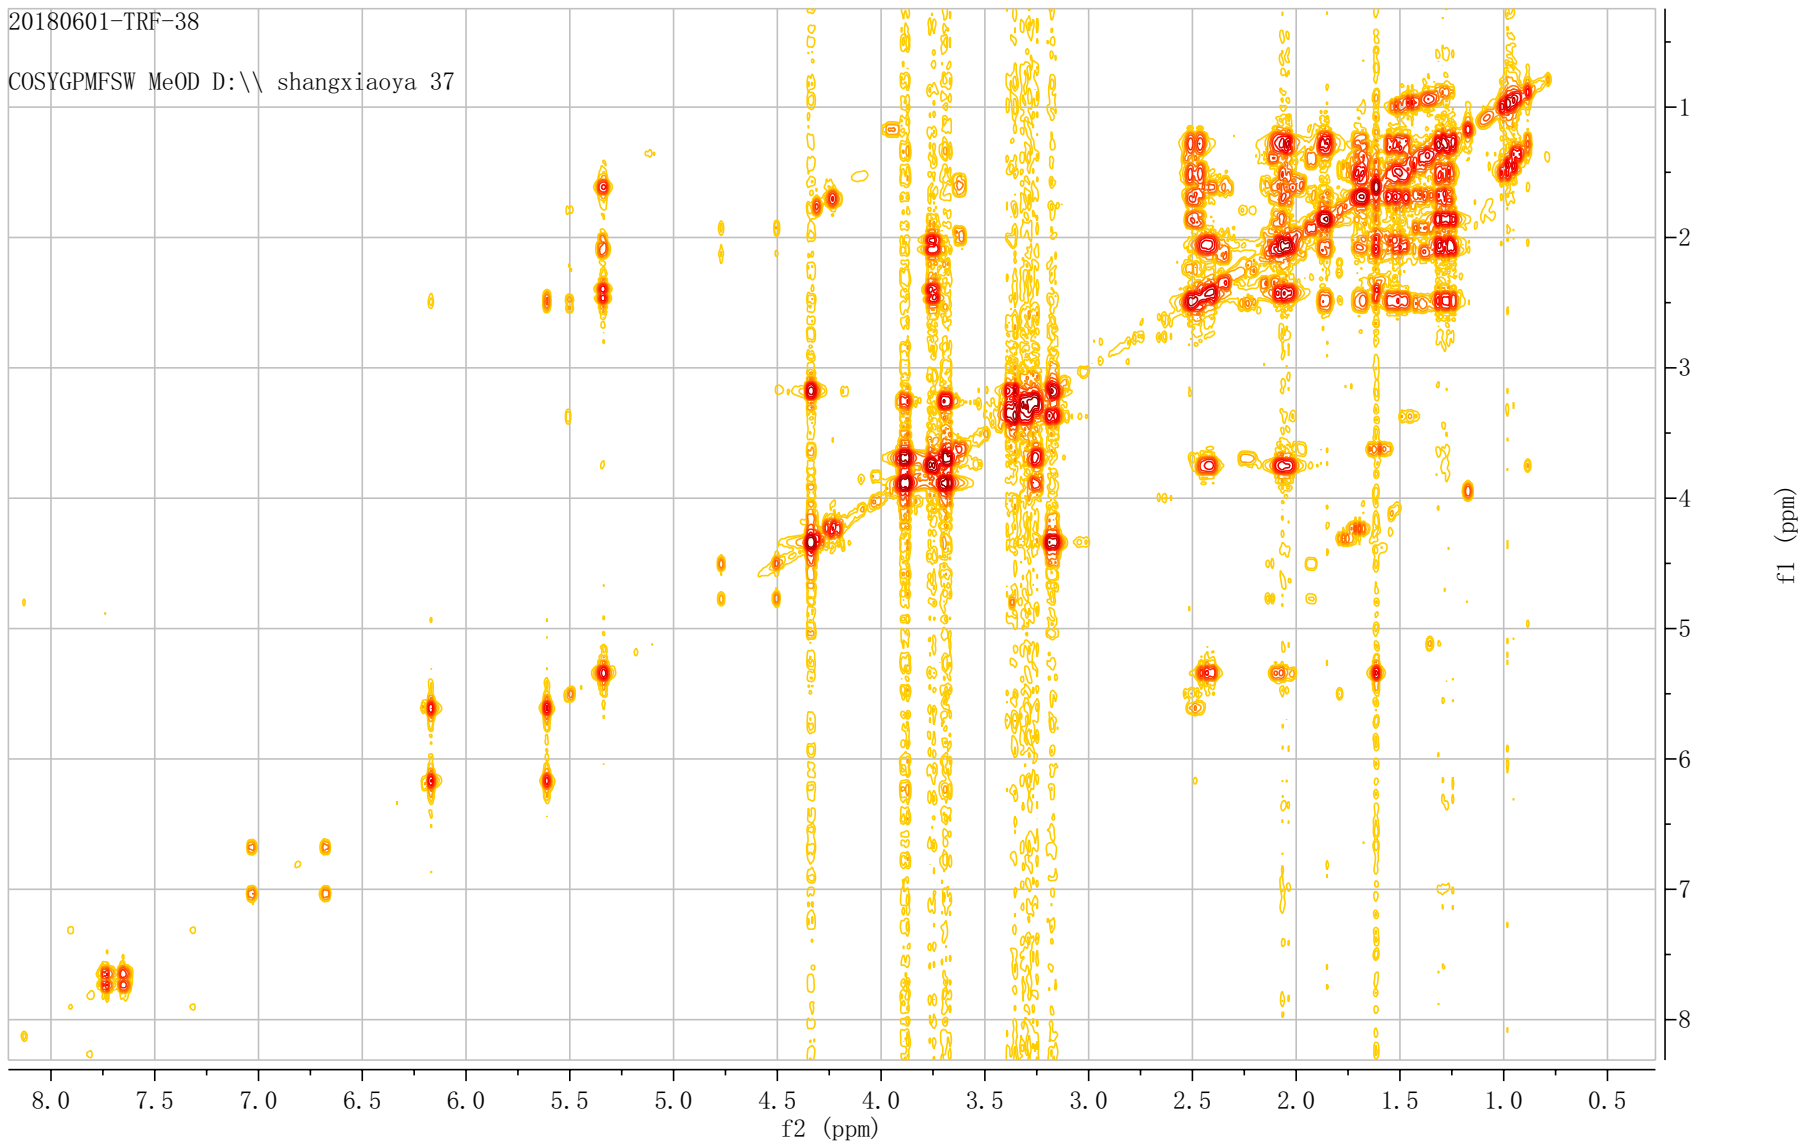

Supplement: s1 [file s1]

TRF-26\_Pos\_FullMs #831 RT: 4.21 AV: 1 NL: 4.71E8  
T: FTMS + p ESI Full ms [50.0000-500.0000]

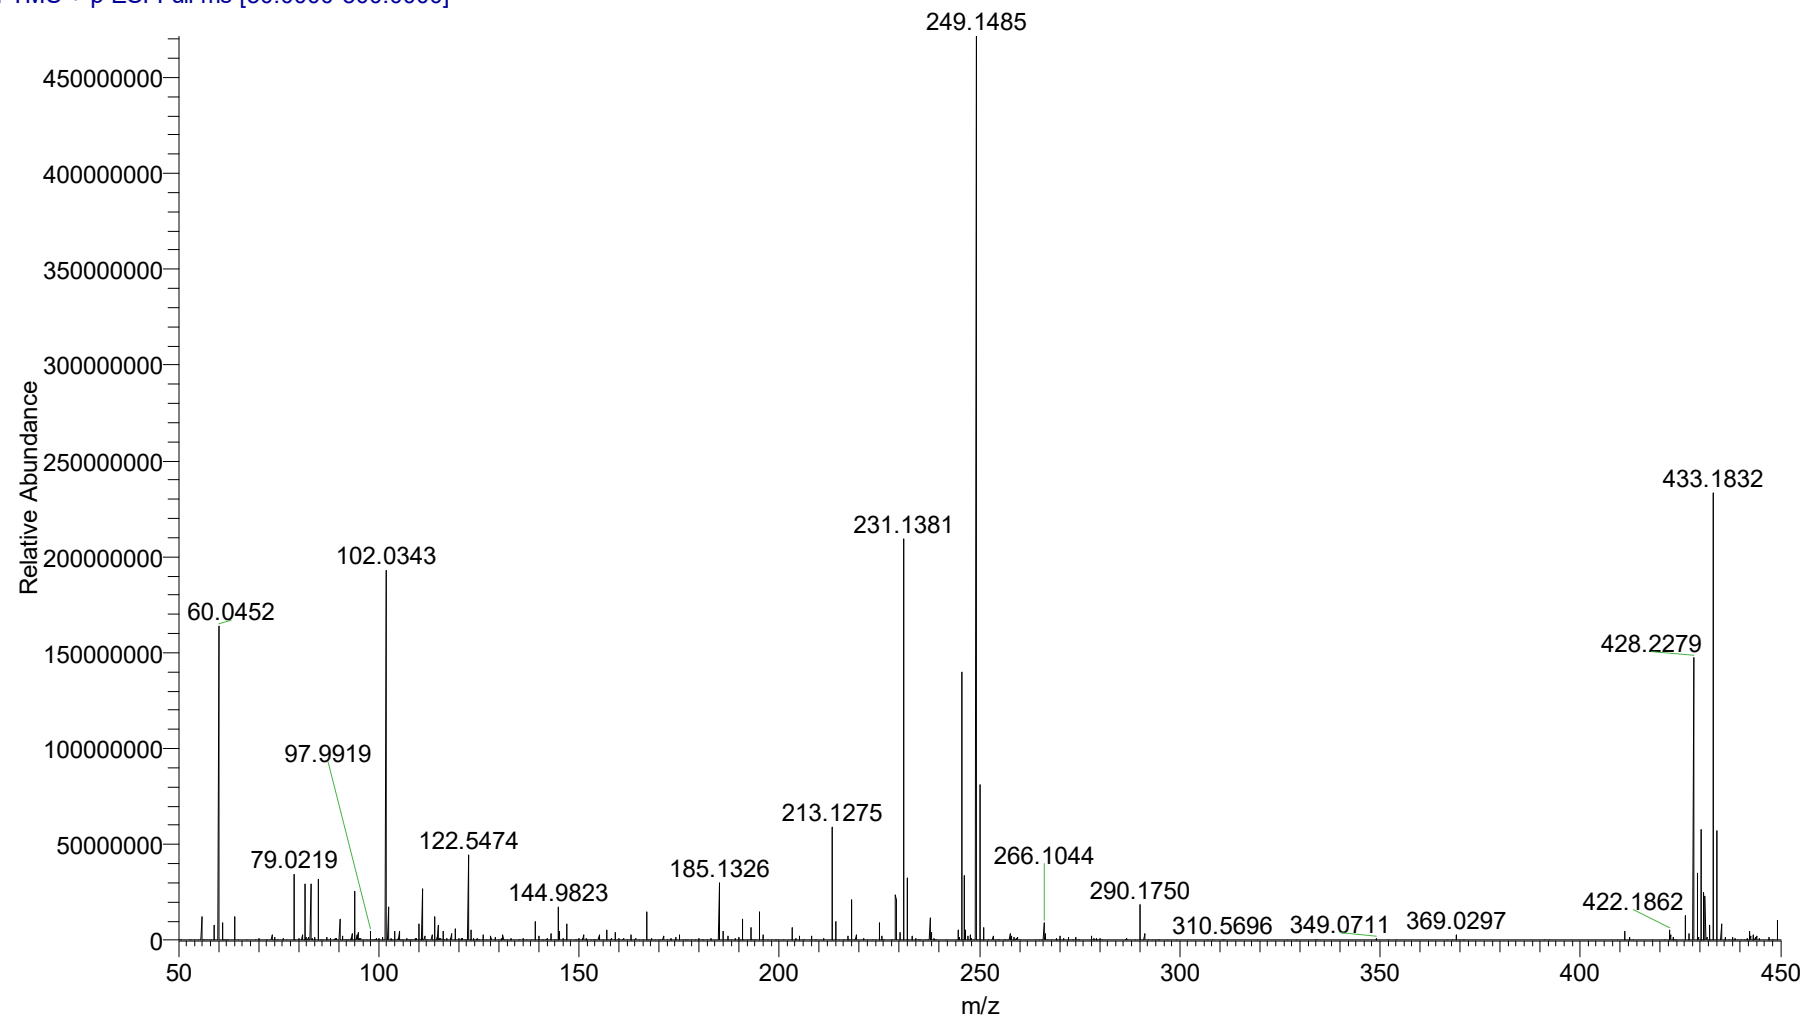

Supplement: s1 [file s1]

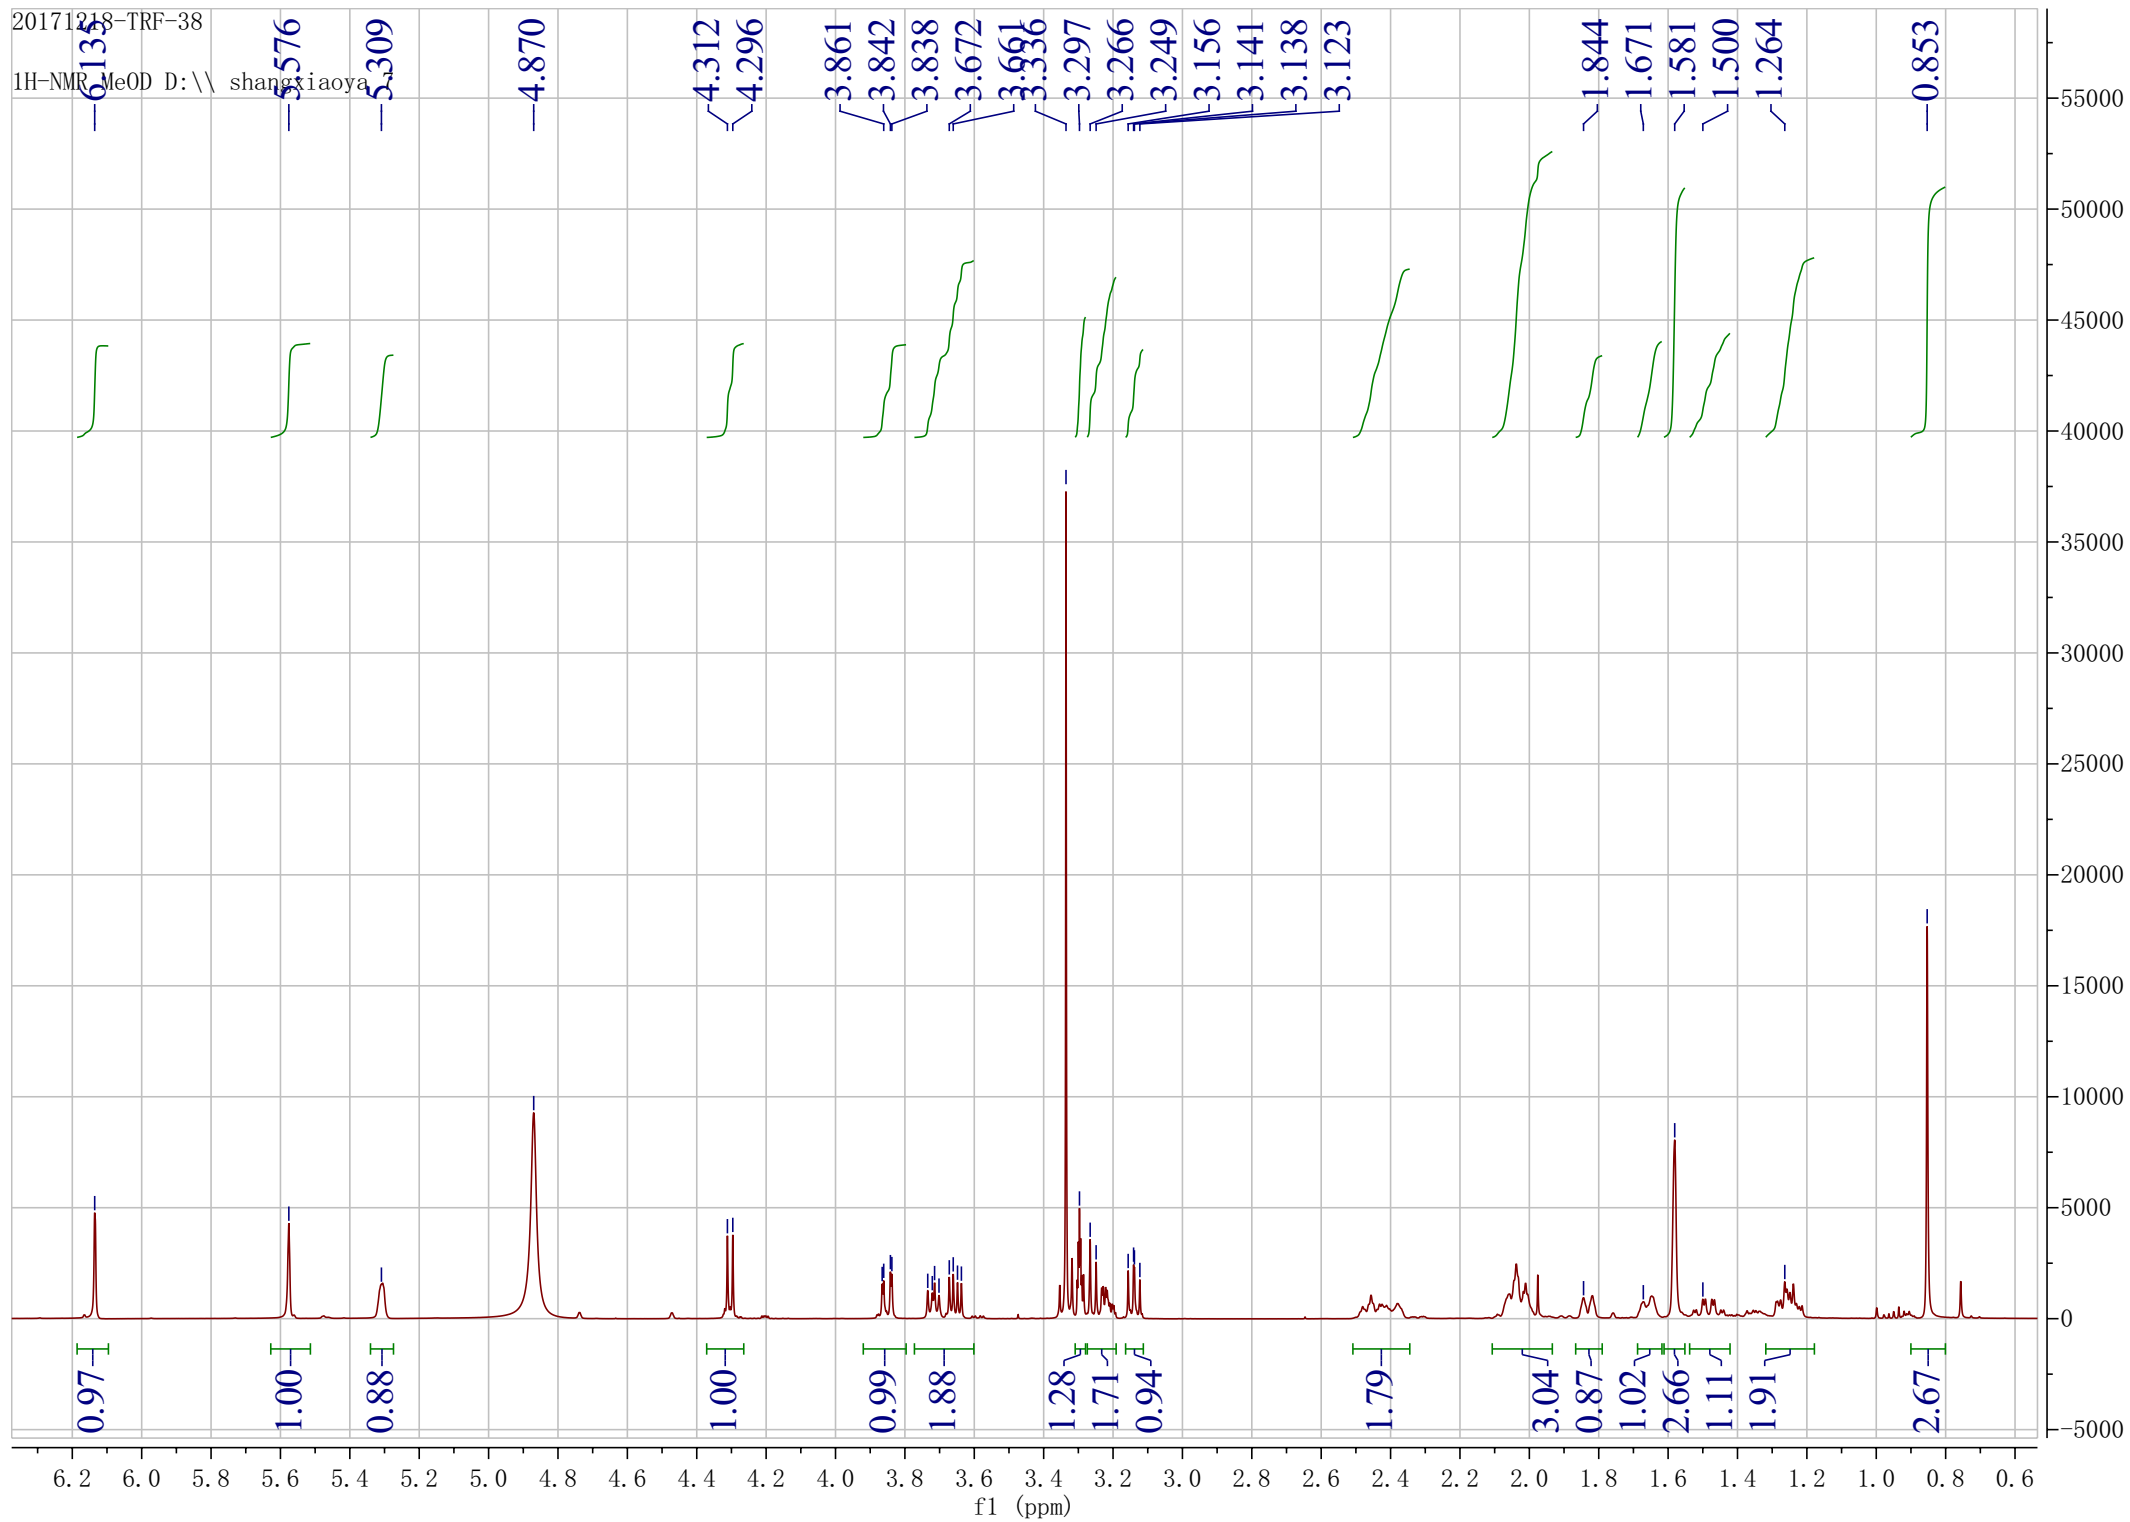

Supplement: s1 [file s1]

20170908-TRF-27  
BRUKER AV-III-500 13C-NMR TRF-27 IN DMSO 2017.09.08  
13C-NMR DMSO D:\\shangxiaoya\\19

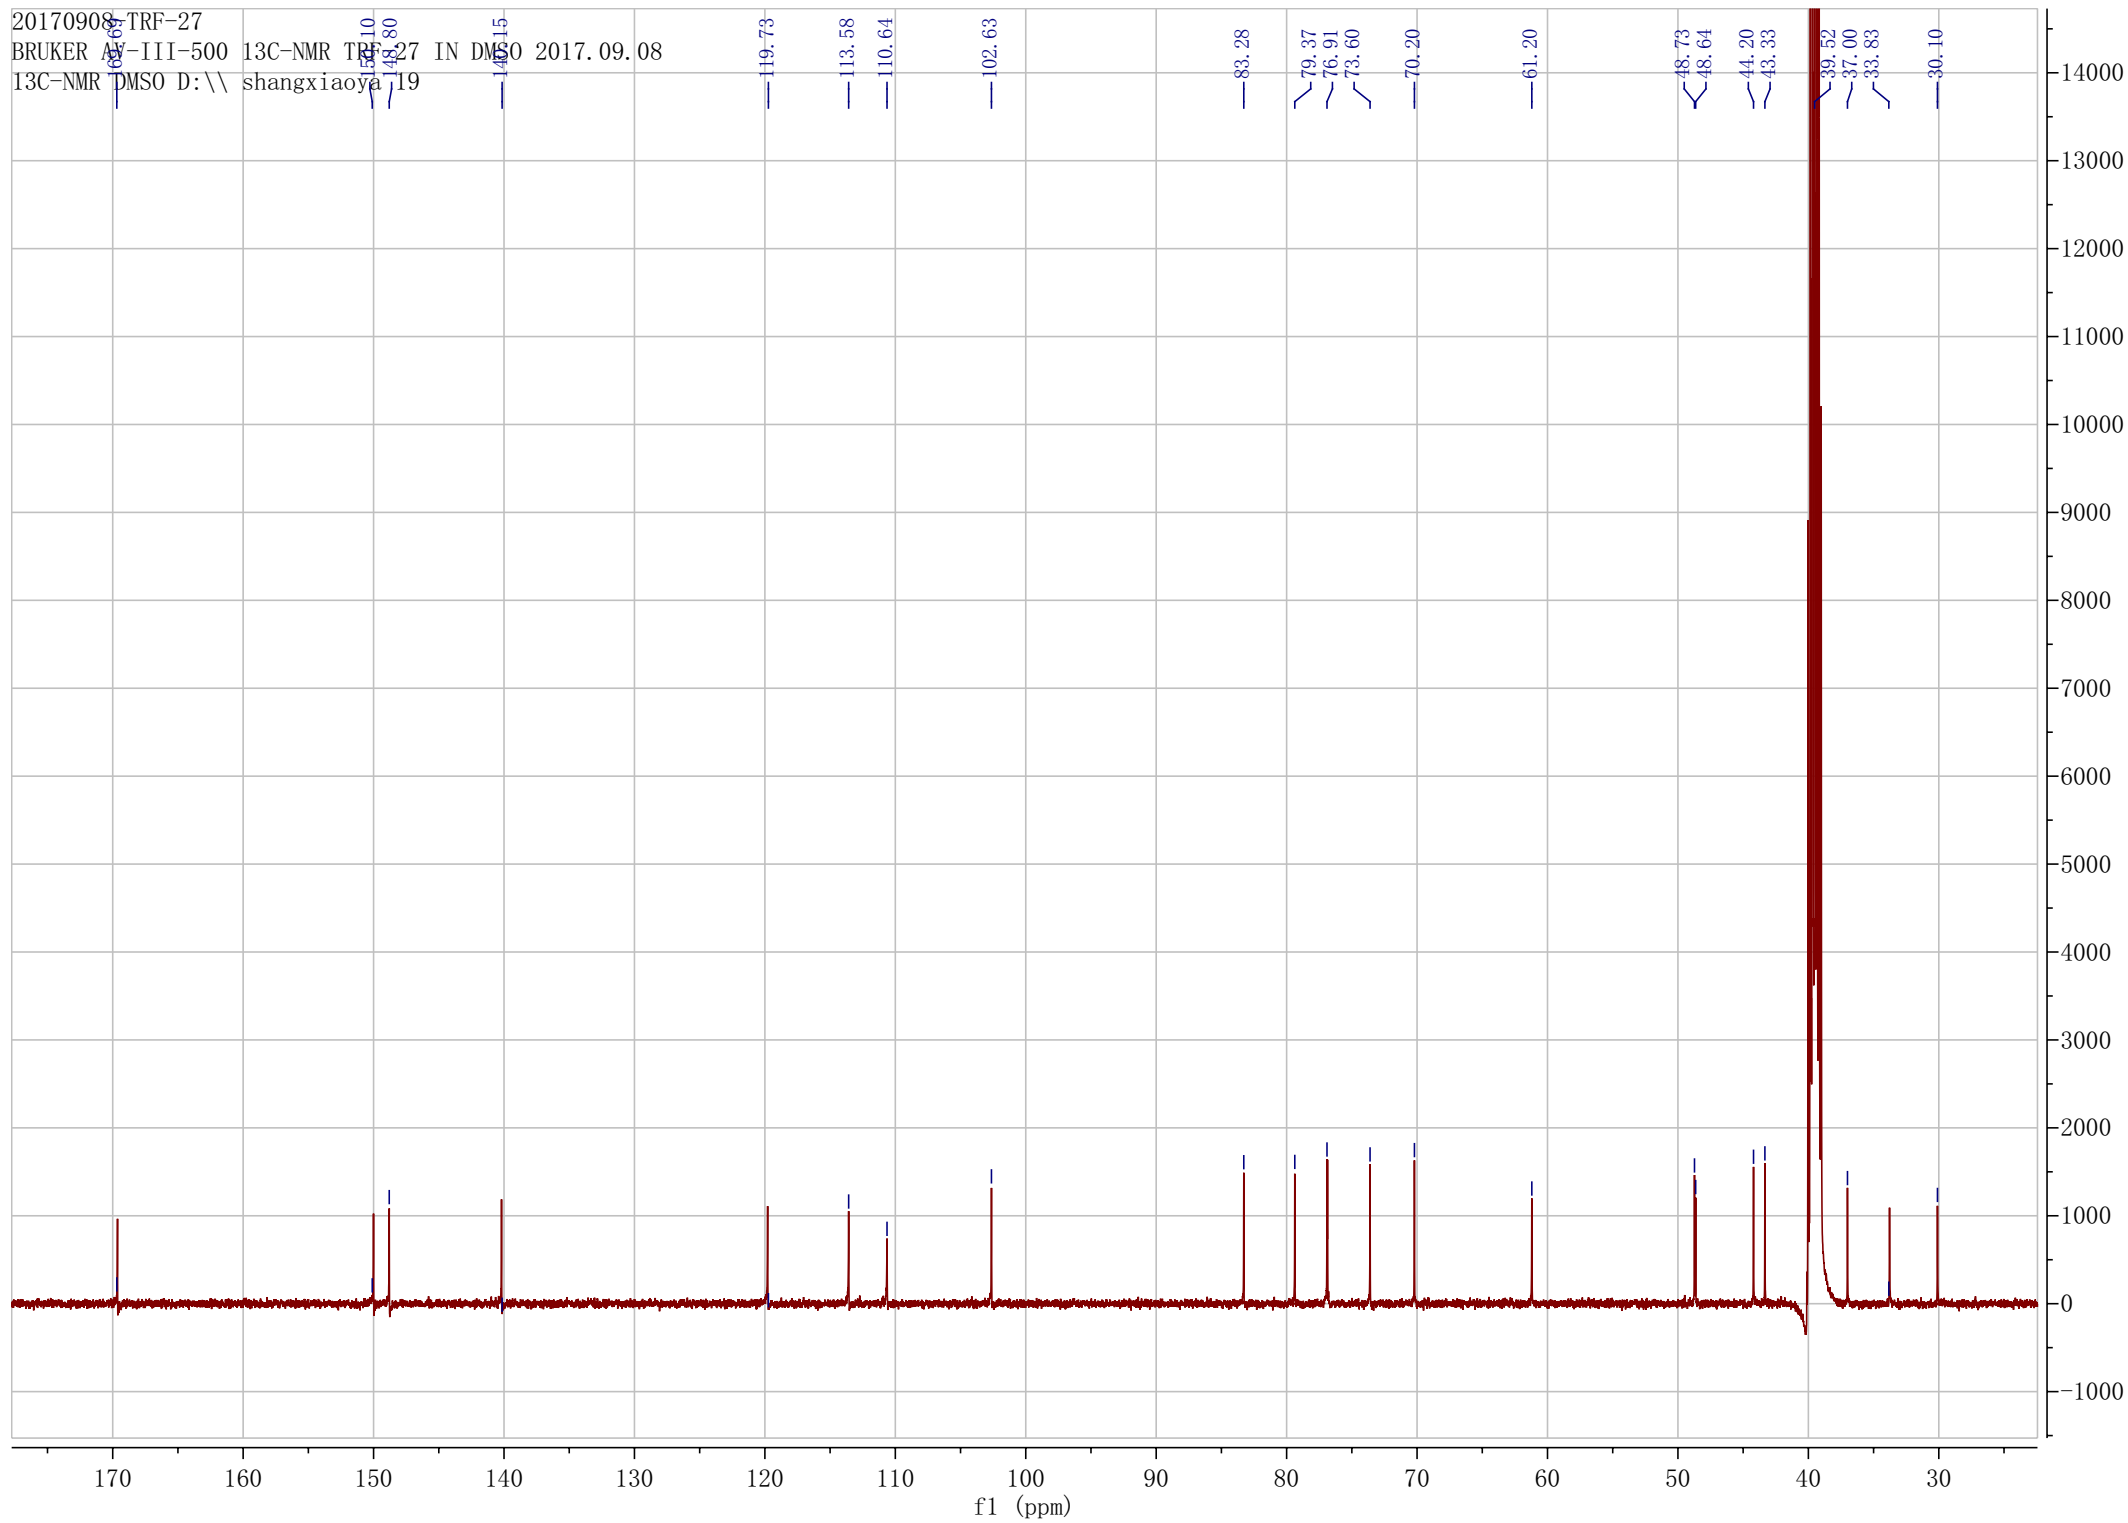

Supplement: s1 [file s1]

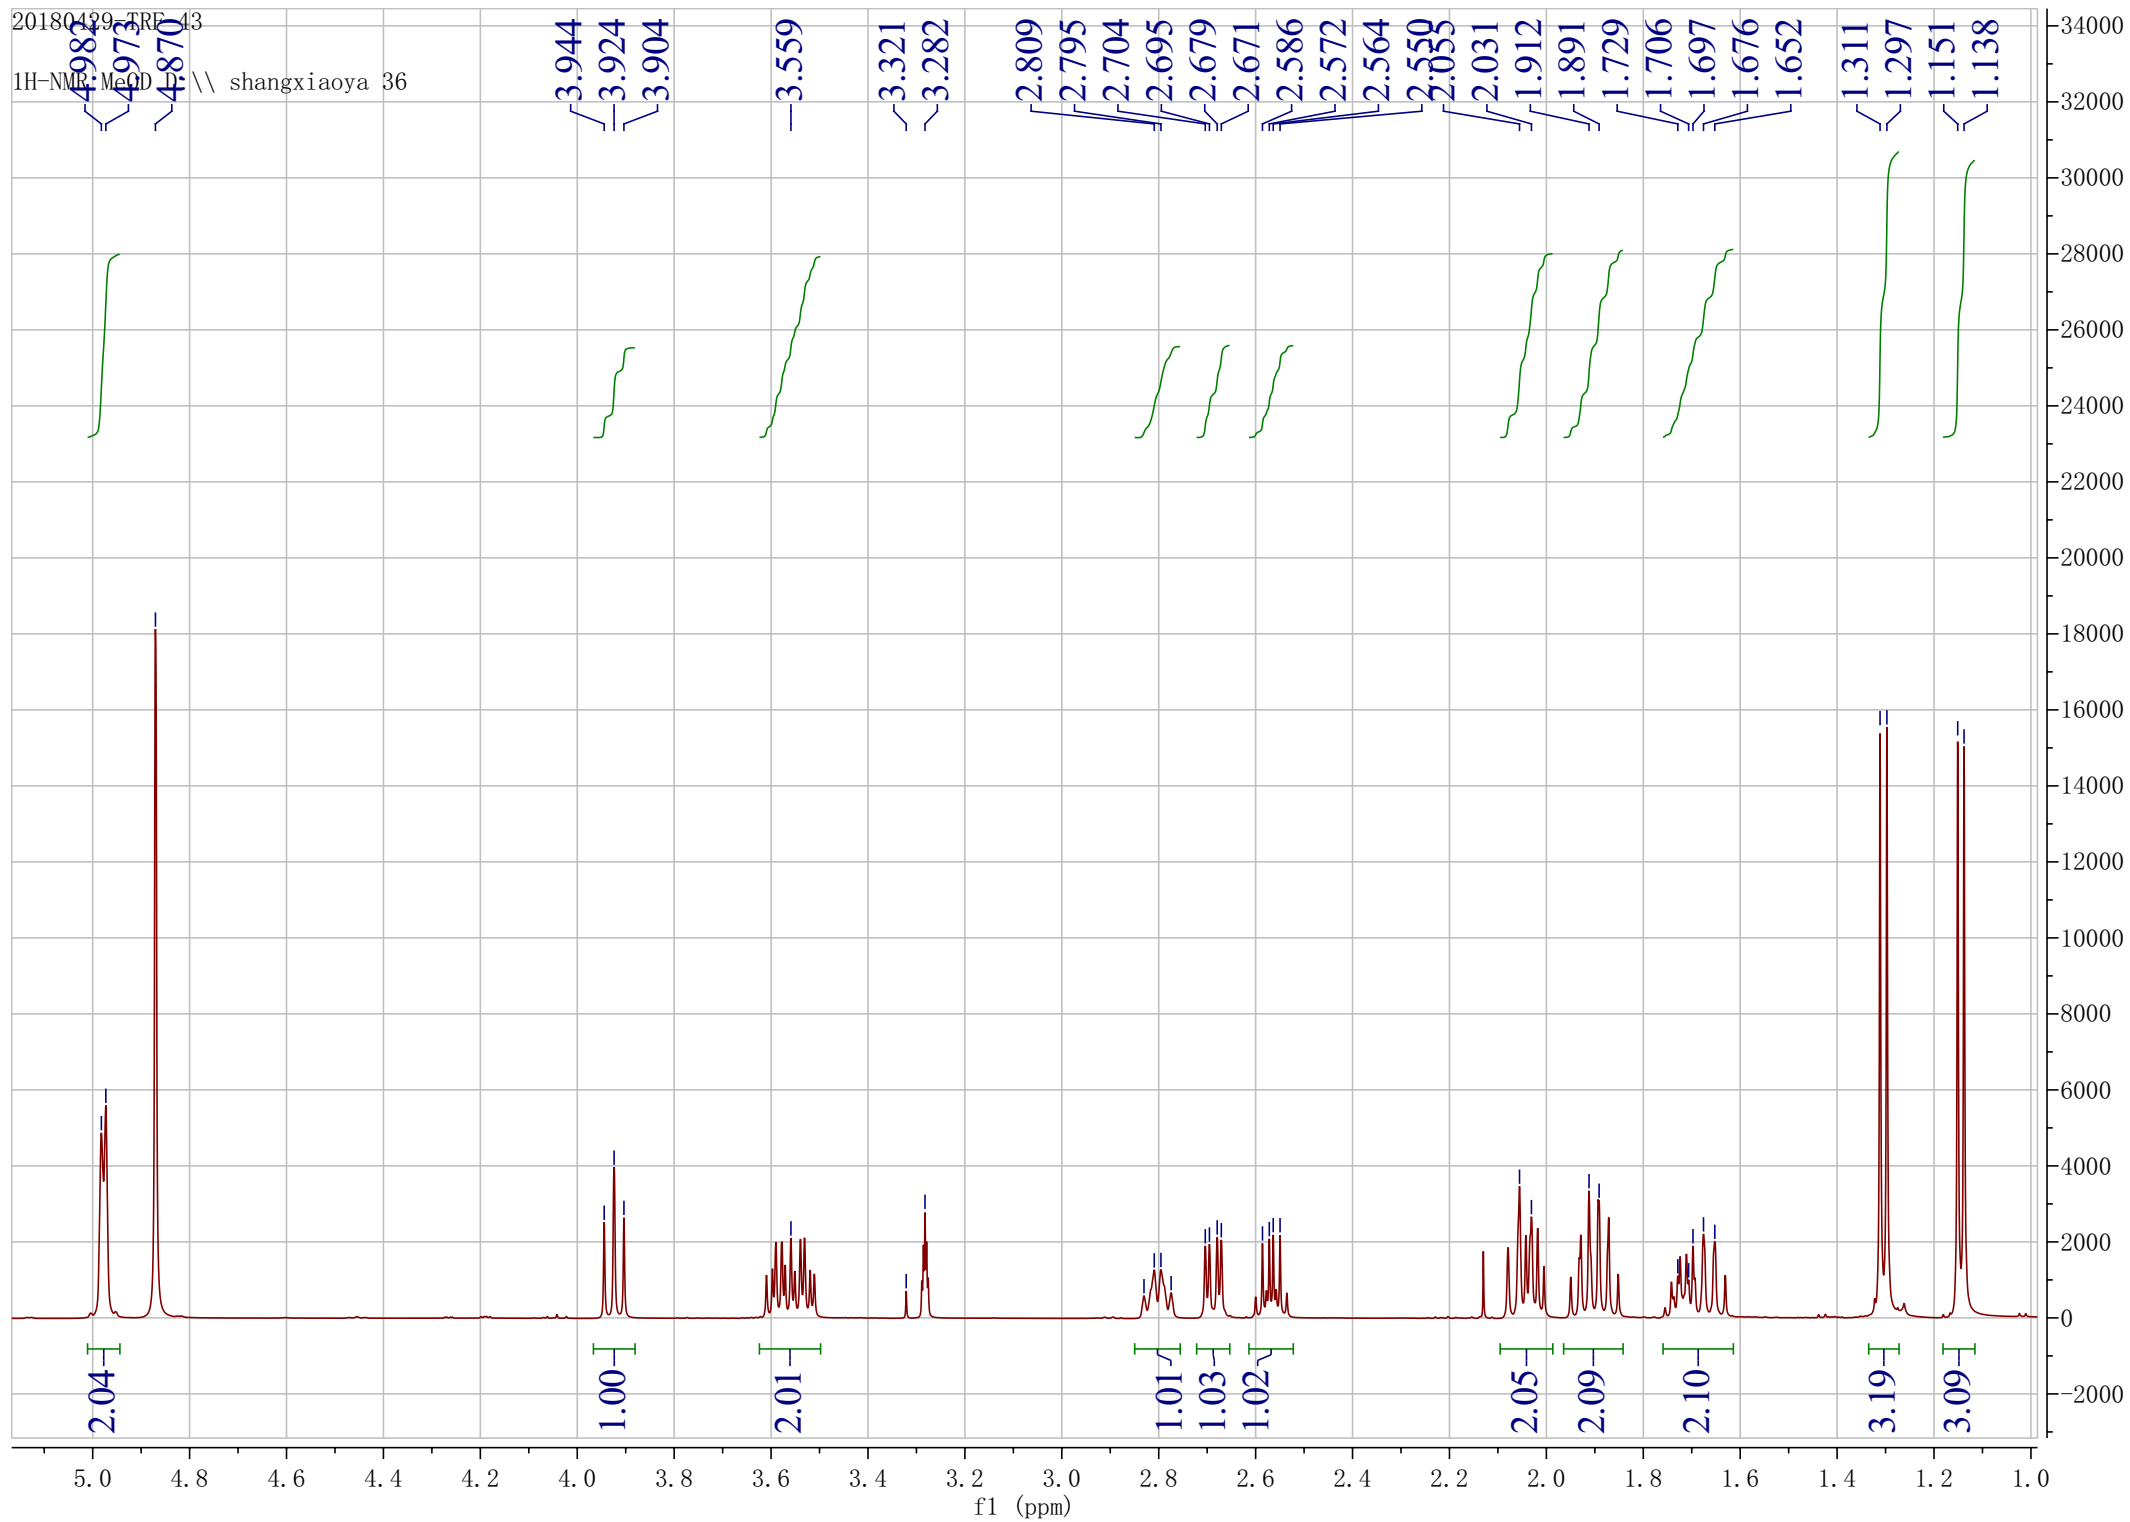

Supplement: s1 [file s1]

20170908+TRF-29  
BRUKER AV-III-500 1H-NMR TRF-29 IN MeOD 2017.09.08  
1H-NMR MeOD D:\\\\shangxiaoya 21

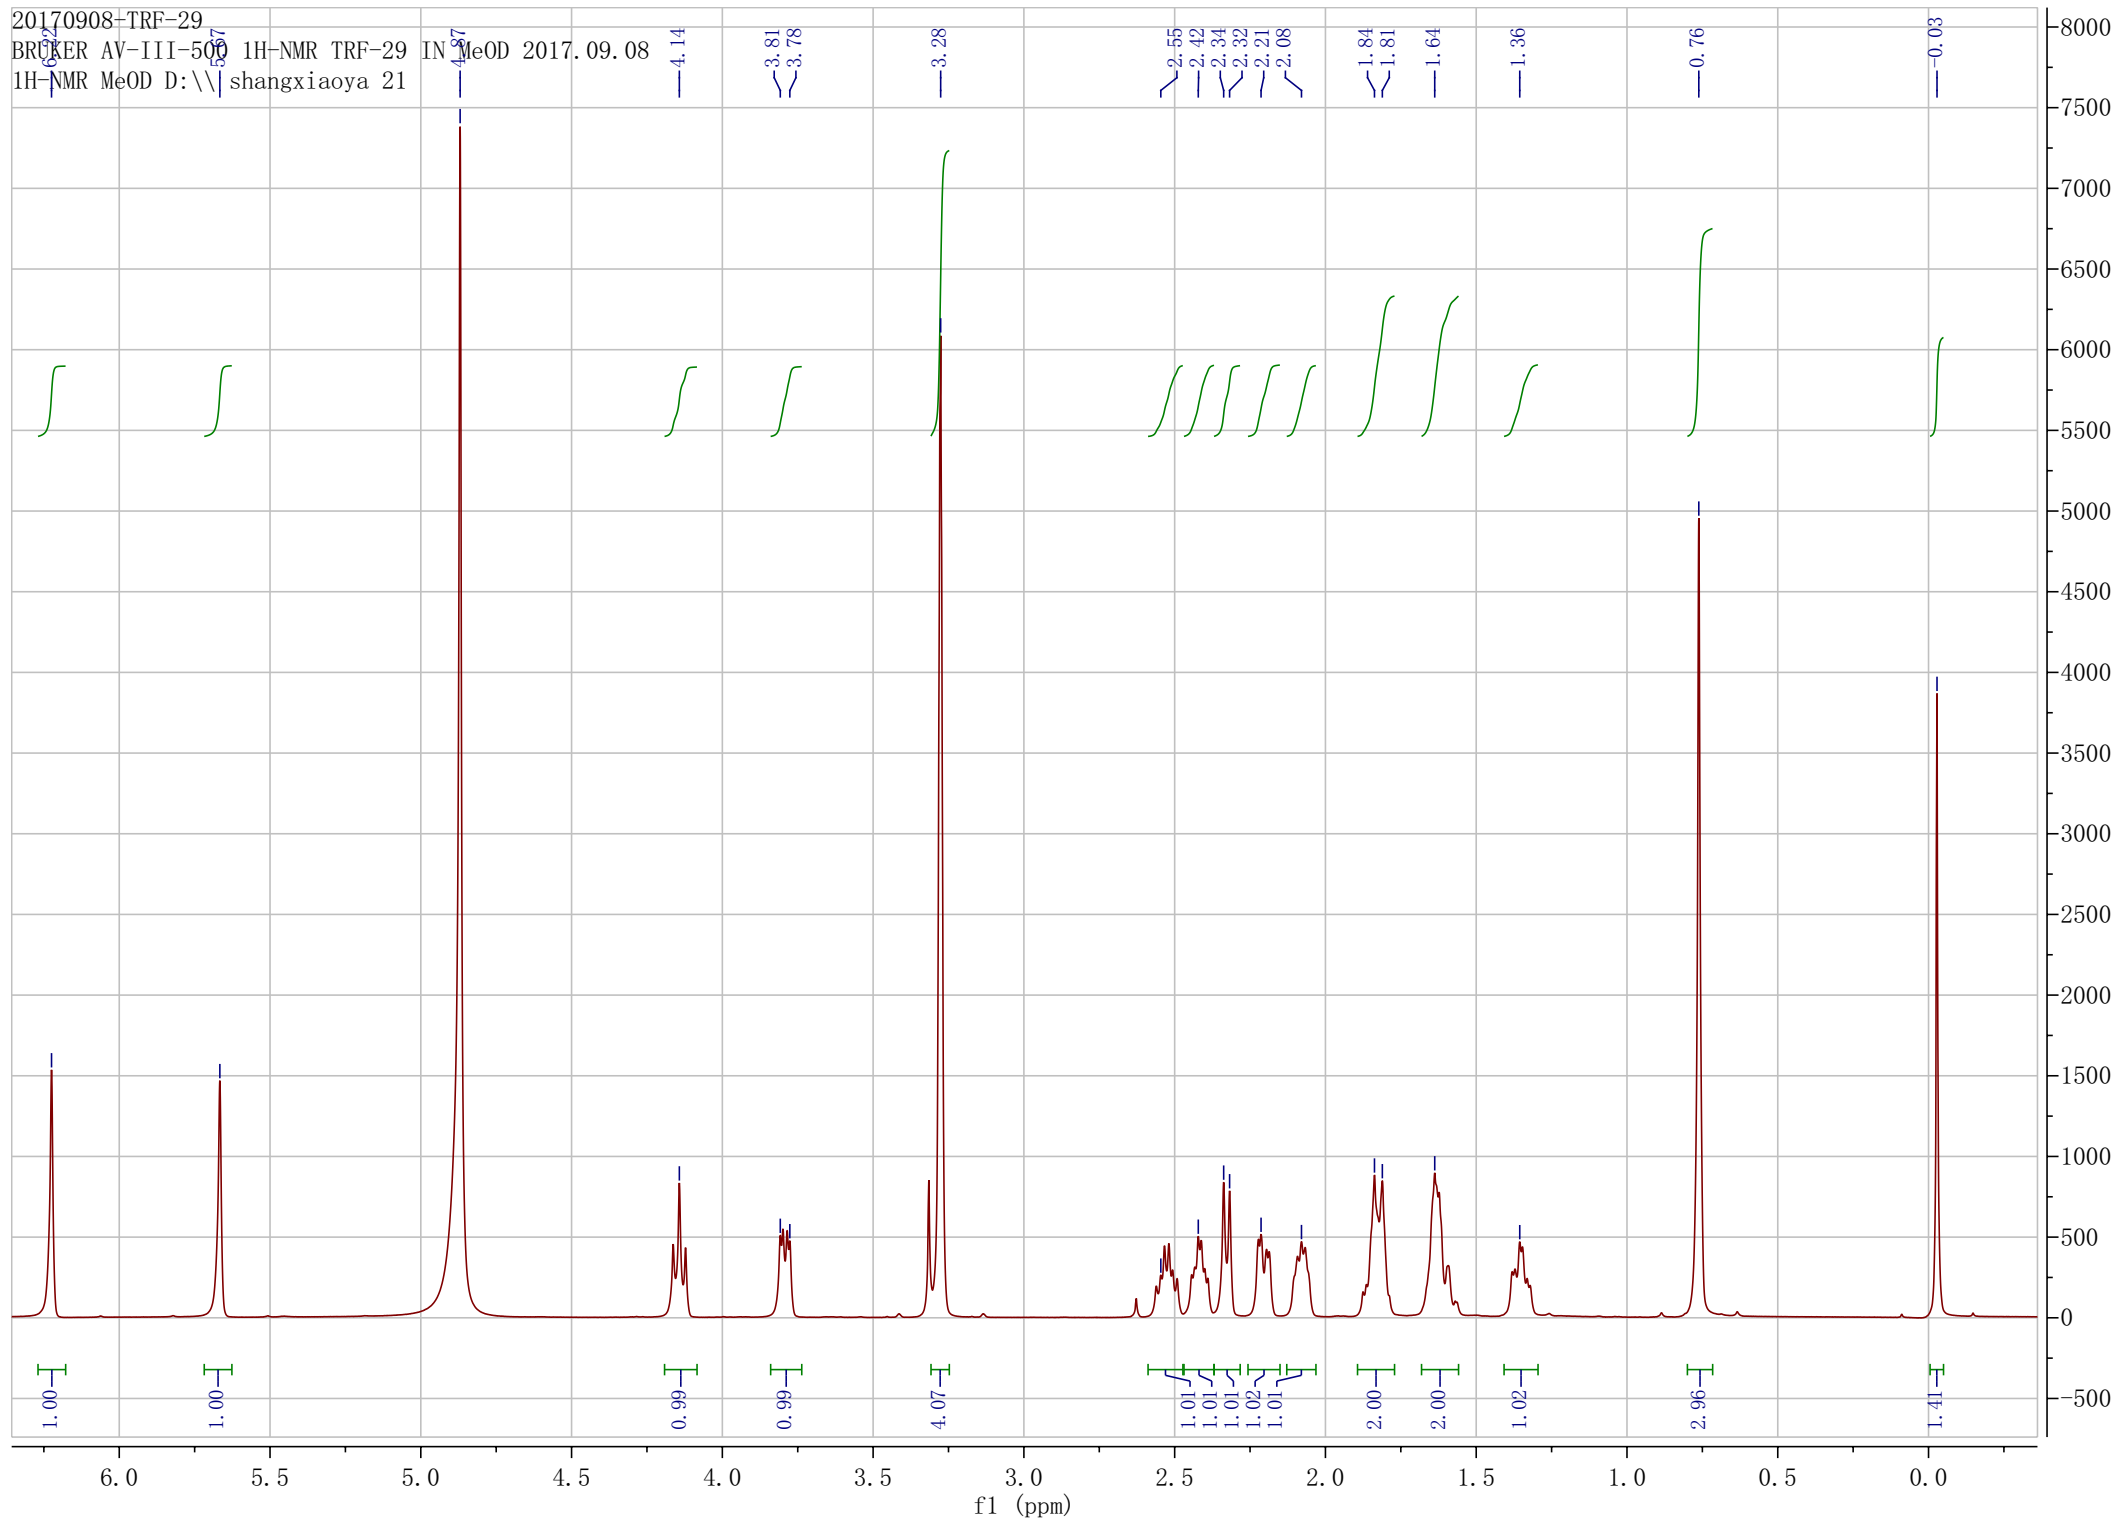

Supplement: s1 [file s1]

20170908-TRF-27  
BRUKER AV-III-500 1H-NMR TRF-27 IN DMSO-2017.09.08  
1H-NMR DMSO D:\shangxiaoya 19

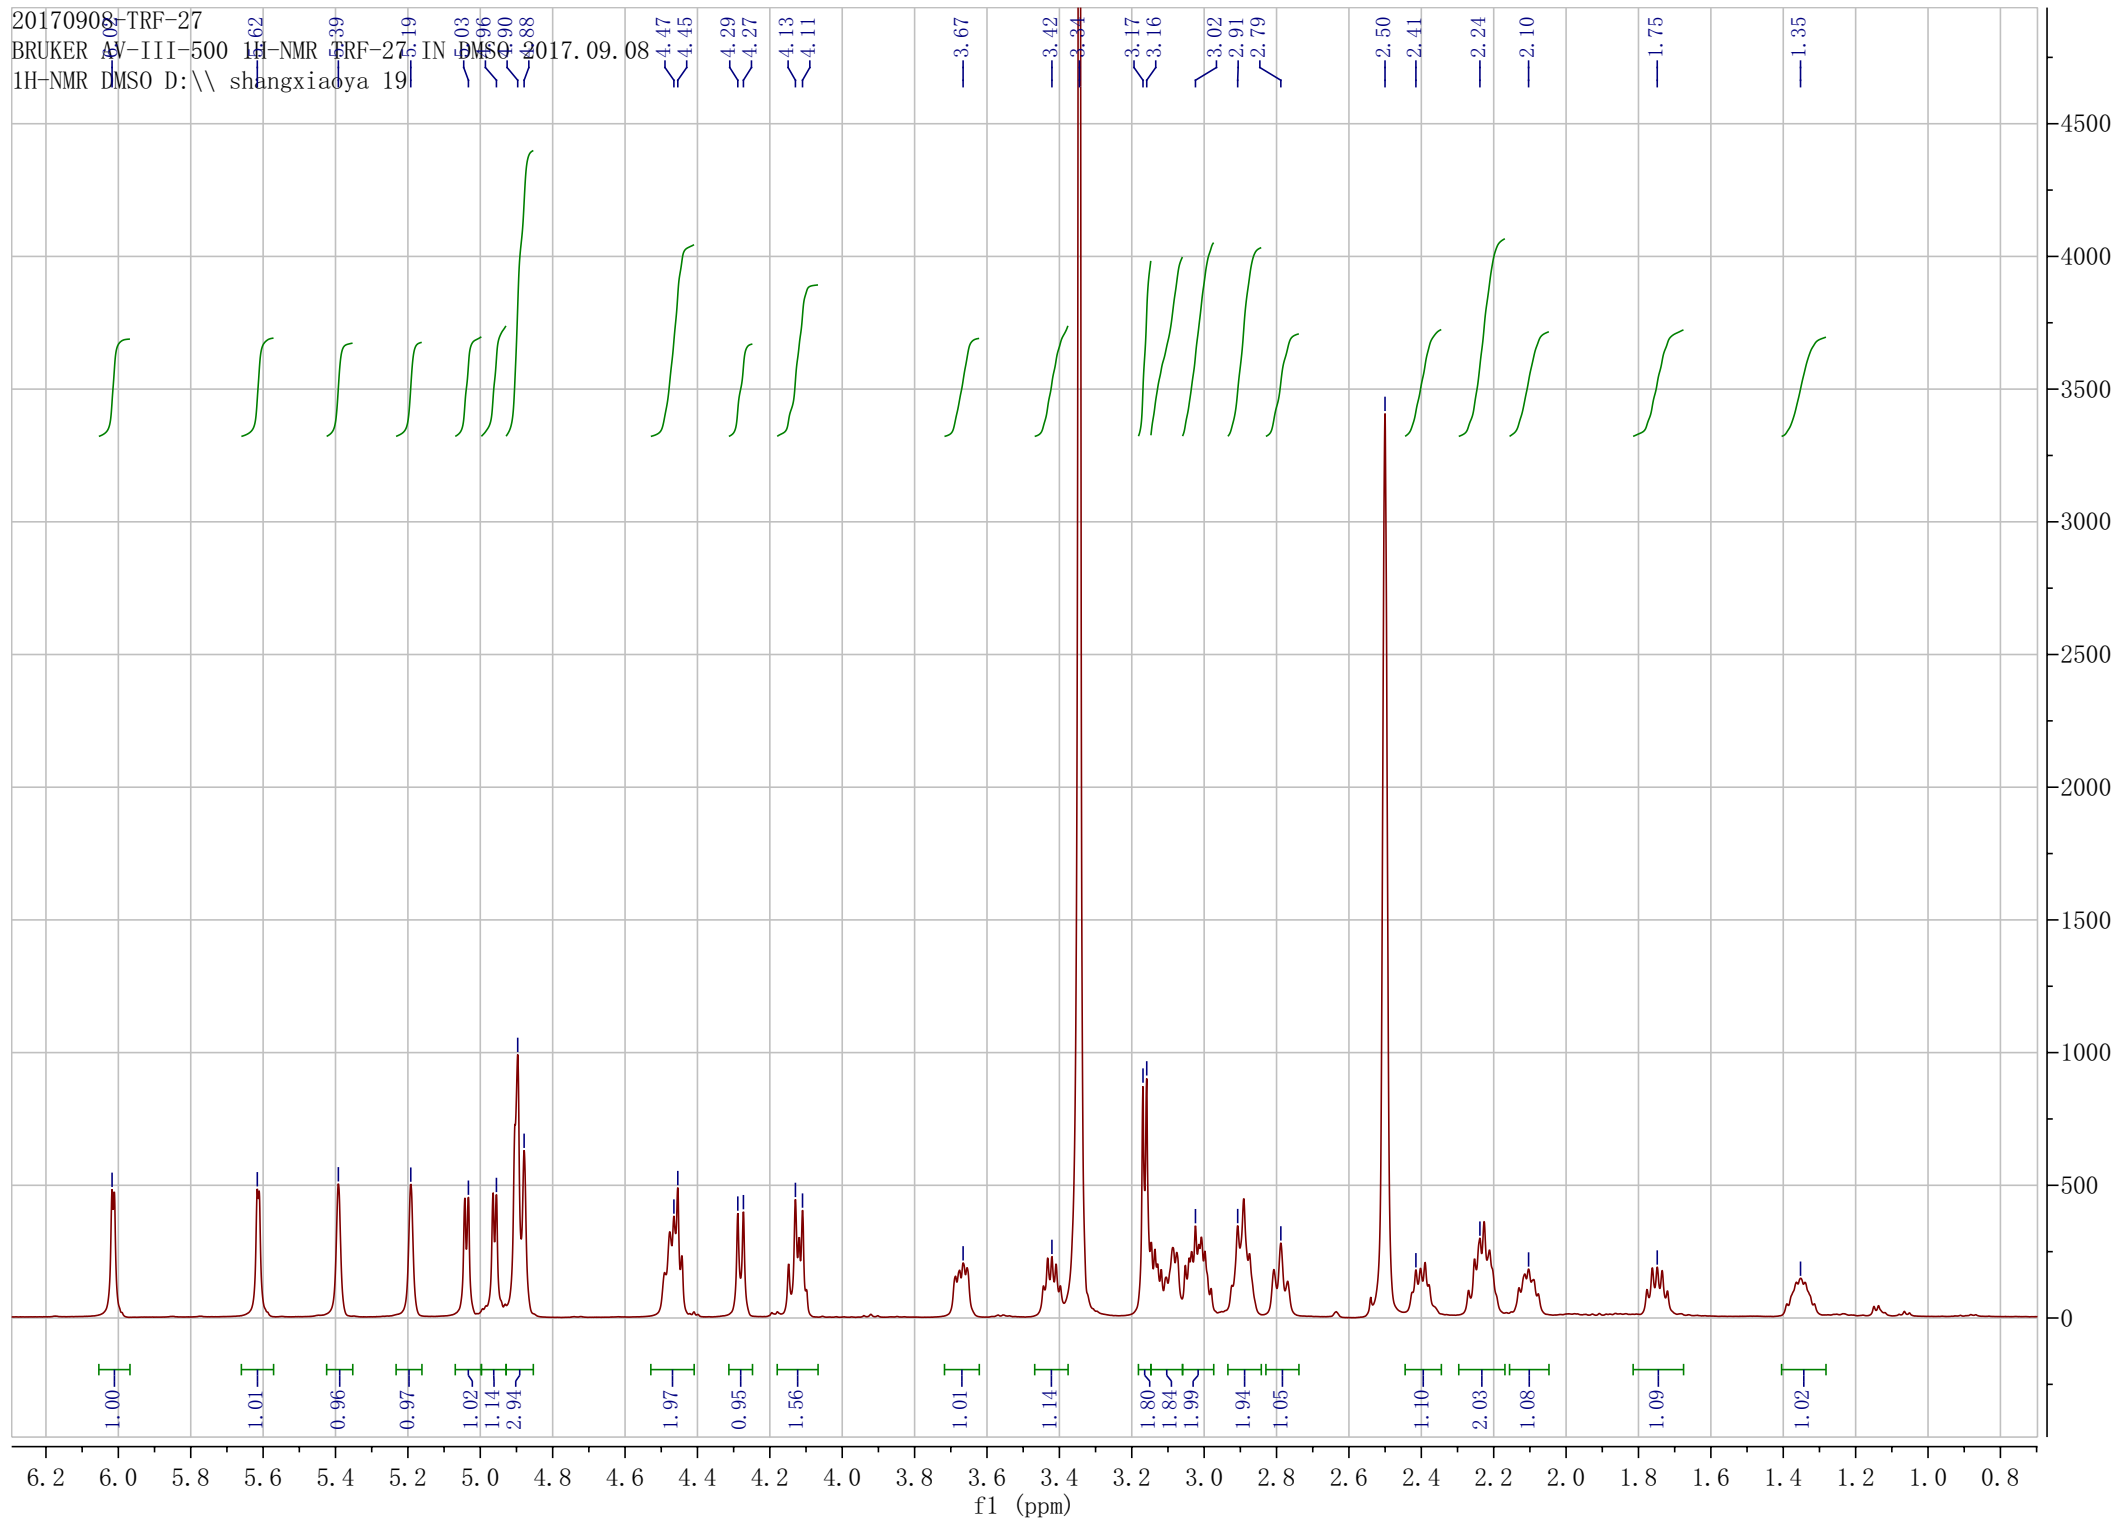

Supplement: s1 [file s1]

20170908-TRF-26  
BRUKER AV-500 1H-NMR TRF-26 IN DMSO-2017.09.08  
1H-NMR DMSO D:\\shangxiaoya-18

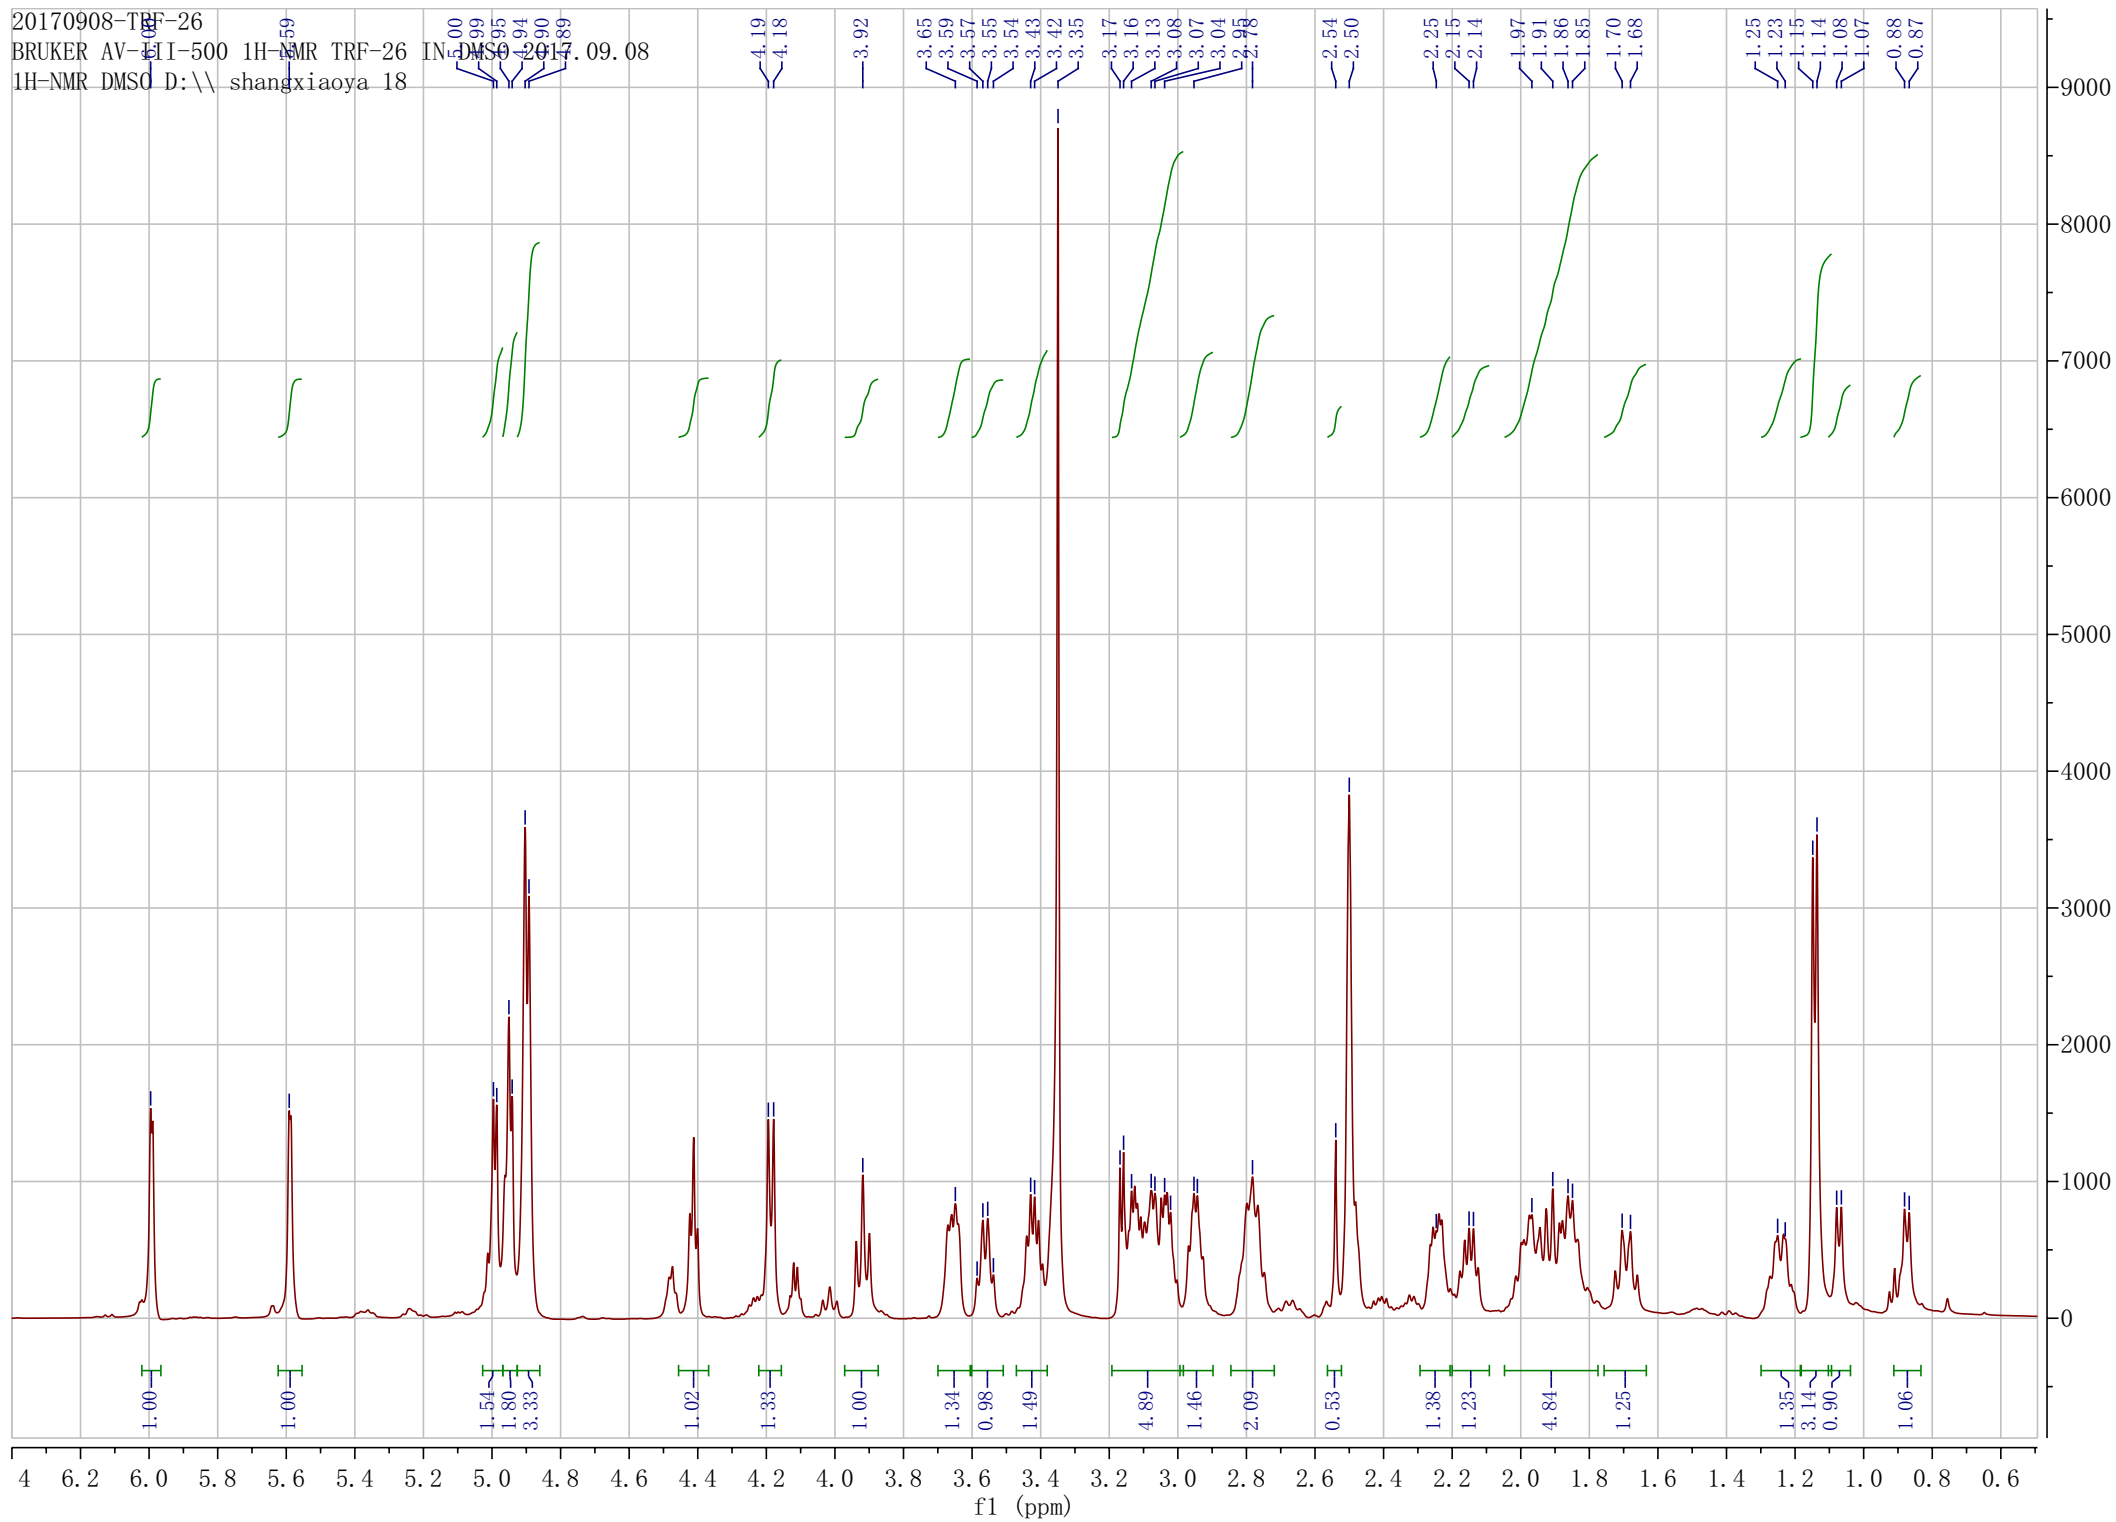

Supplement: s1 [file s1]

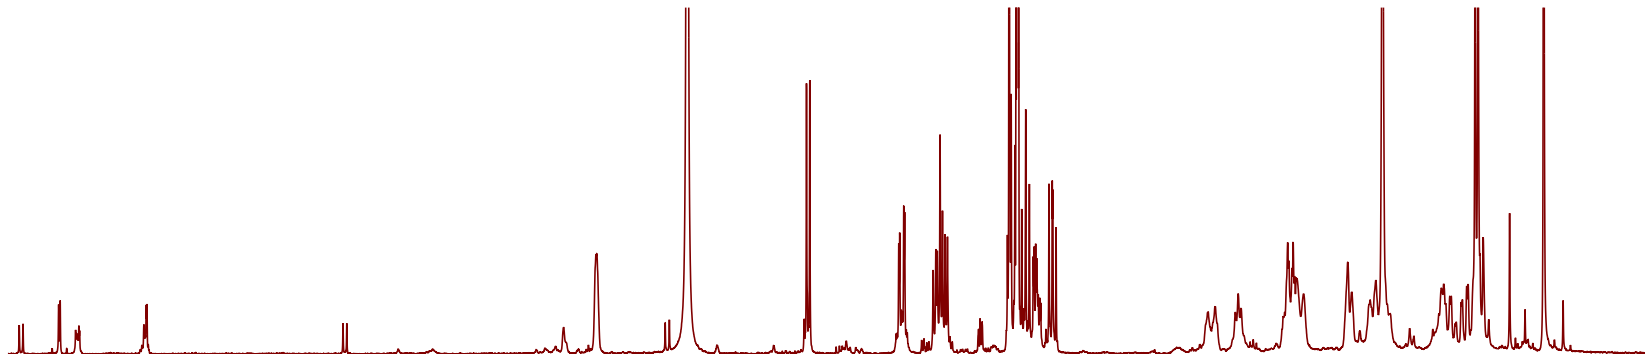

gHSQCAD\_01  
VNS-600 gHSQCAD TRF-40 IN cd3od Apr 2 2019

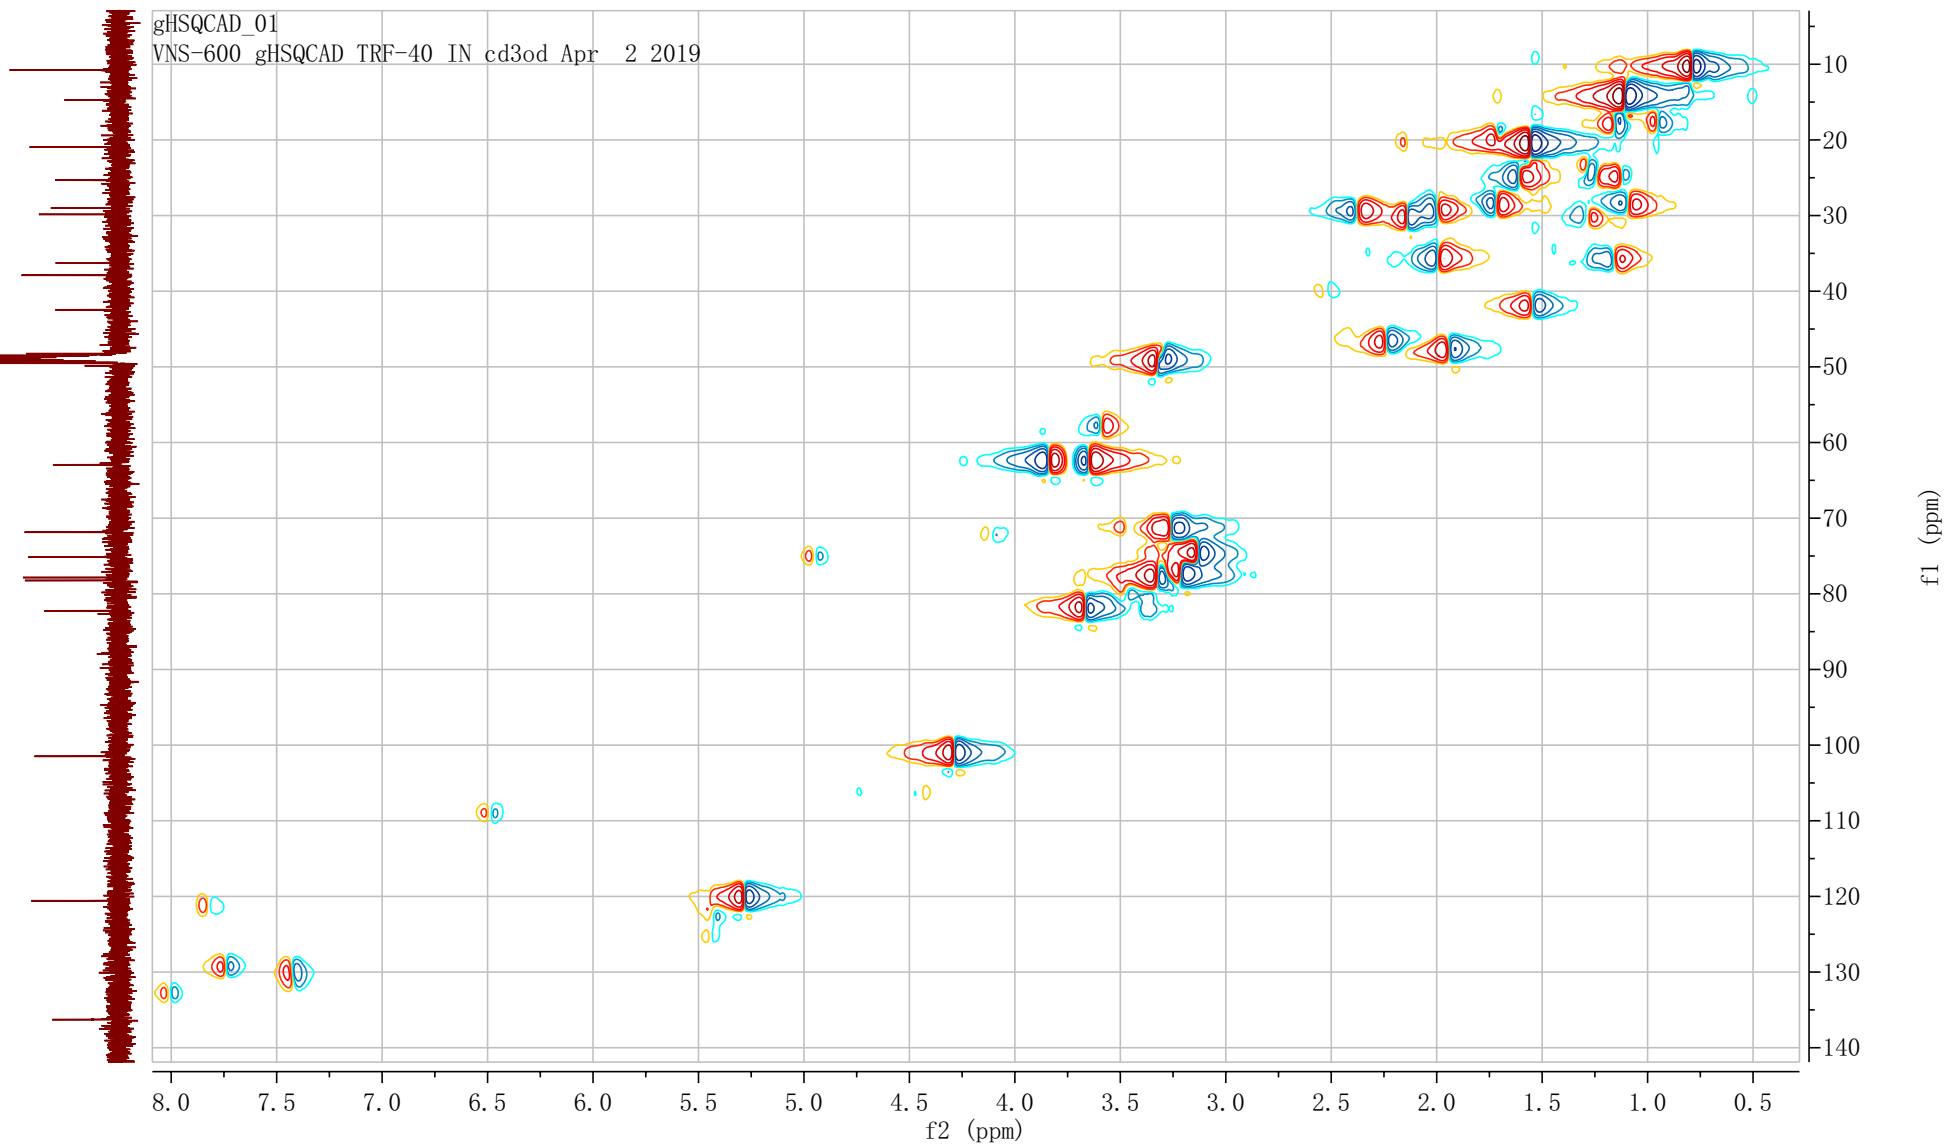

Supplement: s1 [file s1]

20180429-TRF-41

<sup>13</sup>C-NMR MeOD D:\\ shangxiaoya 34

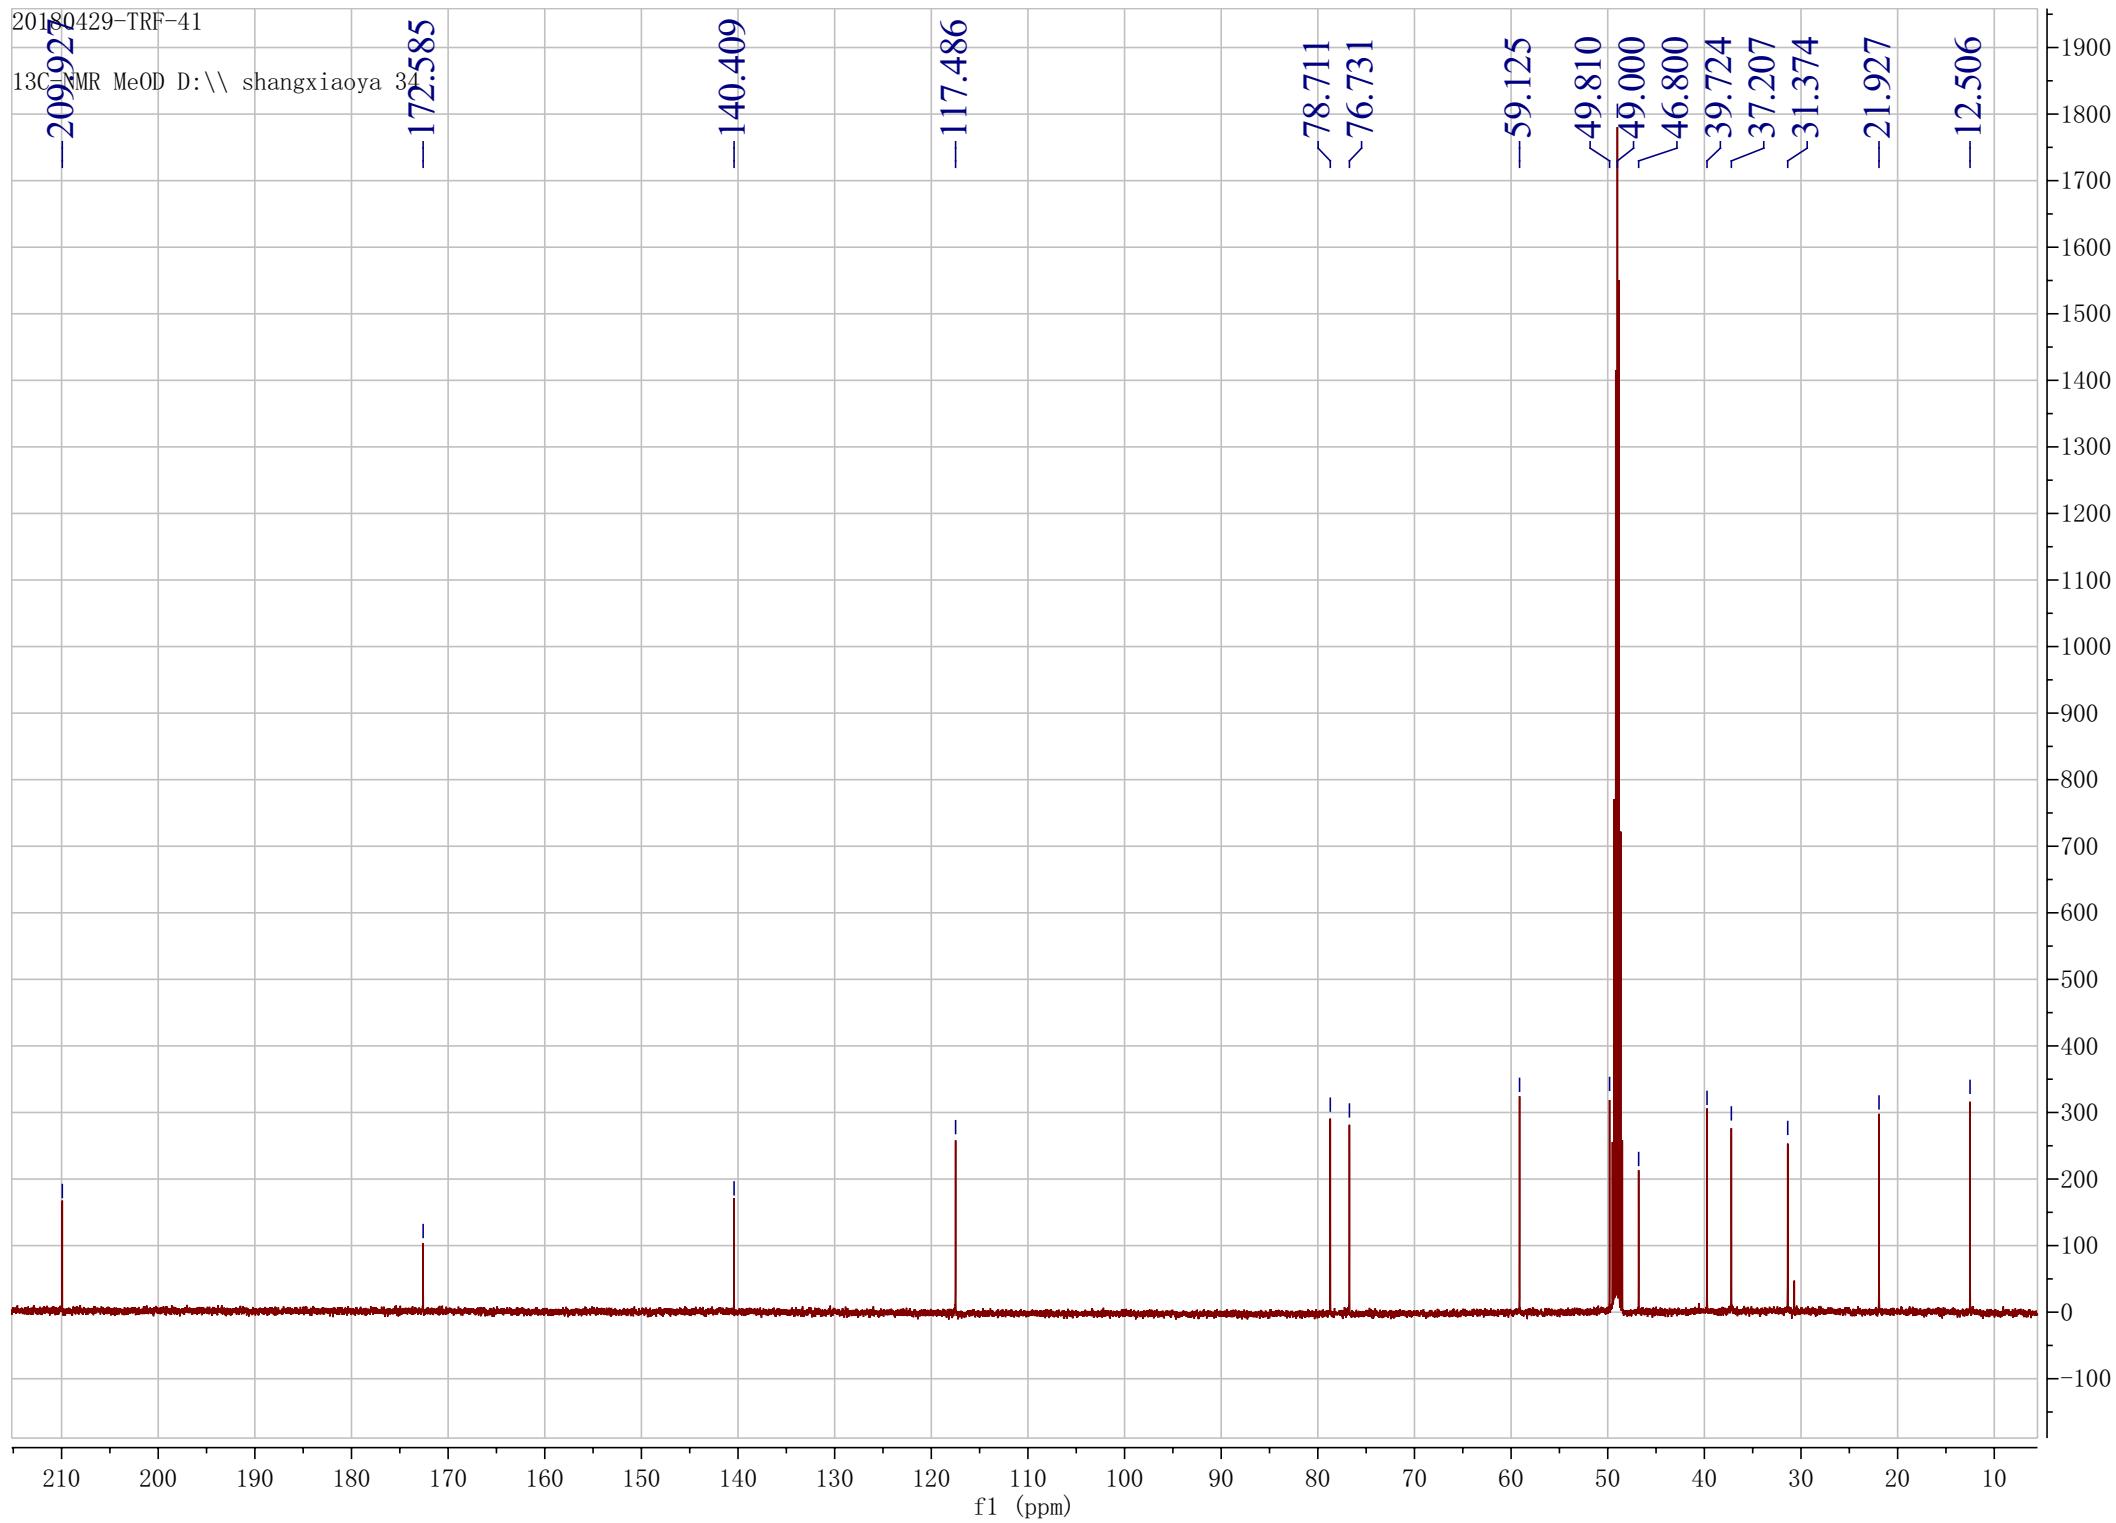

Supplement: s1 [file s1]

20170908-TRF-28  
BRUKER AV-III-500 1H-NMR TRF-28 IN DMSO-2017.09.08  
1H-NMR DMSO D:\shangxiaoya 20

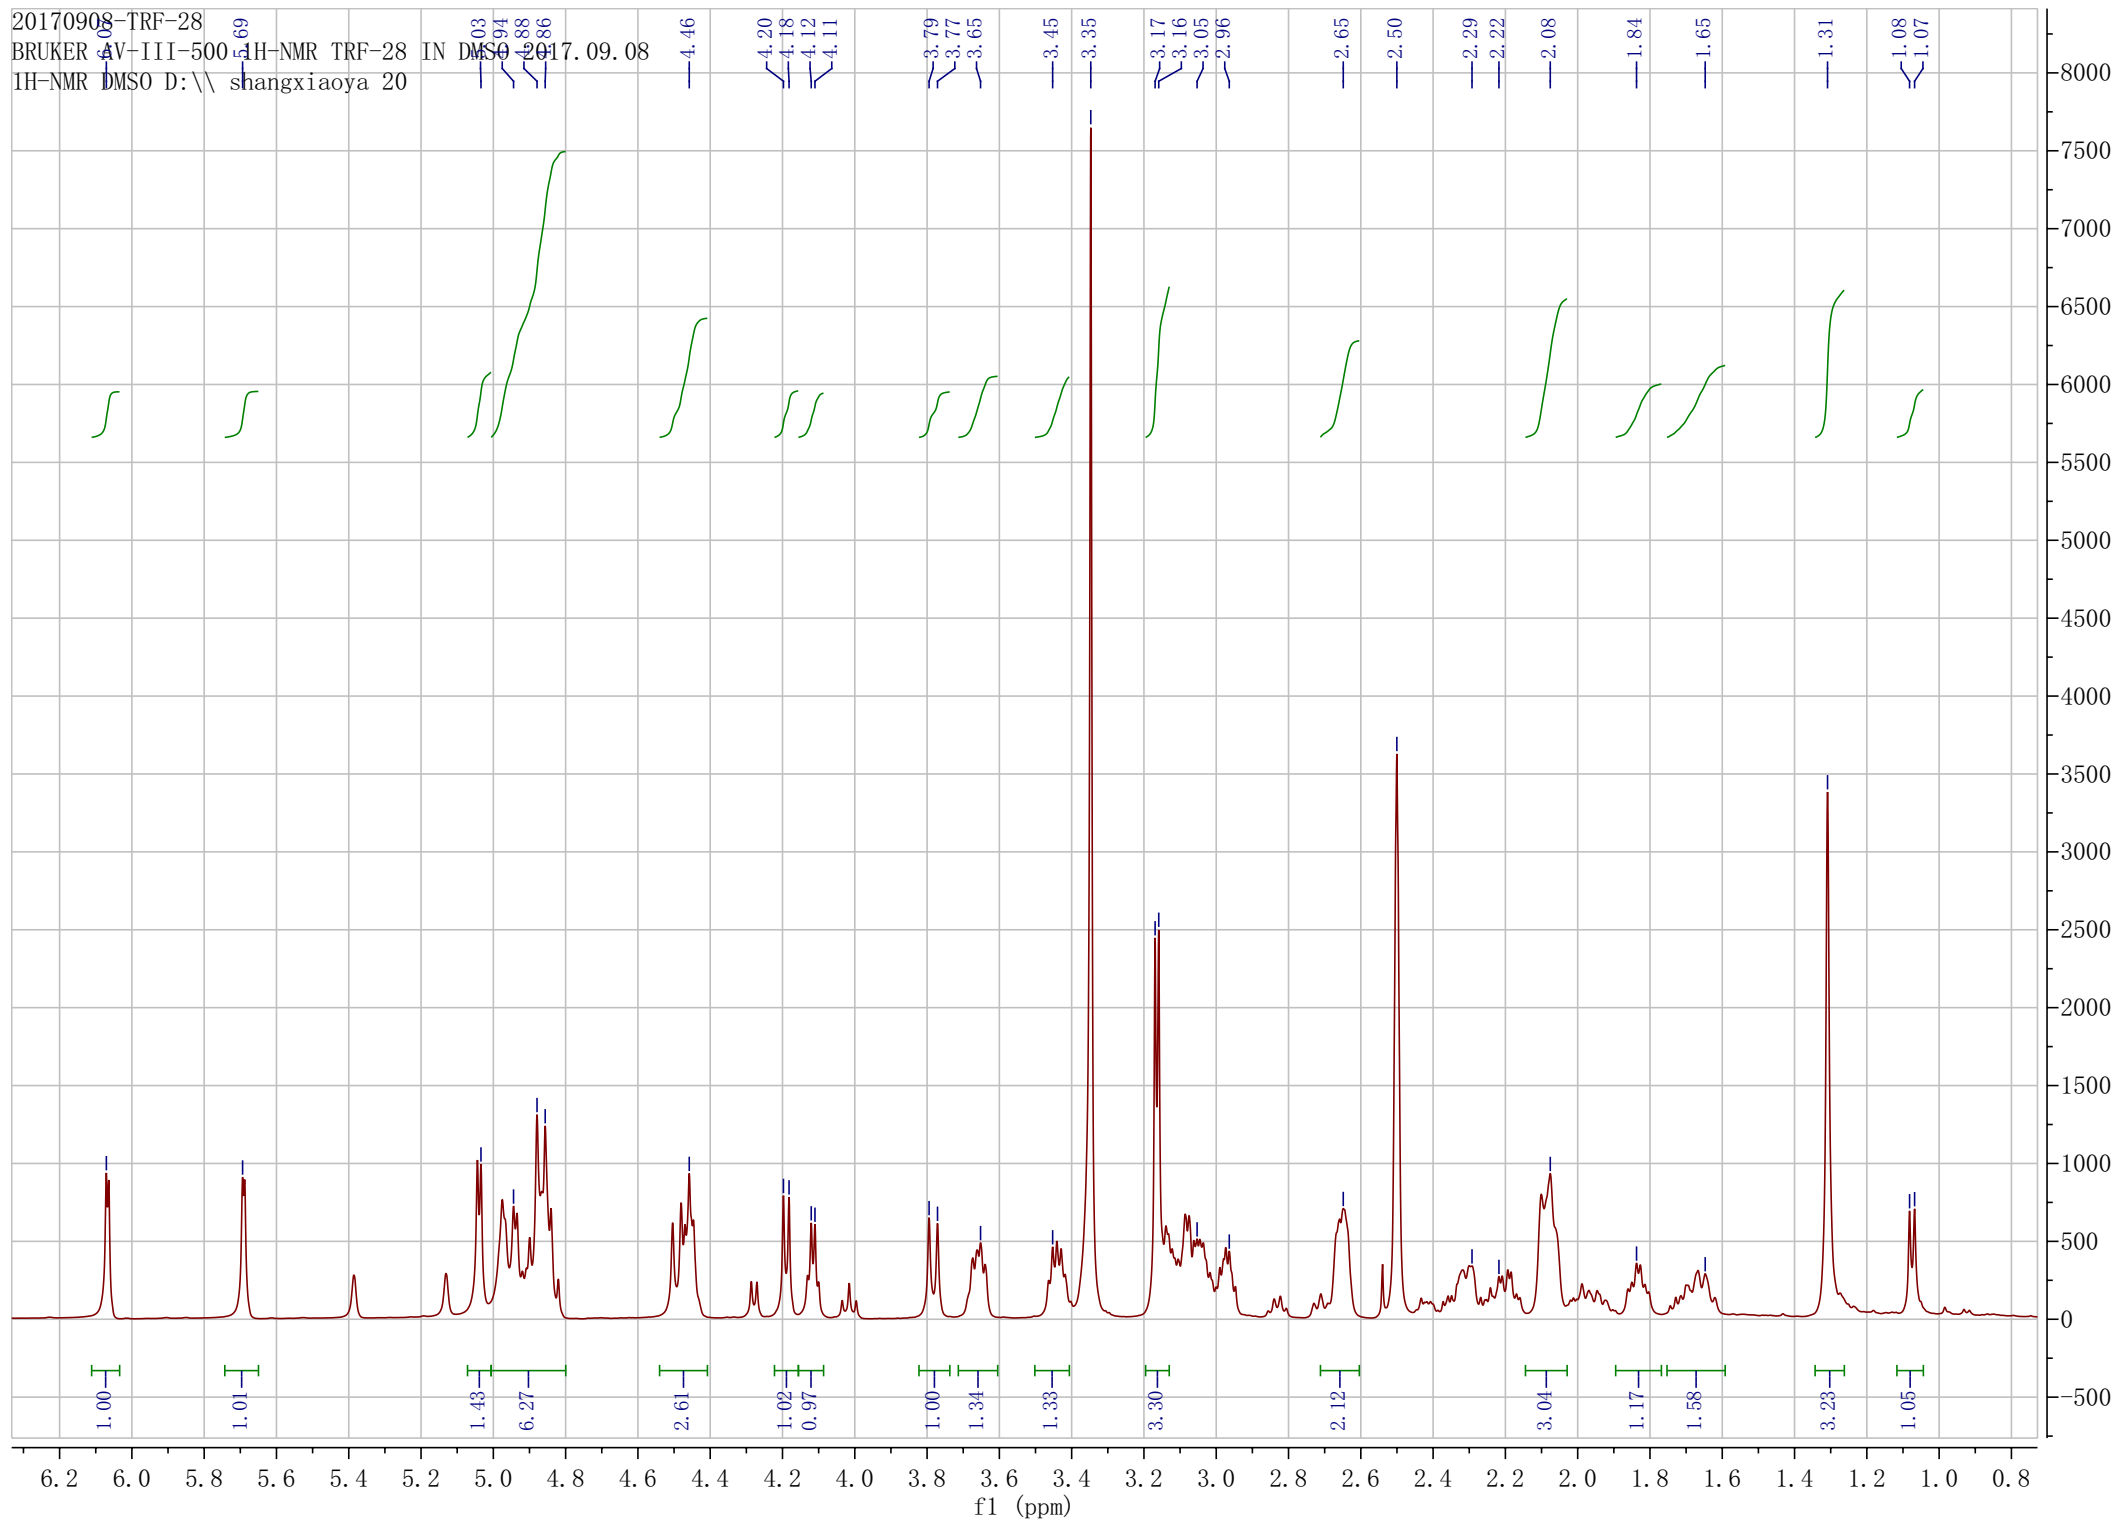

Supplement: s1 [file s1]

20180429-TRF-42

<sup>13</sup>C-NMR MeOD D:\shangxiangya-35

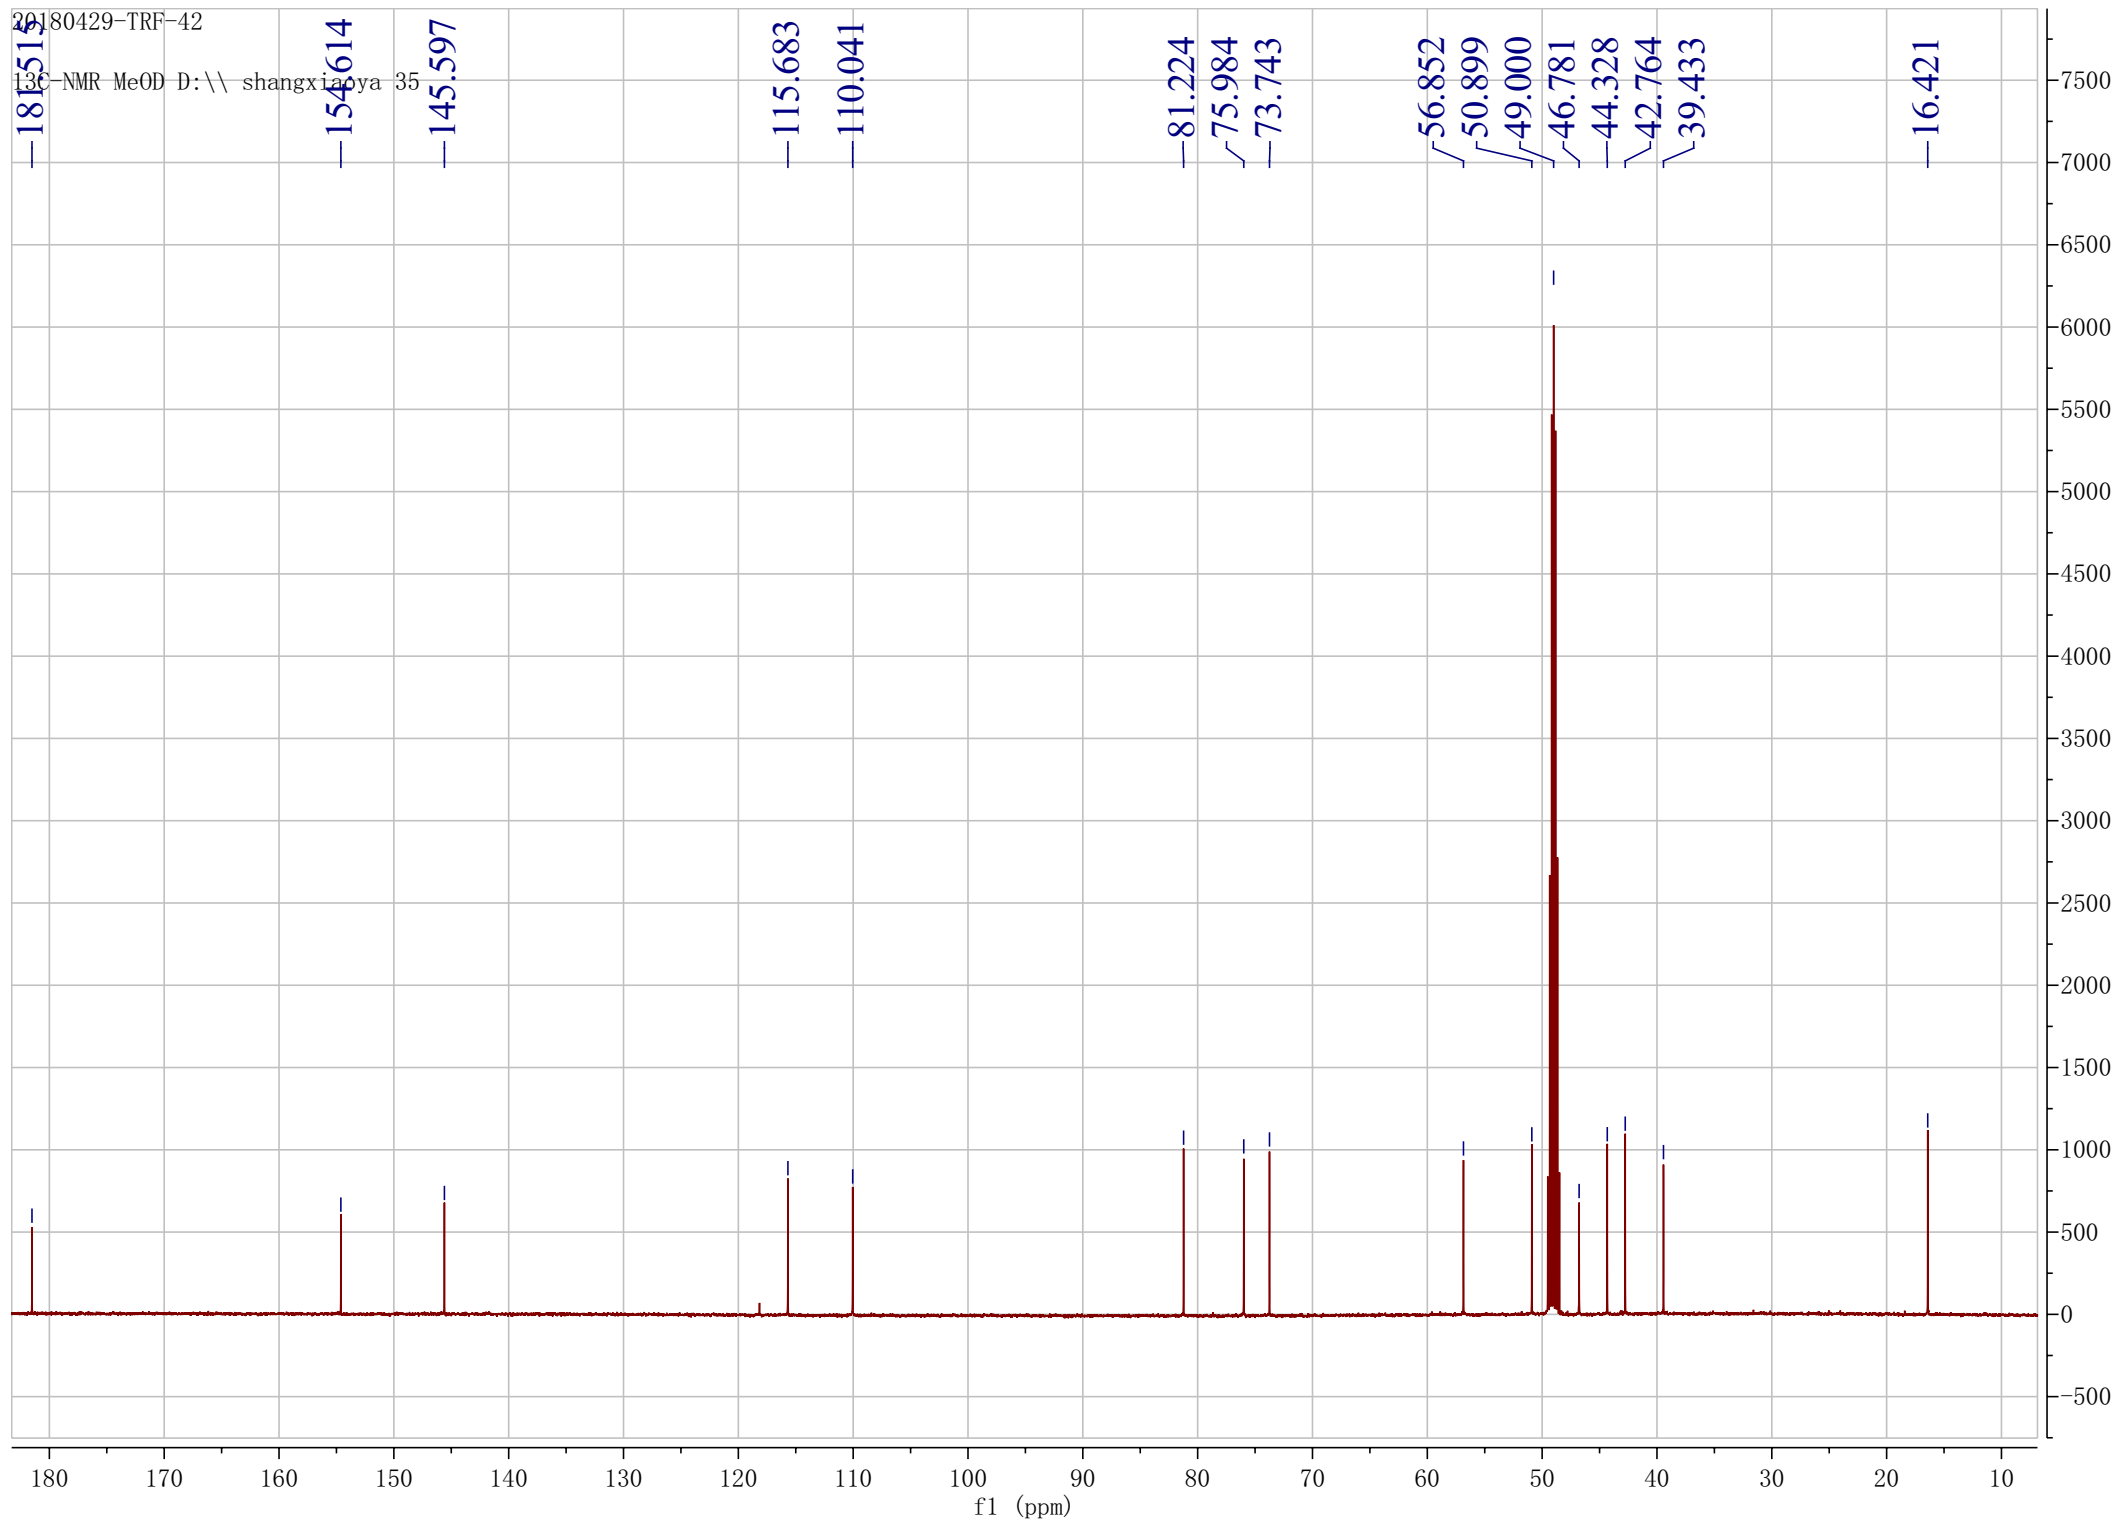

Supplement: s1 [file s1]

20170908-TRF-26  
BRUKER AV-III-500 13C-NMR TRF-26 1N DMSO 2017.09.08  
13C-NMR DMSO D:\\ shangxiaoya 18

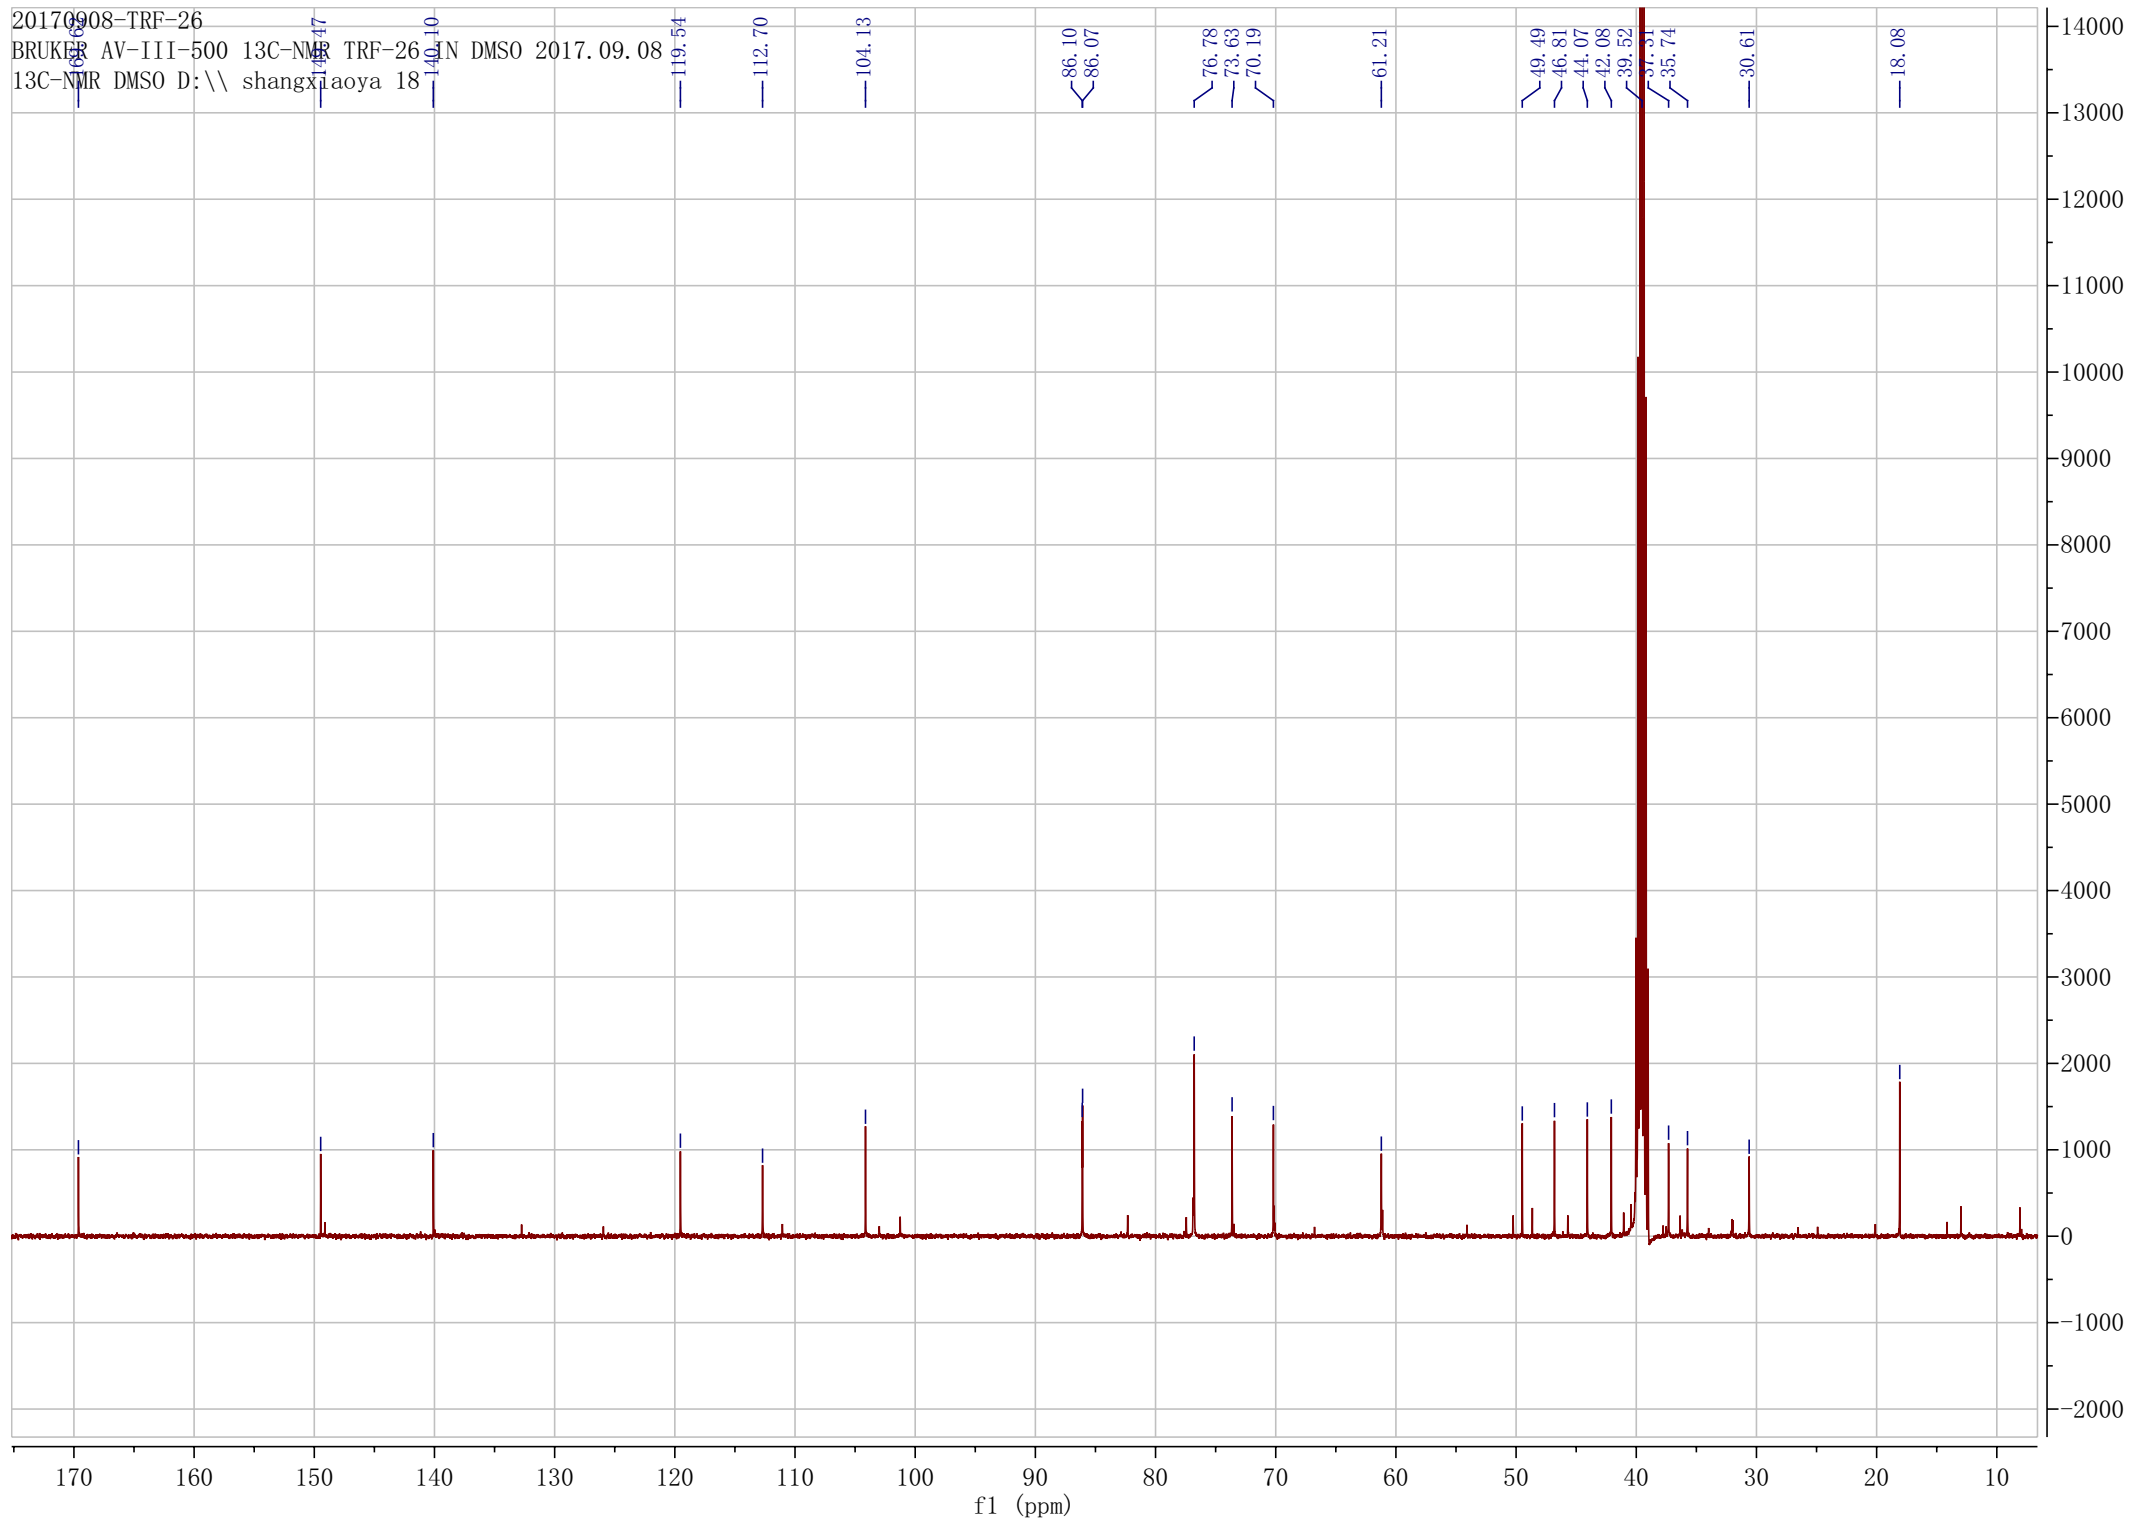

Supplement: s1 [file s1]

20170908-TRF-28  
BRUKER AV-III-500 13C-NMR TRF-28  
13C-NMR DMSO D:\ shangxiaoya 2017.09.08

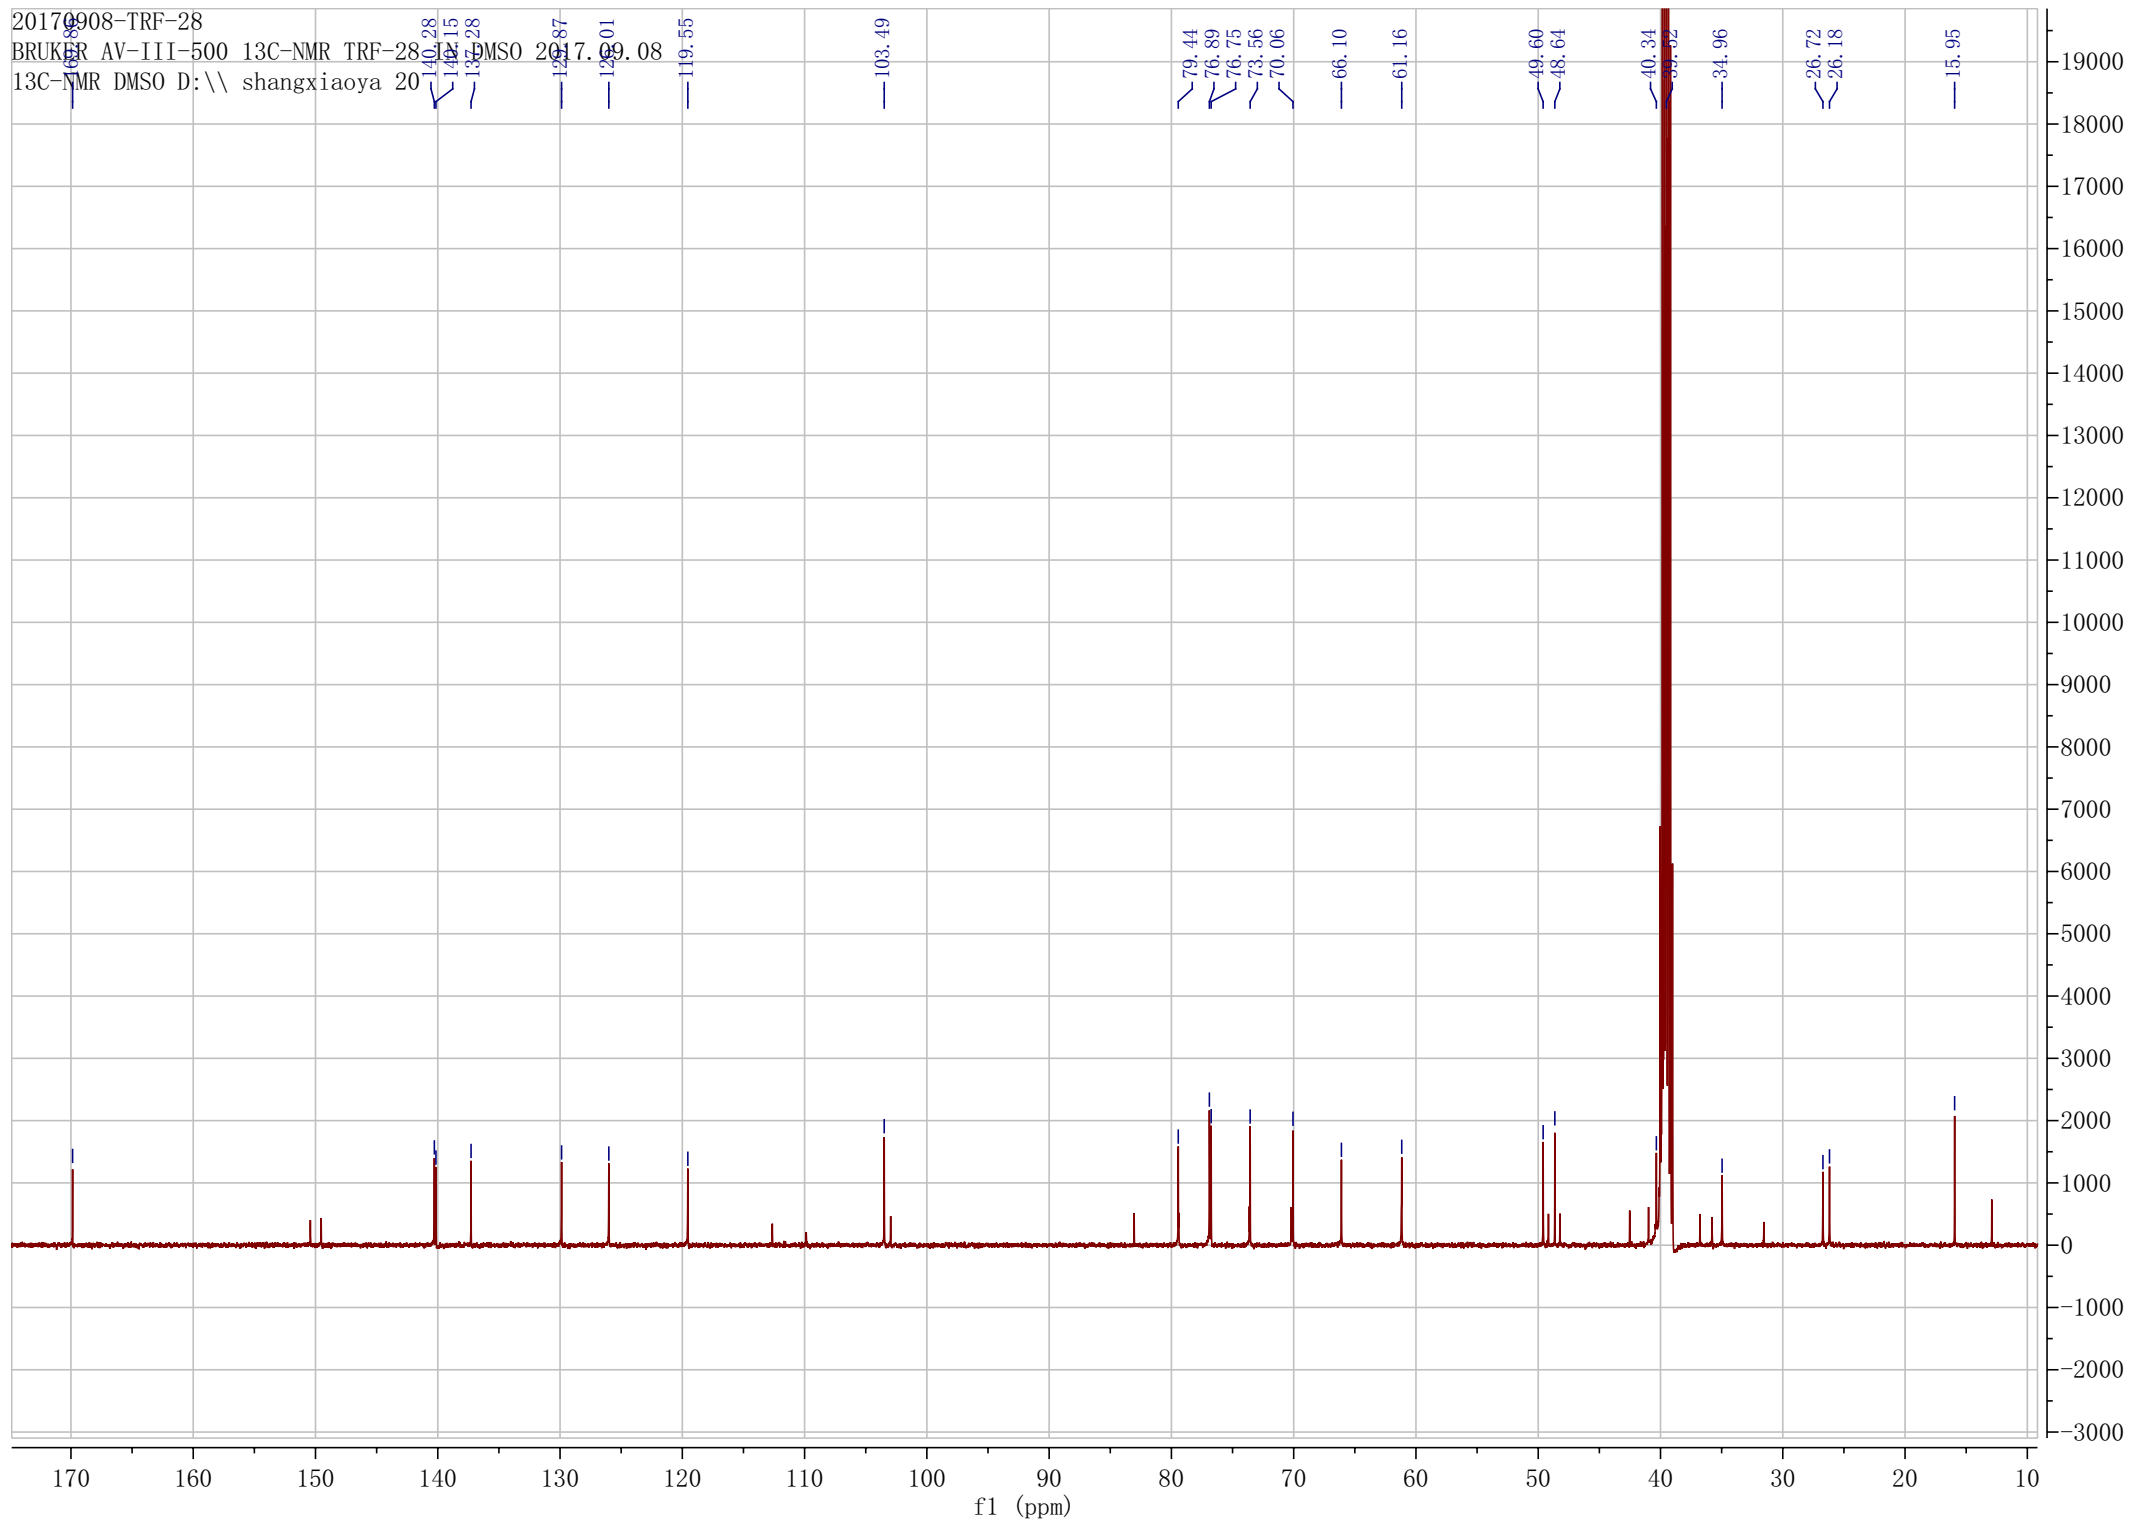

Supplement: s1 [file s1]

TRF-29\_Pos\_FullMs #437 RT: 2.21 AV: 1 NL: 1.09E9  
T: FTMS + p ESI Full ms [50.0000-500.0000]

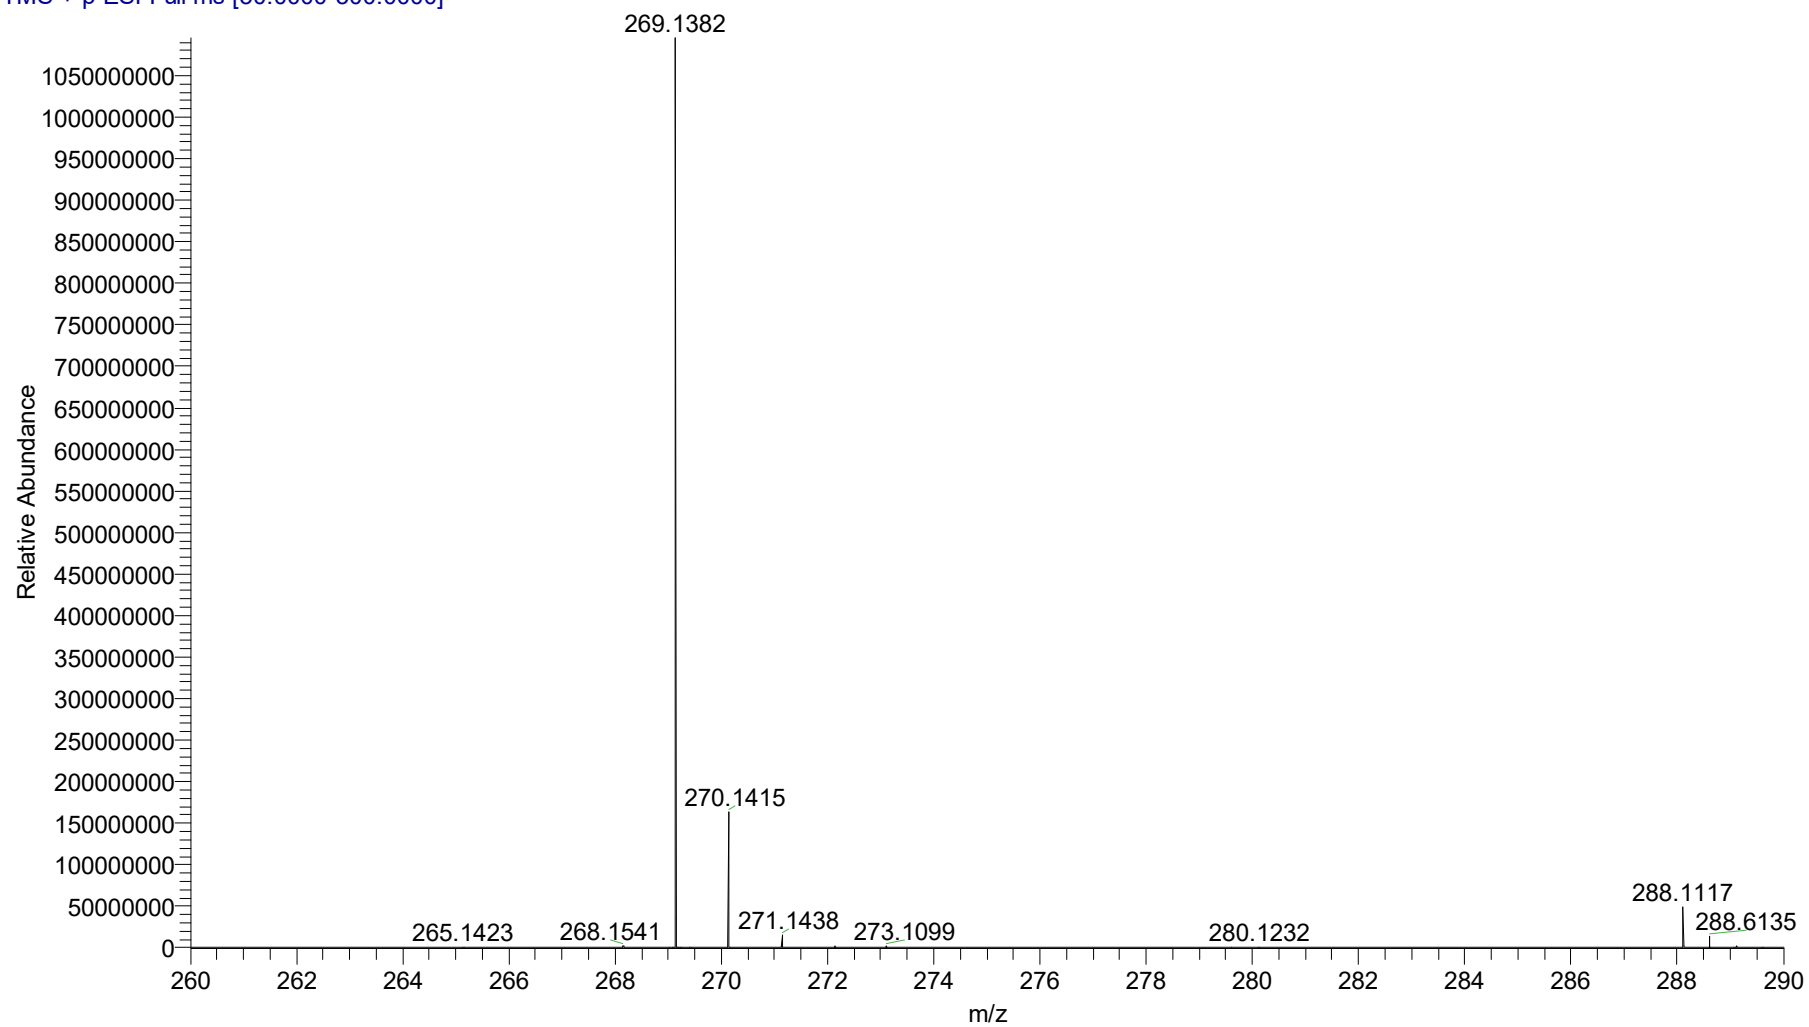

Supplement: s1 [file s1]

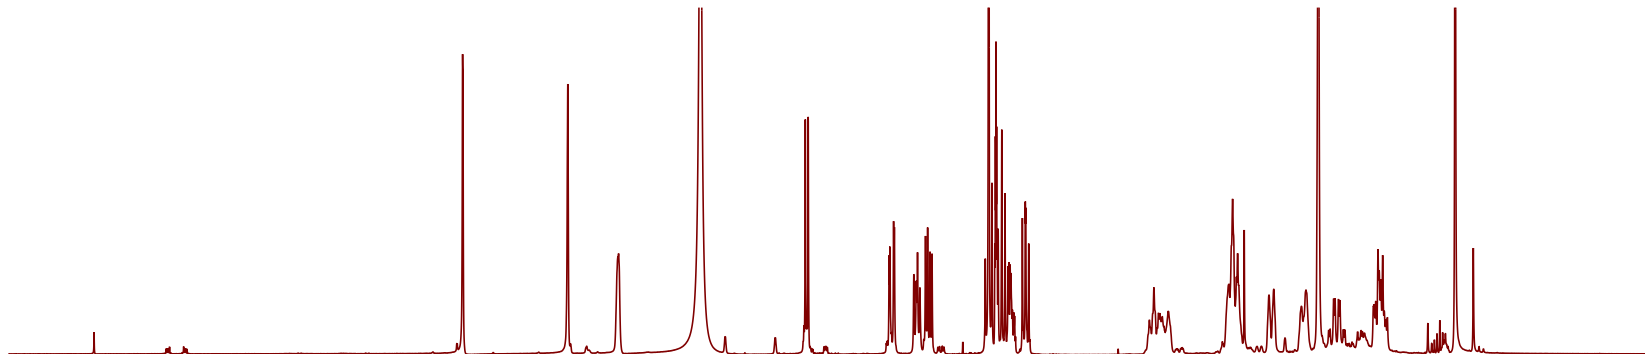

20180601-TRF-38

HSQCETGPSI MeOD D:\\ shangxiaoya 37

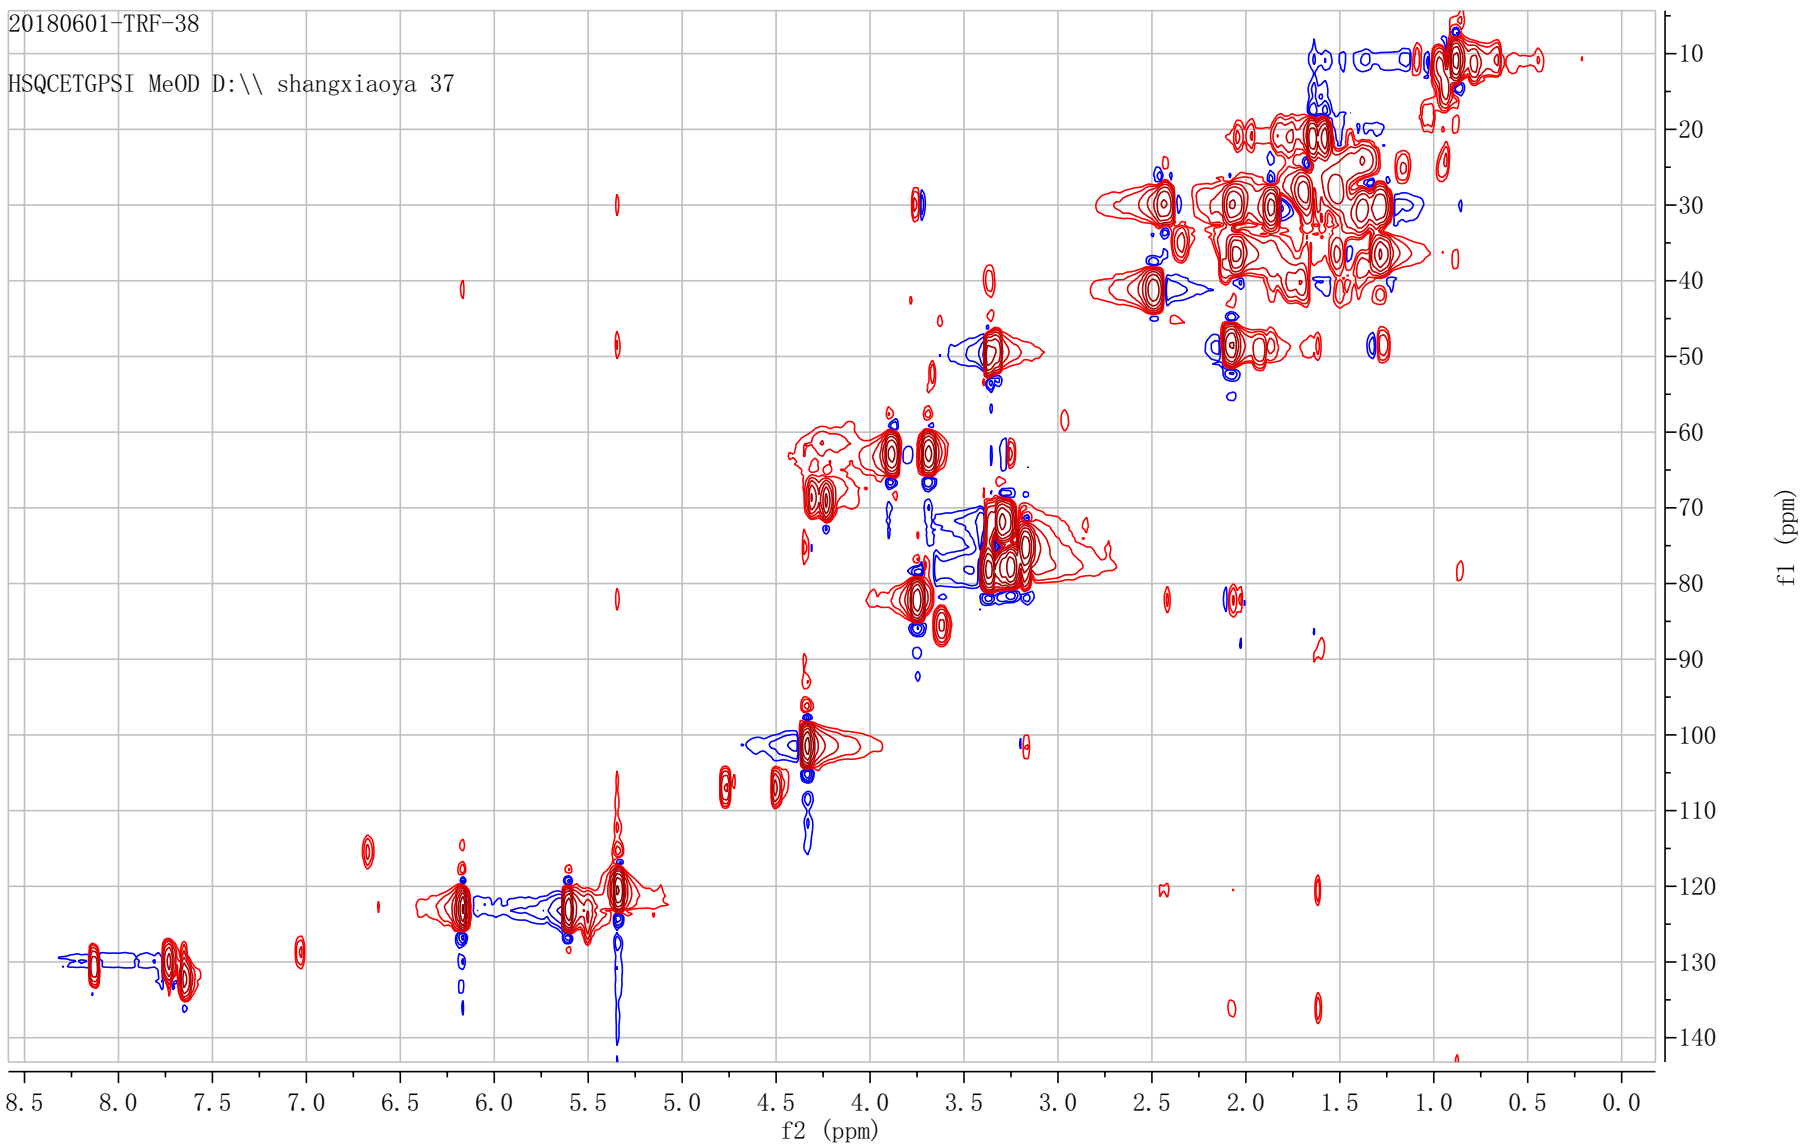

Supplement: s1 [file s1]

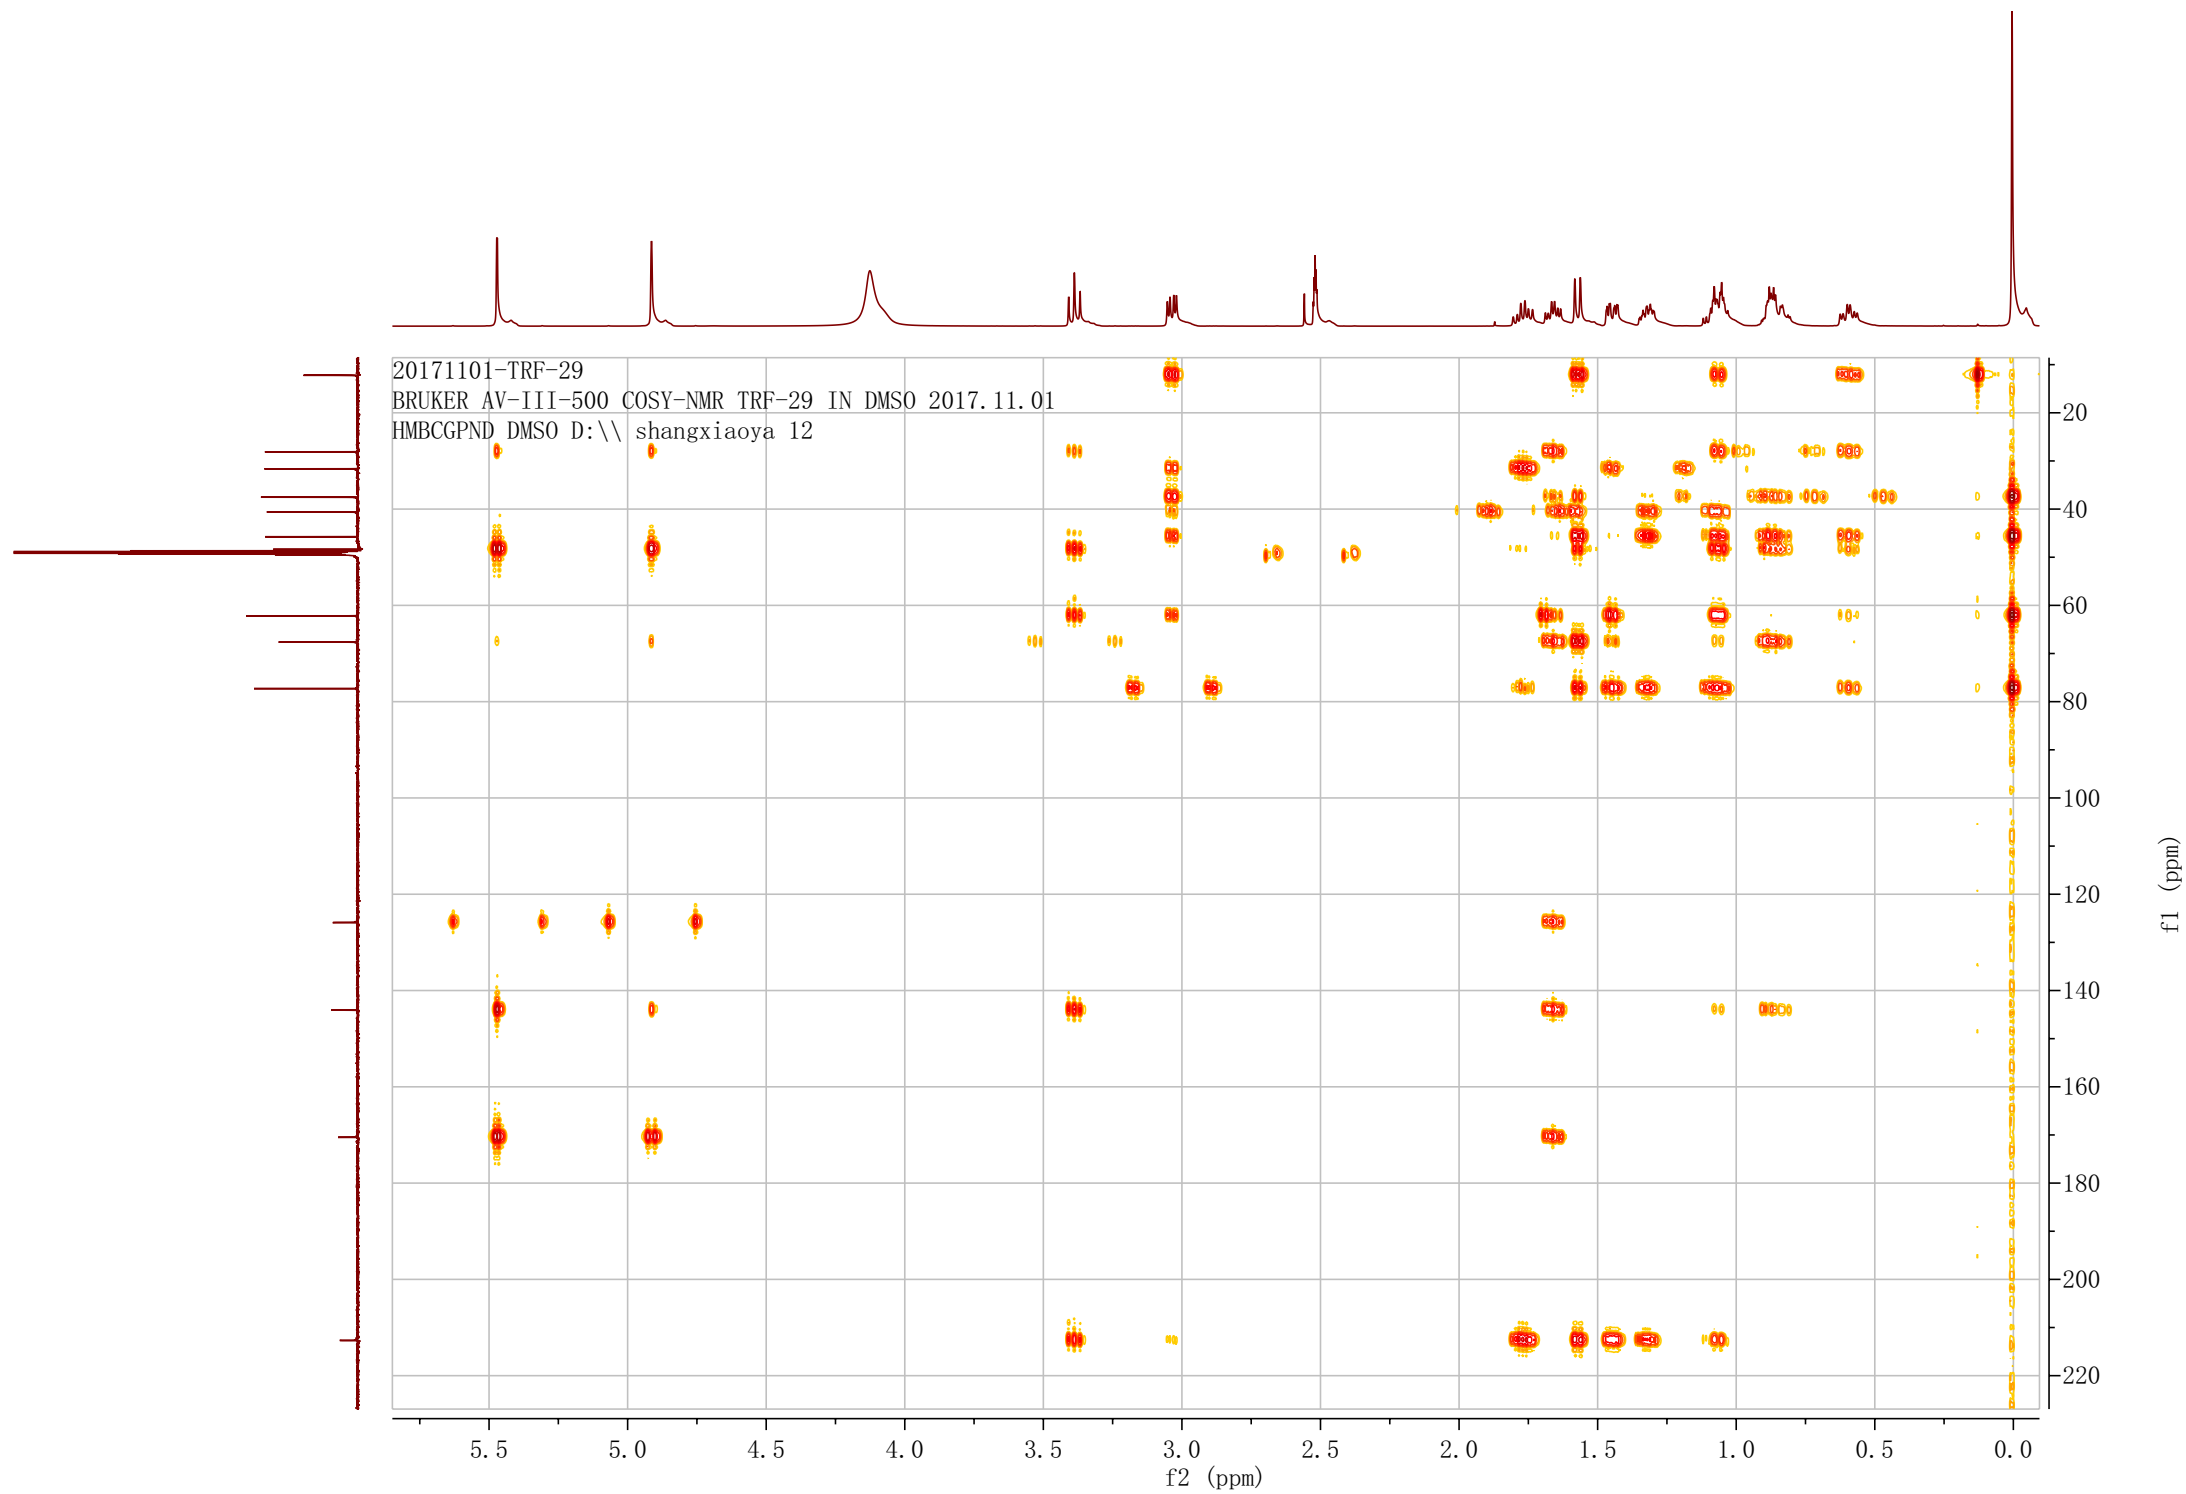

Supplement: s1 [file s1]

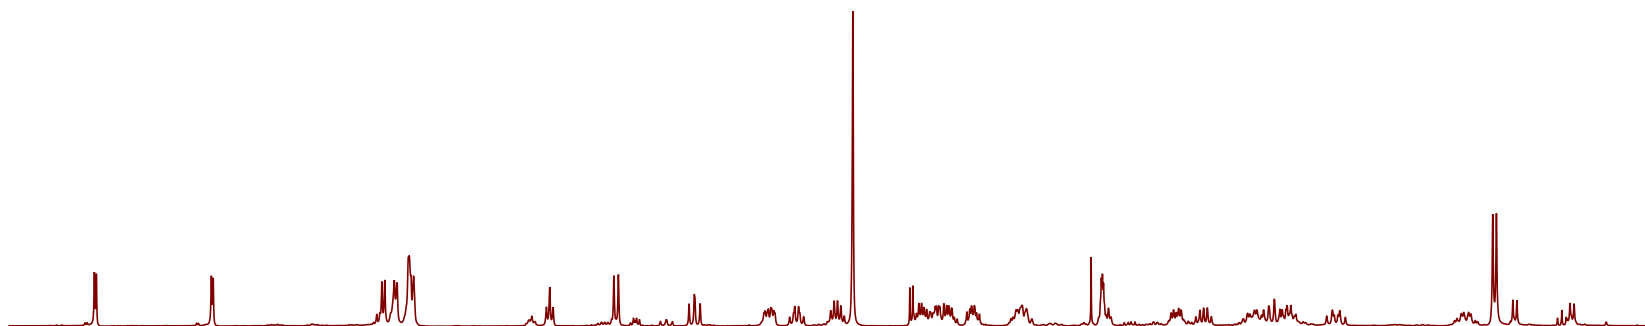

20171101-TRF-26  
BRUKER AV-III-500 COSY-NMR TRF-26 IN DMSO 2017.11.01  
HSQCETGPSI DMSO D:\\ shangxiaoya 4

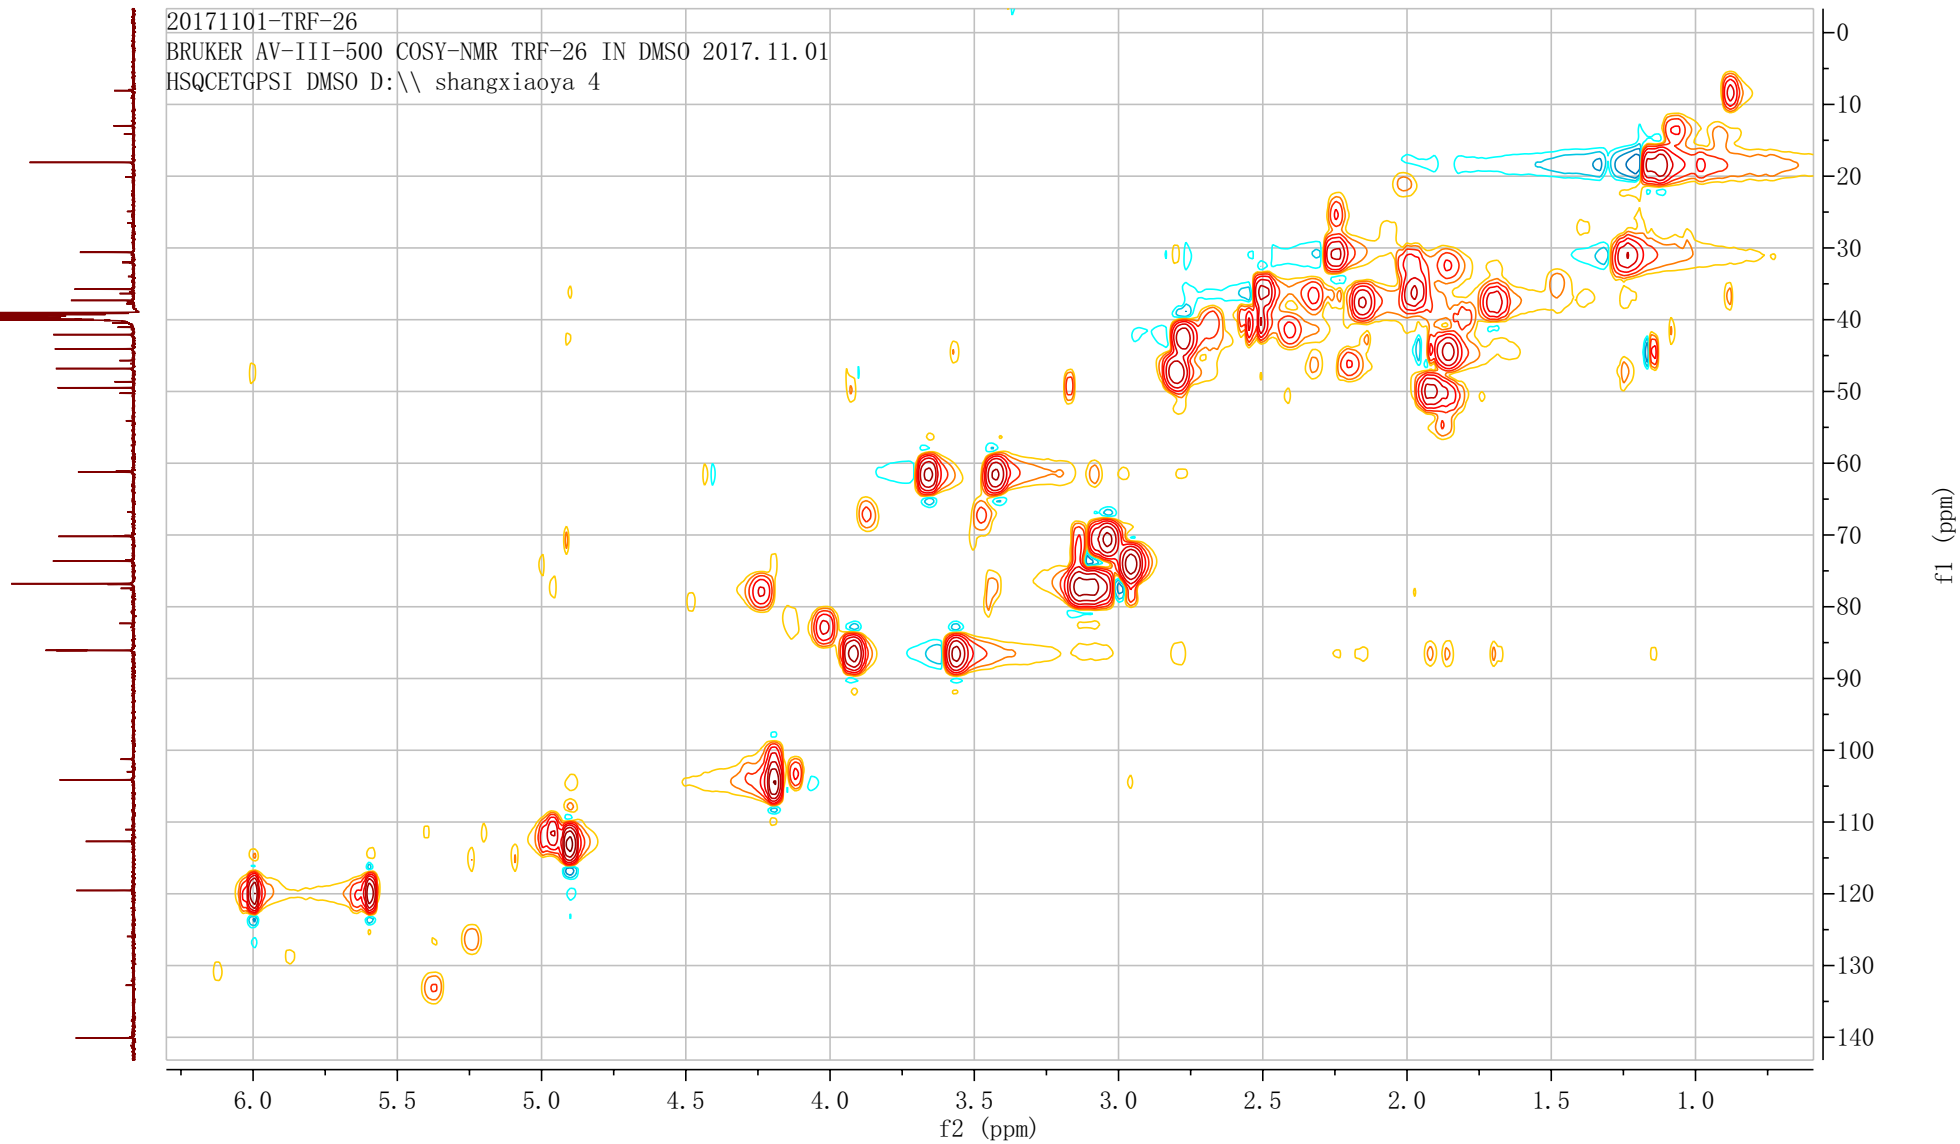

Supplement: s1 [file s1]

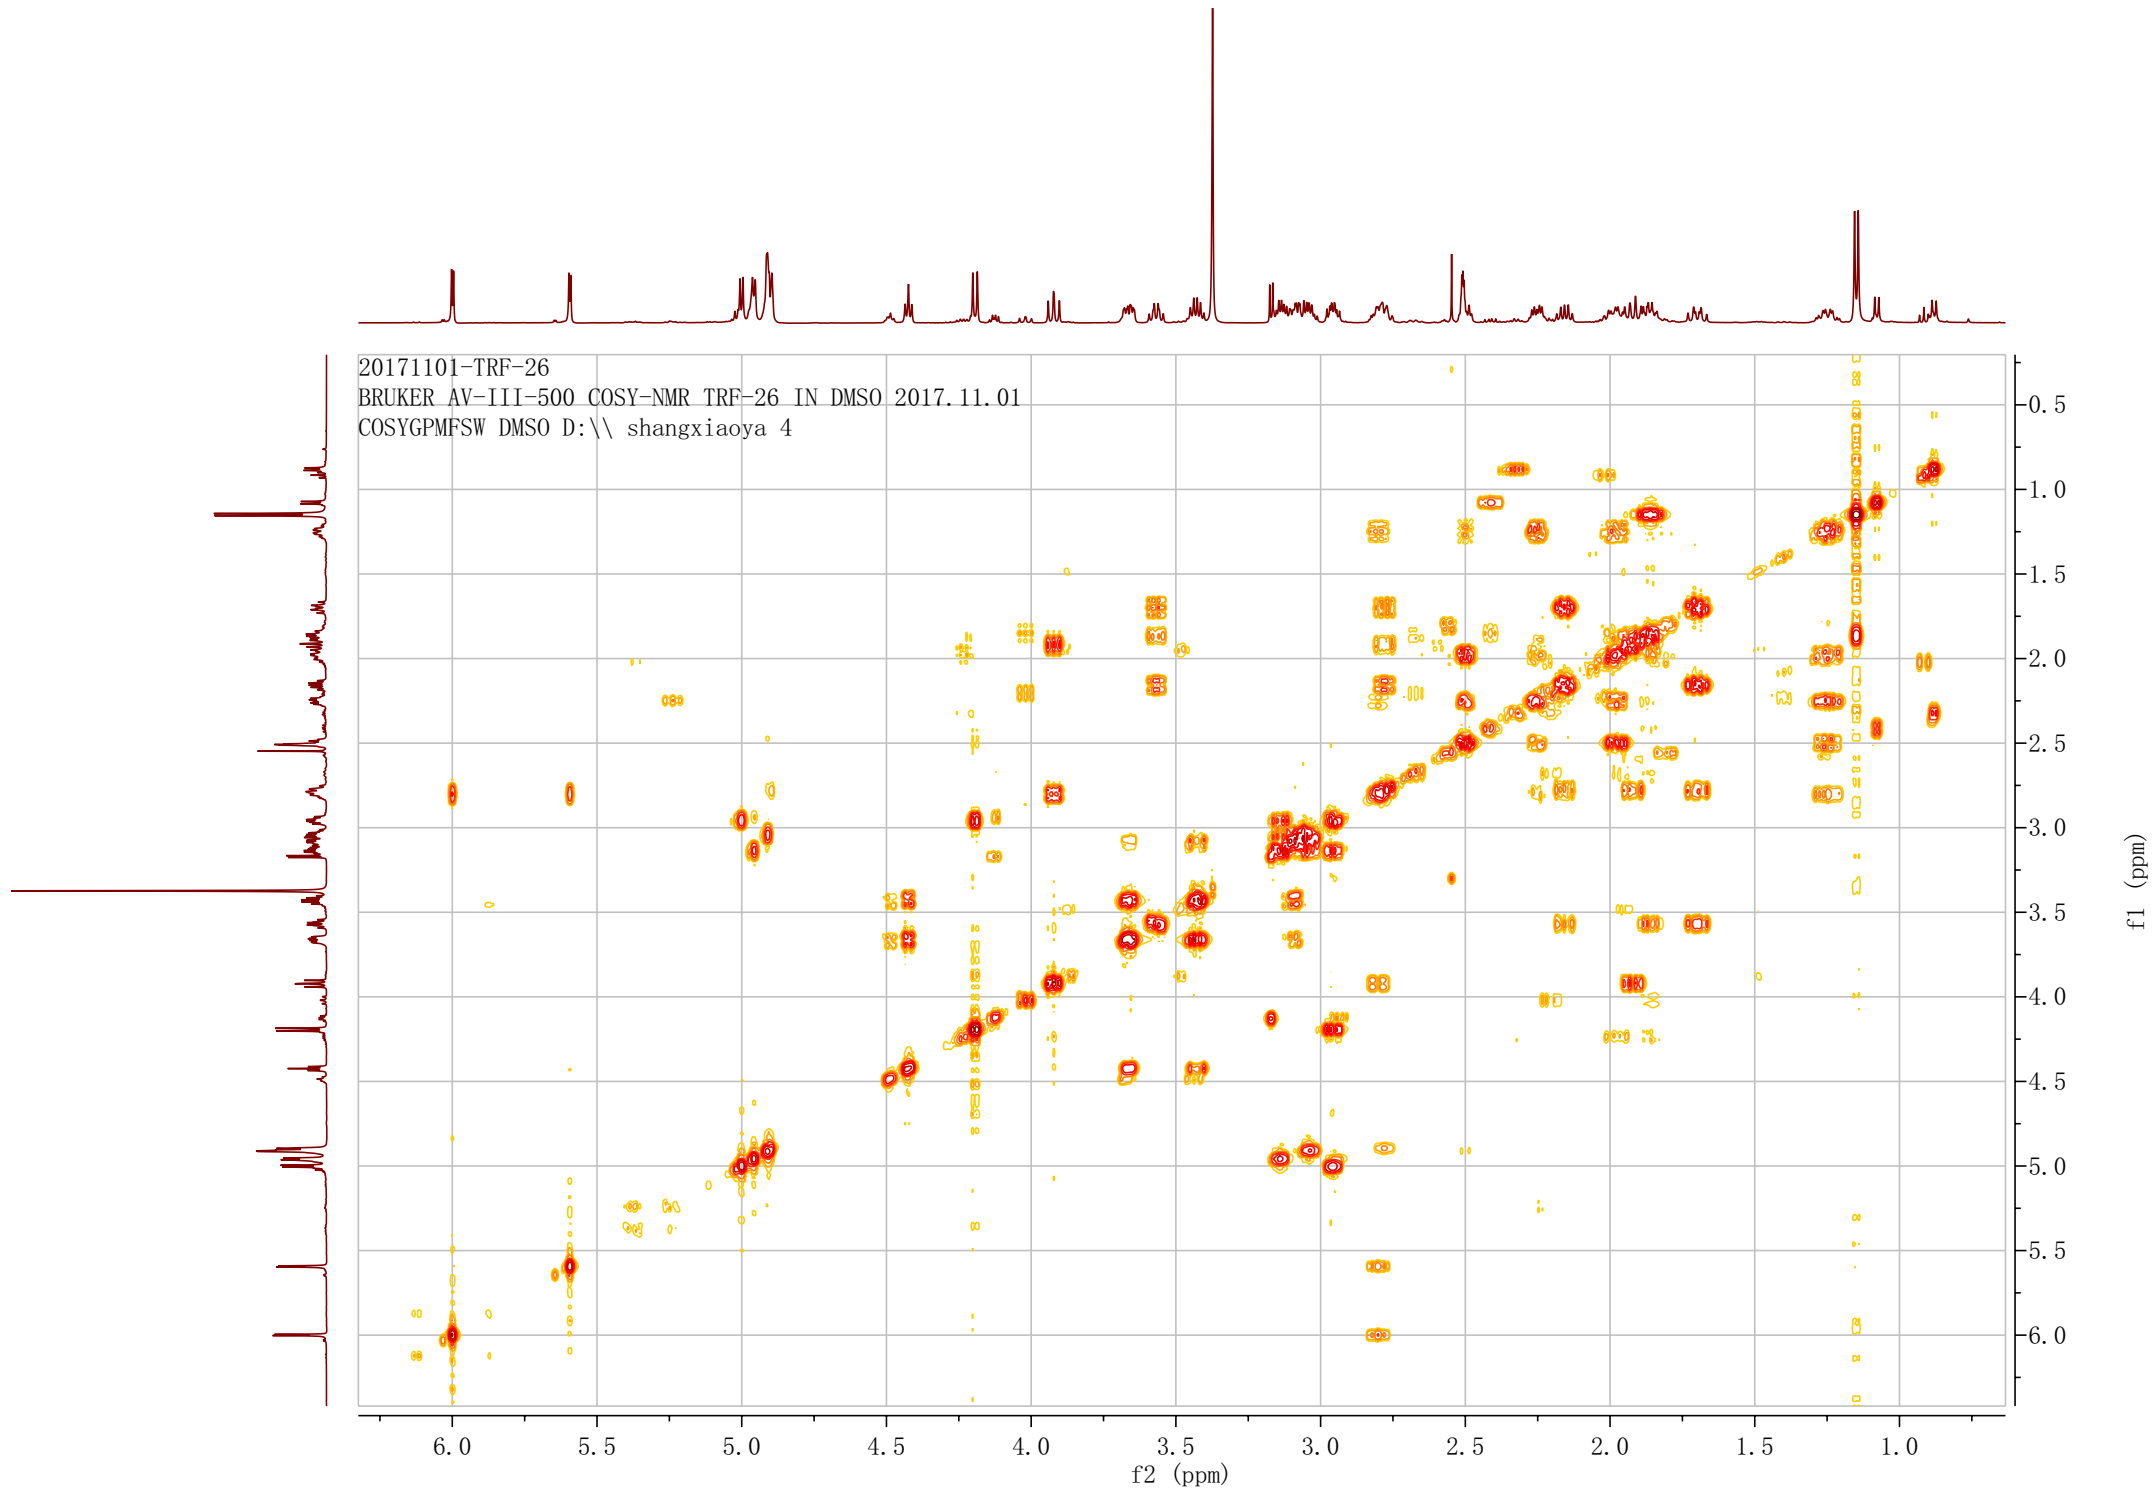

Supplement: s1 [file s1]

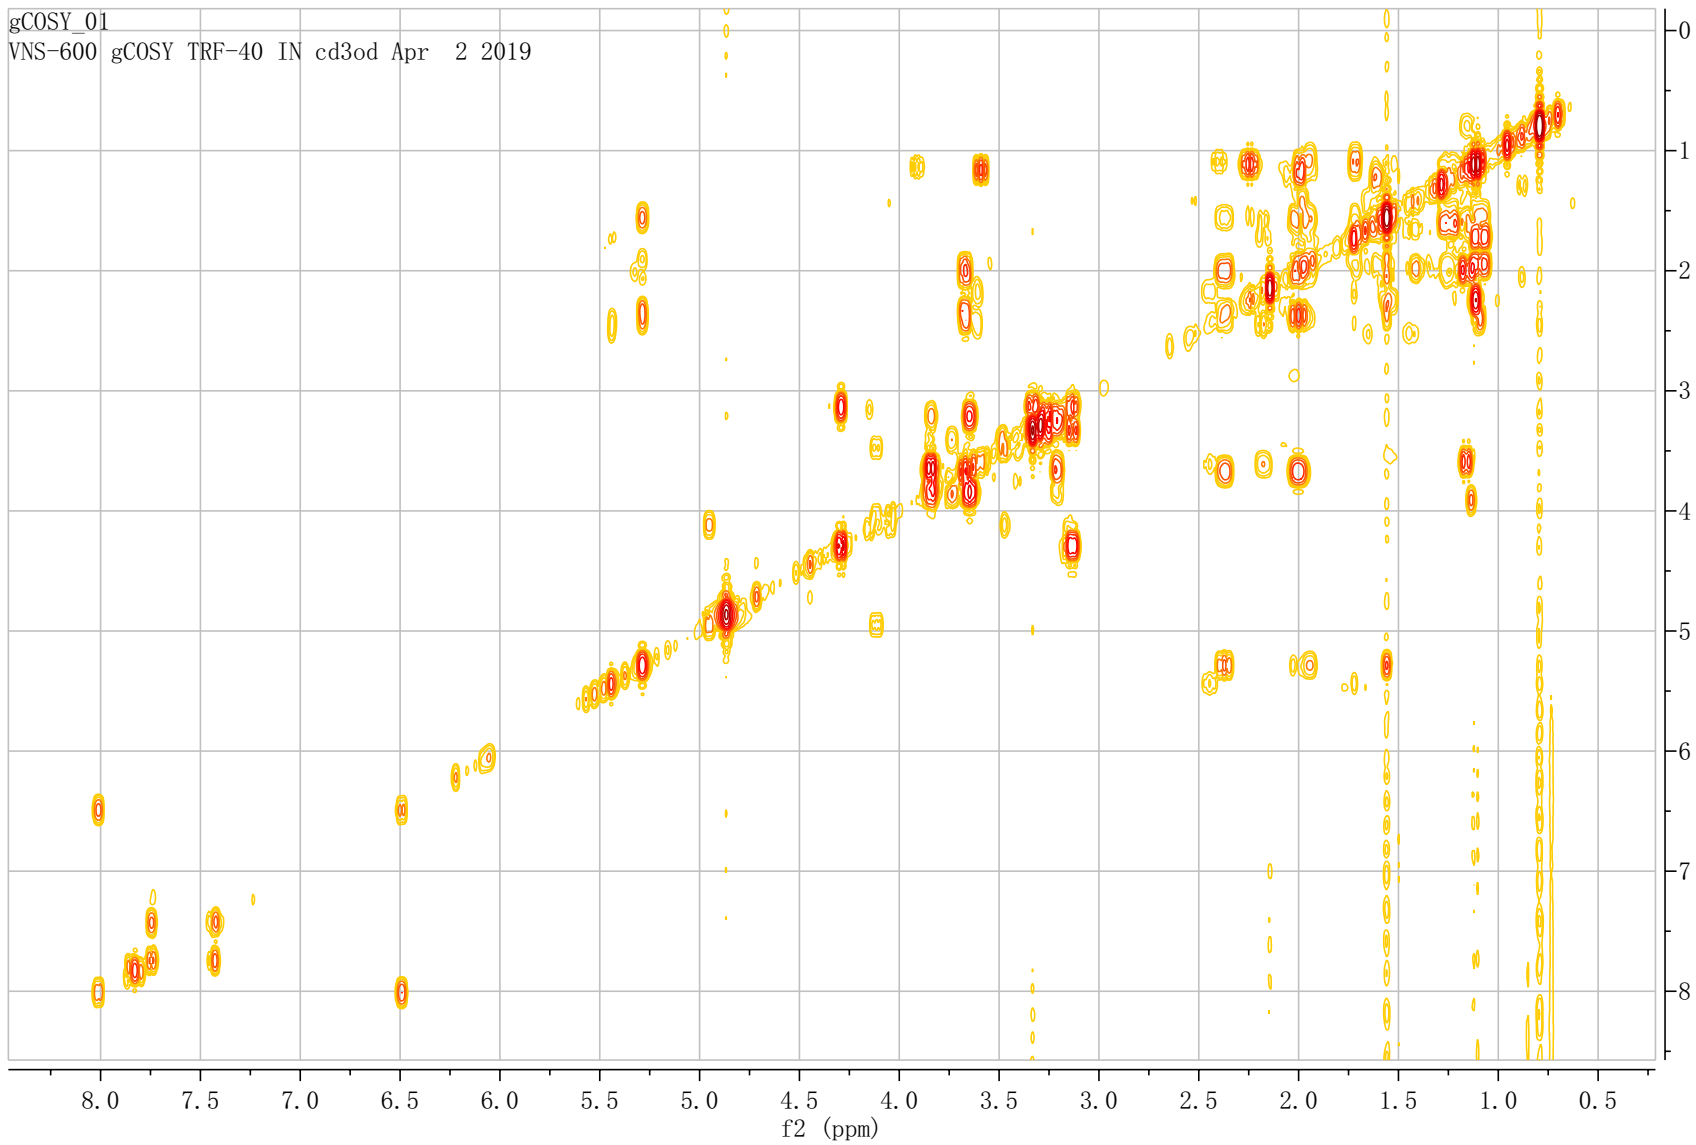

Supplement: s1 [file s1]
